# Supplementary material for: Configurational ligand isomerism in conjoined-cages
Source: Royal Society of Chemistry journal article supplement (doi:10.1039/d2cc02837a), 2022-01-01
Supplement: d2cc02837a1.pdf [file d2cc02837a1.pdf]

## Supporting Information

### **Configurational ligand isomerism in conjoined-cages<sup>†</sup>**

Hareesha Dasary,<sup>\*a</sup> Moumita Sarkar<sup>\*a</sup> and Dillip Kumar Chand<sup>\*a</sup>

<sup>a</sup> Department of Chemistry, Indian Institute of Technology Madras, Chennai 600036, India,

E-mail: dillip@iitm.ac.in

| <b>Table of Contents</b>                                                           | <b>Page</b> |
|------------------------------------------------------------------------------------|-------------|
| 1. Materials and general methods                                                   | S2          |
| 2. Synthesis and characterization of tridentate ligands ( <b>L4-L6</b> )           | S3-S44      |
| 3. Synthesis and characterization of Pd <sub>3</sub> L <sub>4</sub> type complexes | S44-S64     |
| 4. Theoretical calculations                                                        | S65-S68     |
| 5. Single crystal XRD data analysis                                                | S68-S77     |
| References                                                                         | S78-S79     |

## 1. Materials and general methods

$\text{PdCl}_2$ , pyridine-3,5-dicarboxylic acid, nicotinoyl chloride hydrochloride, and 1,2/1,3/1,4-diaminobenzene, were acquired from Aldrich; diphenylphosphorylazide (DPPA),  $\text{AgNO}_3$ ,  $\text{NaN}_3$ , and all common reagents, solvents were obtained from Spectrochem, India and were used as received without further purification. The deuterated solvents were obtained from Aldrich and Cambridge Isotope Laboratories.  $^1\text{H}$  and  $^{13}\text{C}$  NMR spectral data were obtained using a Bruker 400 MHz or 500 MHz FT NMR spectrometer in  $\text{DMSO-}d_6$ . The ESI-MS spectra were recorded on an Agilent 6545A Q-TOF, Micromass Q-TOF spectrometer and Impact QTOF HRMS system (Bruker Daltonik GmbH). The crystal structures were obtained using a Bruker X8 Kappa XRD instrument.

The regioisomeric tridentate ligands are new and has been prepared as follows. Pyridine-3-carbonyl azide <sup>1</sup> and pyridine-3,5-dicarbonyl diazide <sup>2</sup> required for the synthesis of ligands were prepared following a reported procedure.

## 2. Synthesis of the tridentate ligands (L4-L6)

The quantitative synthesis of tridentate ligands, (L4-L6) involves multiple steps as follows.

### Synthesis of Ligand L4

Pyridine-3,5-dicarbonyl diazide (500 mg, 2.30 mmol) was dissolved in 50 mL of dry CH<sub>3</sub>CN and refluxed under nitrogen flow. 1,2-diaminobenzene (630 mg, 5.80 mmol) was added to the reaction mixture and stirred at reflux for 8 h under nitrogen atmosphere to result diamine A. The resulting precipitate was collected by filtration and washed with CH<sub>3</sub>CN and dried under vacuum.

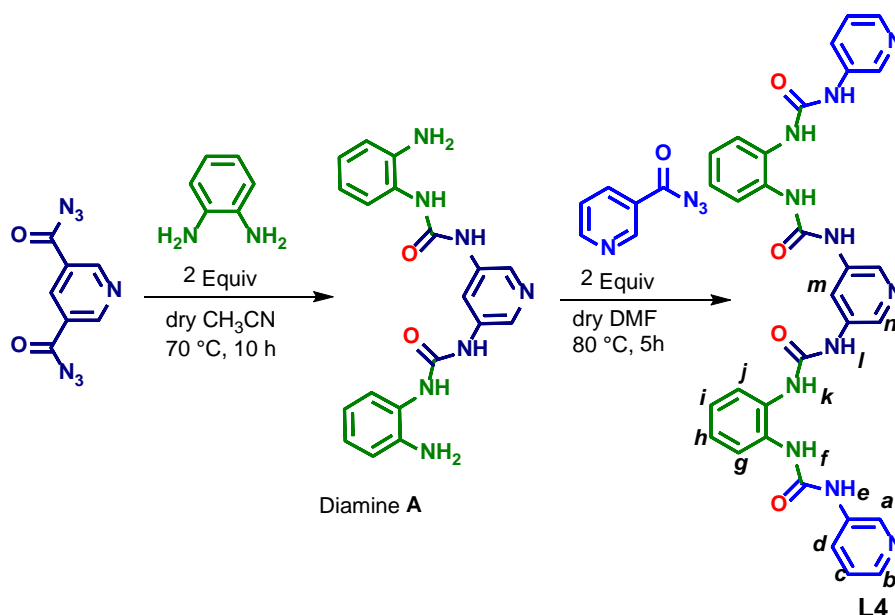

**Scheme S1.** Schematic representation of the stepwise synthesis of tridentate ligand, **L4**

**1,1'-(pyridine-3,5-diyl)bis(3-(2-aminophenyl)urea):** Yield: (434.02 mg, 50%). Melting point: 185 °C. <sup>1</sup>H NMR (400 MHz, DMSO-*d*<sub>6</sub>)  $\delta$  = 8.97 (s, 2H, H<sub>g</sub>), 8.24 (d,  $J$  = 2.3 Hz, 2H, H<sub>i</sub>), 8.14 (t,  $J$  = 2.3 Hz, 1H, H<sub>h</sub>), 7.78 (s, 2H, H<sub>f</sub>), 7.32 (dd,  $J_1$  = 7.9 Hz,  $J_2$  = 1.4 Hz, 2H, H<sub>e</sub>), 6.84 (td,  $J_1$  = 7.9 Hz,  $J_2$  = 1.5 Hz, 2H, H<sub>c</sub>), 6.73 (dd,  $J_1$  = 7.9 Hz,  $J_2$  = 1.4 Hz, 2H, H<sub>b</sub>), 6.58 (td,  $J_1$  = 7.8 Hz,  $J_2$  = 1.5 Hz, 2H, H<sub>d</sub>), 4.94 (bs, 4H, H<sub>a</sub>) ppm; <sup>13</sup>C NMR (125 MHz, DMSO-*d*<sub>6</sub>):  $\delta$  = 154.72, 142.63, 137.76, 133.99, 127.11, 126.56, 124.56, 118.68, 116.61 ppm. ESI-MS ( $m/z$ ):

calculated for  $[\mathbf{A} + \mathbf{H}]^+$  and  $[\mathbf{A} + \mathbf{Na}]^+$ : 378.1678 and 400.1498. Observed: 378.1676 and 400.1489, respectively.

Diamine A (400 mg, 1.06 mmol) was dissolved in dry DMF (4 mL), pyridine-3-carbonyl azide (349.83 mg, 2.36 mmol) was added. The reaction mixture was stirred at 80 °C for 5 h under nitrogen atmosphere. The white precipitate was isolated by adding excess H<sub>2</sub>O to the clear solution so obtained, which was filtered off, washed several times with acetone and dried under vacuum to result **L4**.

**1-(pyridin-3-yl)-3-(2-(3-(5-(3-(2-(3-(pyridin-3-yl)ureido)phenyl)ureido)pyridin-3-yl)ureido)phenyl)urea, L4.** (Yield: 510 mg, 78%). Melting point: 165 °C. <sup>1</sup>H NMR (500 MHz, DMSO-*d*<sub>6</sub>):  $\delta$  = 9.31 (s, 2H, H<sub>l</sub>), 9.24 (s, 2H, H<sub>e</sub>), 8.62 (d,  $J$  = 1.4 Hz, 2H, H<sub>a</sub>), 8.30 (d,  $J$  = 1.8 Hz, 2H, H<sub>n</sub>), 8.20-8.17 (m, 5H, H<sub>b</sub>, H<sub>f</sub>, H<sub>m</sub>), 8.13 (s, 2H, H<sub>k</sub>), 7.95 (ddd,  $J_1$  = 8.3 Hz,  $J_2$  = 2.3 Hz,  $J_3$  = 1.4 Hz, 2H, H<sub>d</sub>), 7.63 (m, 2H, H<sub>g</sub>), 8.12-7.57 (m, 2H, H<sub>j</sub>), 7.31 (dd,  $J_1$  = 8.2 Hz,  $J_2$  = 4.6 Hz, 2H, H<sub>c</sub>), 7.12-7.10 (m, 4H, H<sub>h</sub> and H<sub>i</sub>) ppm; <sup>13</sup>C NMR (125 MHz, DMSO-*d*<sub>6</sub>):  $\delta$  = 153.32, 153.11, 142.86, 140.03, 136.57, 133.20, 131.49, 130.91, 125.17, 124.47, 124.41, 124.20, 123.97, 123.64, 114.12 ppm. ESI-MS ( $m/z$ ): calculated for  $[\mathbf{L4} + \mathbf{H}]^+$  and  $[\mathbf{L4} + \mathbf{Na}]^+$ : 618.2326 and 640.2145. Observed: 618.2301 and 640.2150, respectively.



## Synthesis of ligand L5 and L6

The quantitative synthesis of tridentate ligands **L5** and **L6** requires three consecutive steps as Scheme S2 and Scheme S3.

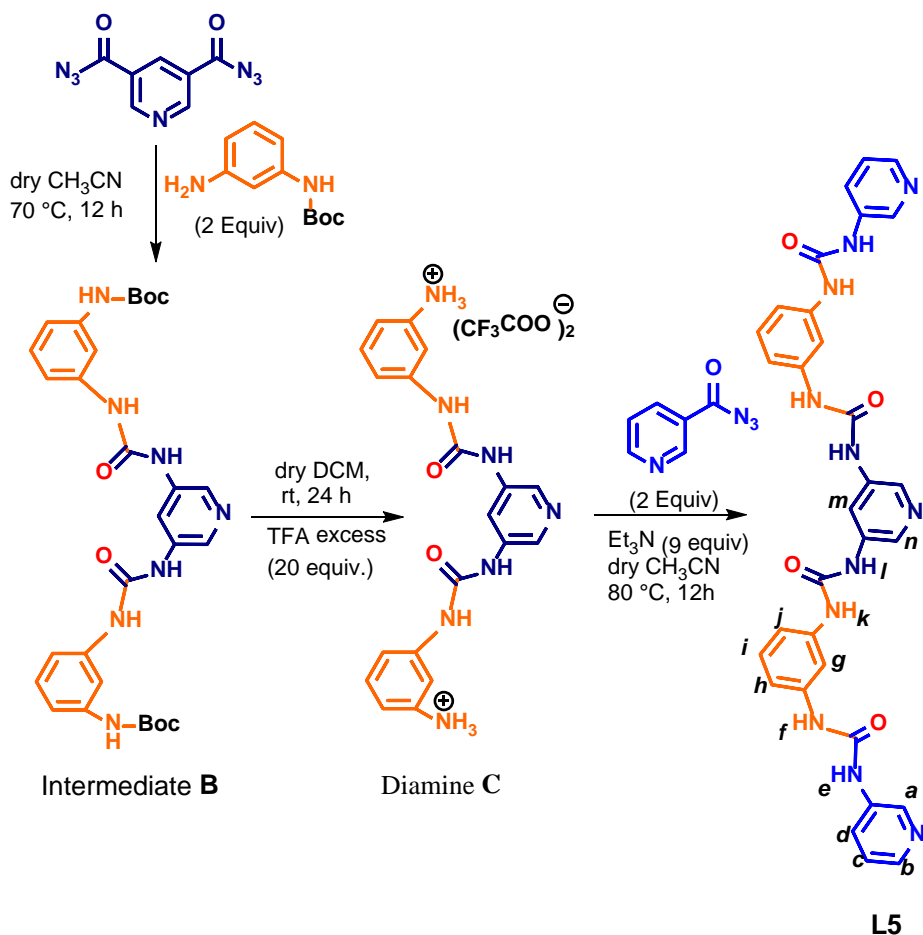

**Scheme S2.** Schematic representation of the stepwise synthesis of tridentate ligand, **L5**

The *N*-Boc-*m*-phenylenediamine<sup>3</sup> (500 mg, 2.40 mmol) and *N*-Boc-*p*-phenylenediamine<sup>3,4</sup> (500 mg, 2.40 mmol) was prepared by slight modifications of reported procedure, which were undergone condensation with pyridine-3,5-dicarbonyl diazide (236.97 mg, 1.09 mmol) at 2.2:1 ratio in 60 mL dry acetonitrile at 70 °C for 12 h. The resulted precipitate was filtered and washed with acetonitrile and dried under vacuum to afford the Boc protected intermediates **B** (465.92 mg, 74%) and **D** (465.92mg, 74%), respectively.

Boc protected intermediates **B** (400 mg, 0.69 mmol) and **D** (400 mg, 0.69 mmol) were treated with trifluoroacetic acid (1573.48 mg, 13.80 mmol) (at 1:20 molar ratio) to obtain a clear yellow solution in 50 mL dry DCM. The reaction mixture was stirred at room temperature for 12 h. The solvent (DCM) was evaporated and the resulting oily solution was washed with toluene and finally dried under vacuum to obtain corresponding diamines **C** (332.82 mg, 82%) and **E** (345 mg, 85%), respectively and utilized in the next step without further purification, isolation, and analysis.

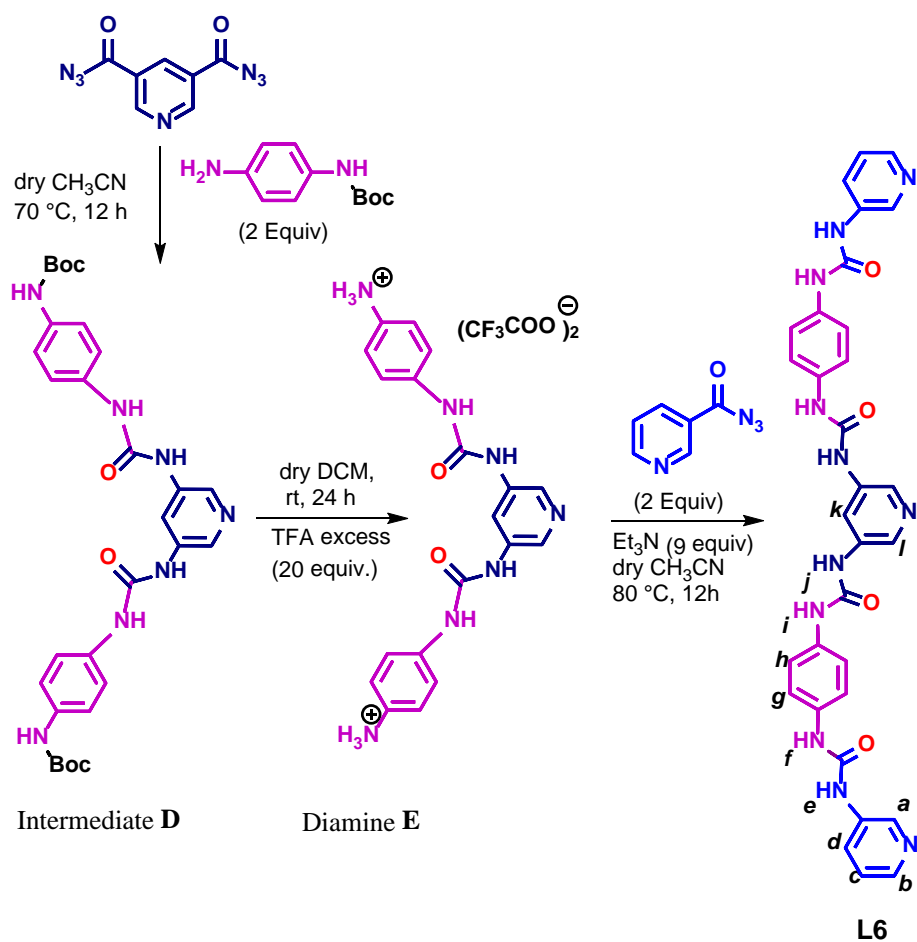

**Scheme S3.** Schematic representation of the stepwise synthesis of tridentate ligand, **L6**

Diamines **C** (320 mg, 0.54 mmol) and **E** (320 mg, 0.54 mmol) were dissolved in dry acetonitrile and triethylamine (491.78 mg, 4.86 mmol) was added to neutralize the acidic nature of the

compounds. To this pyridine-3-carbonyl azide (159.98 mg, 1.08 mmol) was added at 70 °C and the reaction solution was stirred for 10 h to afford the targeted precipitates which were filtered and washed with acetonitrile and vacuum dried to result the tridentate ligands **L5** (133.41 mg, 40%) and **L6** (140.08 mg, 42%).

**Tert-butyl (3-aminophenyl)carbamate**, *N*-Boc-*m*-phenylenediamine<sup>3</sup>: (615.78 mg, 32%) <sup>1</sup>H NMR (400 MHz, CDCl<sub>3</sub>)  $\delta$  = 7.03 (t, *J* = 8.0 Hz, 1H, H<sub>c</sub>), 6.97 (s, 1H, H<sub>f</sub>), 6.54 (ddd, *J* = 8.0, 2.0, 0.8 Hz, 1H, H<sub>b</sub>), 6.36 (ddd, *J* = 8.0, 2.0, 0.8 Hz, 1H, H<sub>e</sub>), 3.67 (bs, 2H, H<sub>a</sub>), 1.51 (s, 9H) *ppm*; ESI-MS (*m/z*): calculated for [M + H]<sup>+</sup> and [M + Na]<sup>+</sup>: 209.1290 and 231.1190; Observed: 209.1287 and 231.1102, respectively.

**di-tert-butyl((((pyridine-3,5-diylbis(azanediyl))bis(carbonyl))bis(azanediyl))bis(3,1-phenylene))dicarbamate**, Intermediate **B**: Yield: (465.92 mg, 74%) <sup>1</sup>H NMR (400 MHz, DMSO-*d*<sub>6</sub>)  $\delta$  = 9.32 (s, 2H, H<sub>a</sub>), 8.75 (s, 2H, H<sub>e</sub>), 8.72 (s, 2H, H<sub>i</sub>), 8.22 (s, 3H, H<sub>b</sub>, H<sub>h</sub>), 7.62 (bs, 2H, H<sub>c</sub>), 7.14 (m, 4H, H<sub>f</sub>, H<sub>g</sub>), 7.03 (m, 2H, H<sub>d</sub>) *ppm*; <sup>13</sup>C NMR (125 MHz, DMSO-*d*<sub>6</sub>):  $\delta$  = 152.73, 152.29, 139.99, 139.71, 136.42, 128.89, 113.97, 112.17, 112.09, 108.17, 78.94 *ppm*. ESI-MS (*m/z*): calculated for [M + H]<sup>+</sup> and [M + Na]<sup>+</sup>: 578.2727 and 600.2547. Observed: 578.2730 and 600.2550, respectively.

**1-(pyridin-3-yl)-3-(3-(3-(5-(3-(3-(pyridin-3-yl)ureido)phenyl)ureido)pyridin-3-yl)ureido)phenyl)urea, L5**. (Yield: 133.41, 40%). Melting point: 318 °C. <sup>1</sup>H NMR (500 MHz, DMSO-*d*<sub>6</sub>)  $\delta$  = 8.89-8.79 (m, 4H, urea NH), 8.61 (d, *J* = 2.7 Hz, 2H, H<sub>a</sub>), 8.30 (t, *J* = 2.3 Hz, 1H, H<sub>m</sub>), 8.23 (d, *J* = 2.3 Hz, 2H, H<sub>n</sub>), 8.18 (dd, *J*<sub>1</sub> = 4.6 Hz, *J*<sub>2</sub> = 1.5 Hz, 2H, H<sub>b</sub>), 7.94 (ddd, *J*<sub>1</sub> = 8.3 Hz, *J*<sub>2</sub> = 2.6 Hz, *J*<sub>3</sub> = 1.5 Hz, 2H, H<sub>d</sub>), 7.73 (t, *J* = 2.1 Hz, 2H, H<sub>g</sub>), 7.31 (ddd, *J*<sub>1</sub> = 8.3 Hz, *J*<sub>2</sub> = 4.6 Hz, *J*<sub>3</sub> = 0.7 Hz, 2H, H<sub>c</sub>), 7.24-7.15 (m, 2H, H<sub>h</sub>), 7.13-7.05 (m, 4H, H<sub>j</sub> and H<sub>i</sub>), 7.12-7.10 (m, 4H, H<sub>h</sub> and H<sub>i</sub>) *ppm*; <sup>13</sup>C NMR (125 MHz, DMSO-*d*<sub>6</sub>):  $\delta$  = 152.52, 152.41, 142.88, 140.07, 139.96, 136.48, 133.18, 129.18, 125.14, 123.64, 114.10, 112.12, 108.19 *ppm*.

ESI-MS ( $m/z$ ): calculated for  $[\mathbf{L5} + \text{H}]^+$  and  $[\mathbf{L5} + \text{Na}]^+$ : 618.2326 and 640.2145. Observed: 618.2311 and 640.2111, respectively.

**Tert-butyl (4-aminophenyl)carbamate**, *N*-Boc-*p*-phenylenediamine<sup>3</sup>: (615.78 mg, 32%) <sup>1</sup>H NMR (400 MHz, CDCl<sub>3</sub>)  $\delta$  = 7.12 (d,  $J$  = 8.0 Hz, 2H, H<sub>c</sub>), 6.64 (d,  $J$  = 8.0 Hz, 2H, H<sub>b</sub>), 6.27 (s, 1H, H<sub>d</sub>), 3.53 (s, 2H, H<sub>a</sub>), 1.50 (s, 9H) *ppm*; ESI-MS ( $m/z$ ): calculated for  $[\mathbf{M} + \text{H}]^+$  and  $[\mathbf{M} + \text{Na}]^+$ : 209.1290 and 231.1190; Observed: 209.1286 and 231.1103, respectively.

**di-tert-butyl((((pyridine-3,5-diylbis(azanediyl))bis(carbonyl))bis(azanediyl))bis(4,1-phenylene))dicarbamate**, Intermediate **D**: Yield: (465.92 mg, 74%) <sup>1</sup>H NMR (400 MHz, DMSO-*d*<sub>6</sub>)  $\delta$  = 9.20 (s, 2H, H<sub>a</sub>), 8.81 (s, 2H, H<sub>e</sub>), 8.57 (s, 2H, H<sub>d</sub>), 8.22 (s, 2H, H<sub>f</sub>), 8.19 (s, 1H, H<sub>g</sub>), 7.35 (m, 4H, H<sub>b</sub>, H<sub>c</sub>), *ppm*; <sup>13</sup>C NMR (125 MHz, DMSO-*d*<sub>6</sub>):  $\delta$  = 152.87, 152.52, 136.55, 134.17, 133.86, 133.01, 119.00, 118.76, 113.98, 78.77 *ppm*. ESI-MS ( $m/z$ ): calculated for  $[\mathbf{M} + \text{H}]^+$  and  $[\mathbf{M} + \text{Na}]^+$ : 578.2727 and 600.2547. Observed: 578.2713 and 600.2528, respectively.

**1-(pyridin-3-yl)-3-(4-(3-(5-(3-(4-(3-(pyridin-3-yl)ureido)phenyl)ureido)pyridin-3-yl)ureido)phenyl)urea**, **L6**. (Yield: 140.08, 42%). Melting point: 300 °C. <sup>1</sup>H NMR (500 MHz, DMSO-*d*<sub>6</sub>)  $\delta$  = 8.83 (s, 2H, H<sub>j</sub>), 8.79 (s, 2H, H<sub>e</sub>), 8.69 (s, 2H, H<sub>i</sub>), 8.62 (s, 2H, H<sub>f</sub>), 8.59 (d,  $J$  = 2.3 Hz, 2H, H<sub>a</sub>), 8.23 (d,  $J$  = 2.14 Hz, 2H, H<sub>l</sub>), 8.20 (d,  $J$  = 2.03 Hz, 1H, H<sub>k</sub>), 8.17 (dd,  $J_1$  = 4.73 Hz,  $J_2$  = 1.15 Hz, 2H, H<sub>b</sub>), 7.92 (ddd,  $J_1$  = 8.4 Hz,  $J_2$  = 2.7 Hz,  $J_3$  = 1.5 Hz, 2H, H<sub>d</sub>), 7.38 (m, 8H, H<sub>g</sub> and H<sub>h</sub>), 7.31 (dd,  $J_1$  = 8.3 Hz,  $J_2$  = 4.6 Hz, 2H, H<sub>c</sub>) *ppm*; <sup>13</sup>C NMR (125 MHz, DMSO-*d*<sub>6</sub>):  $\delta$  = 152.68, 152.57, 142.73, 140.02, 136.59, 136.57, 136.52, 134.07, 134.03, 133.08, 125.08, 123.61, 120.96, 119.24, 119.19, 114.13 *ppm*. ESI-MS ( $m/z$ ): calculated for  $[\mathbf{L6} + \text{H}]^+$  and  $[\mathbf{L6} + \text{Na}]^+$ : 618.2326 and 640.2145. Observed: 618.2307 and 640.2116, respectively.

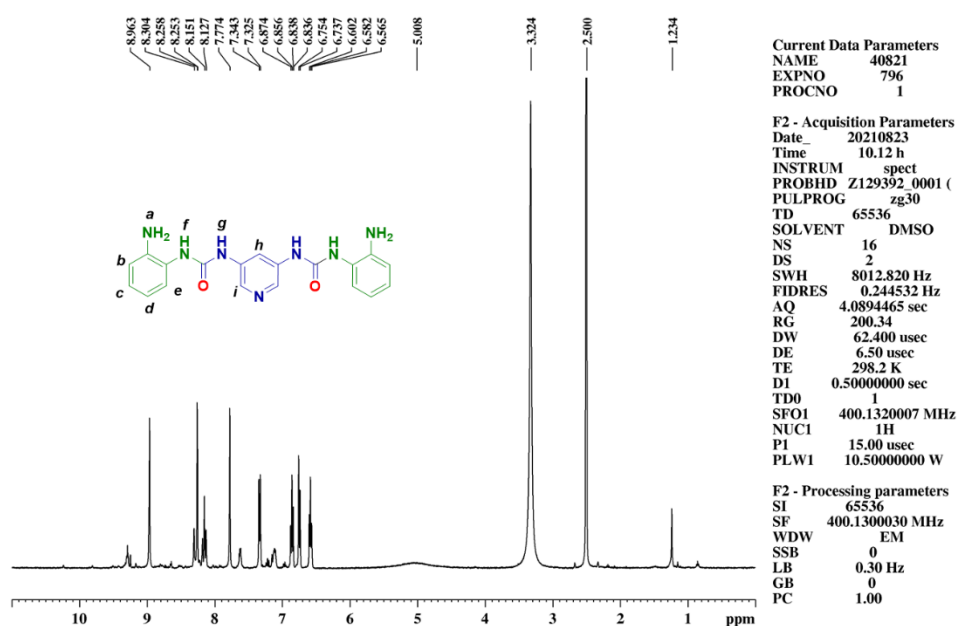

**Fig. S1** 400 MHz <sup>1</sup>H NMR spectrum of diamine **A** in DMSO-*d*<sub>6</sub>.

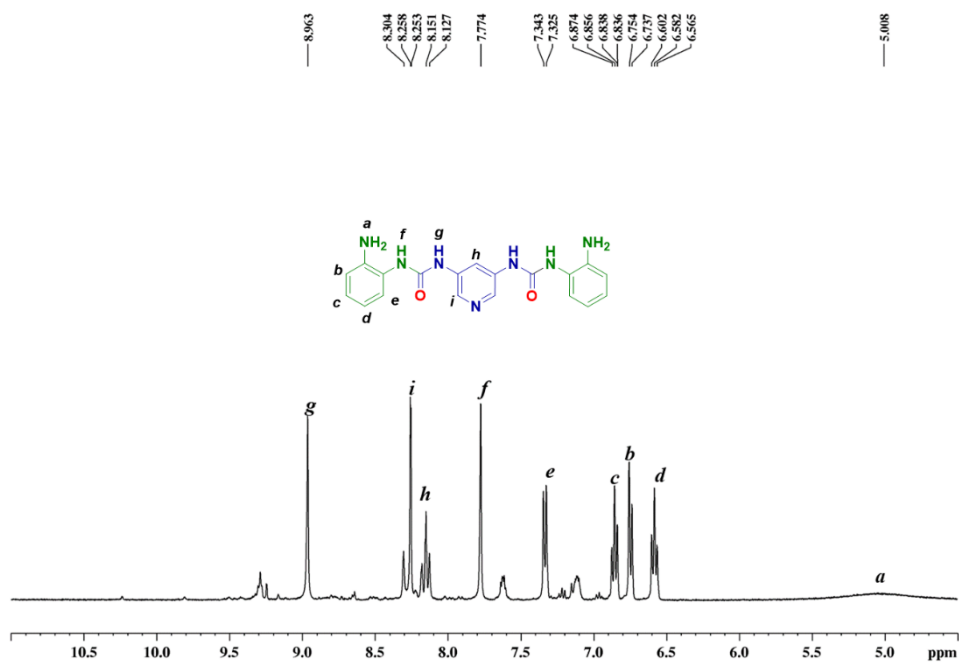

**Fig. S2** 400 MHz <sup>1</sup>H NMR expansion spectrum of diamine **A** in DMSO-*d*<sub>6</sub>.

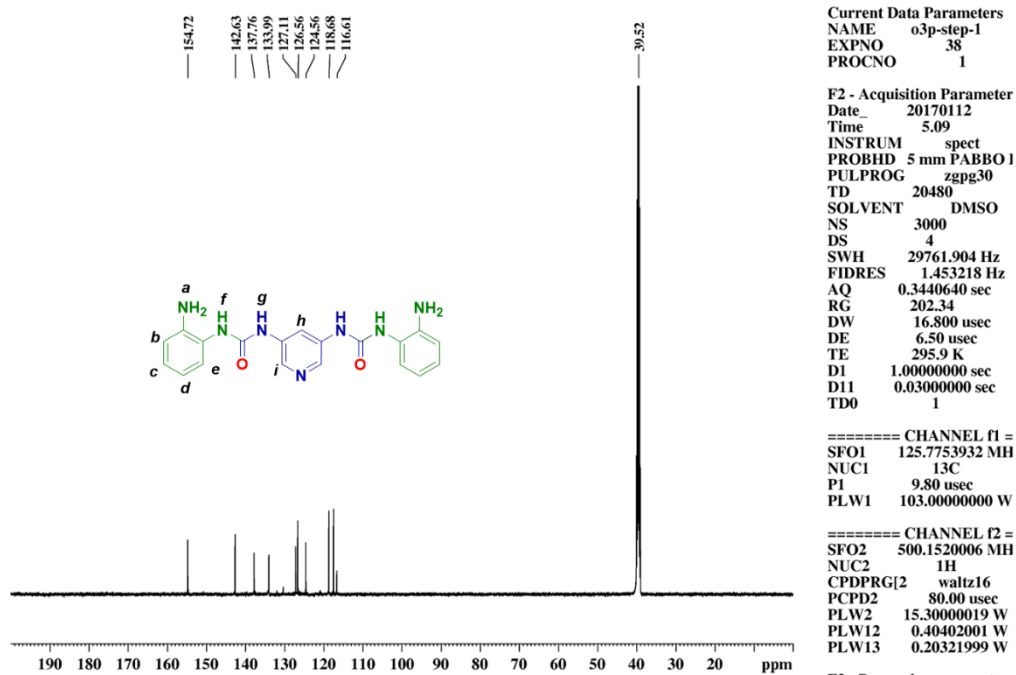

**Fig. S3** 125 MHz  $^{13}\text{C}$  NMR spectrum of diamine A in  $\text{DMSO-}d_6$ .

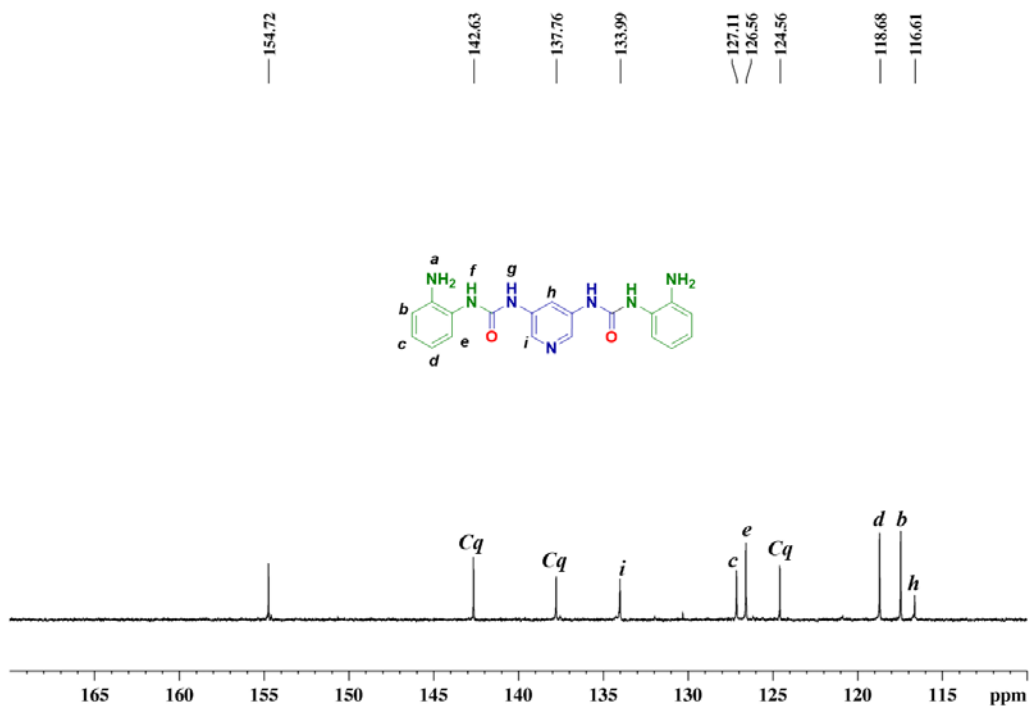

**Fig. S4** 125 MHz  $^{13}\text{C}$  NMR expansion spectrum of diamine A in  $\text{DMSO-}d_6$ .

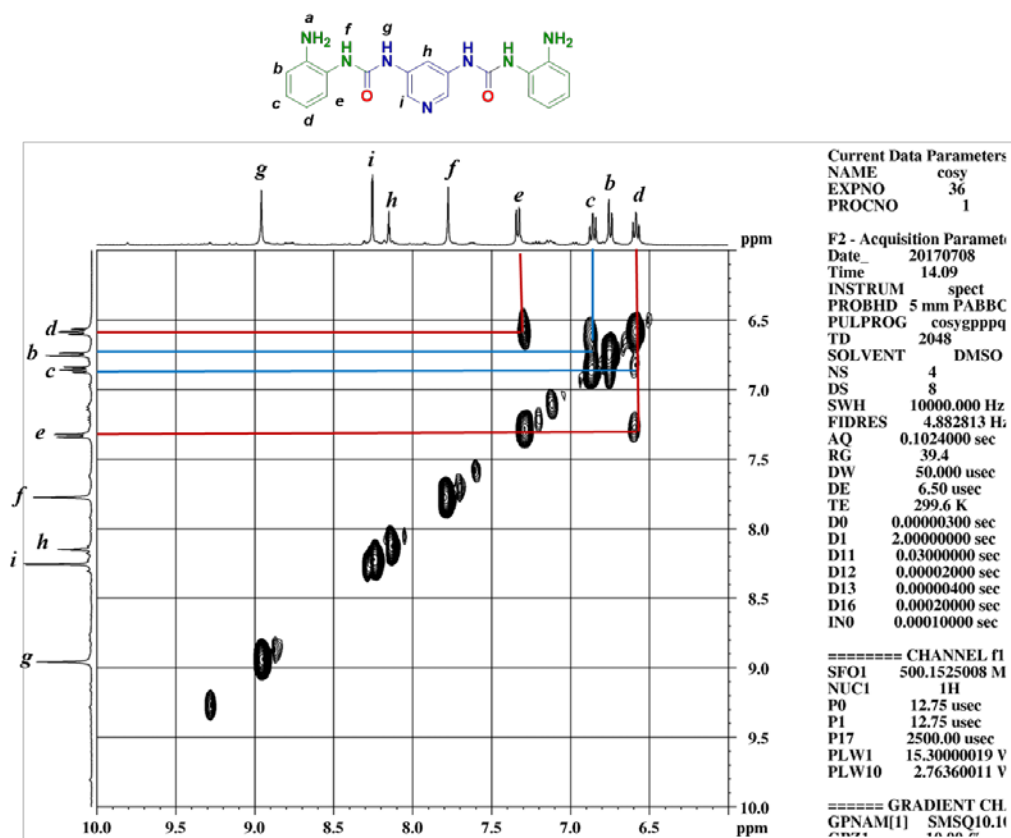

**Fig. S5** 500 MHz H-H COSY expansion spectrum of diamine **A** in DMSO-*d*<sub>6</sub>.

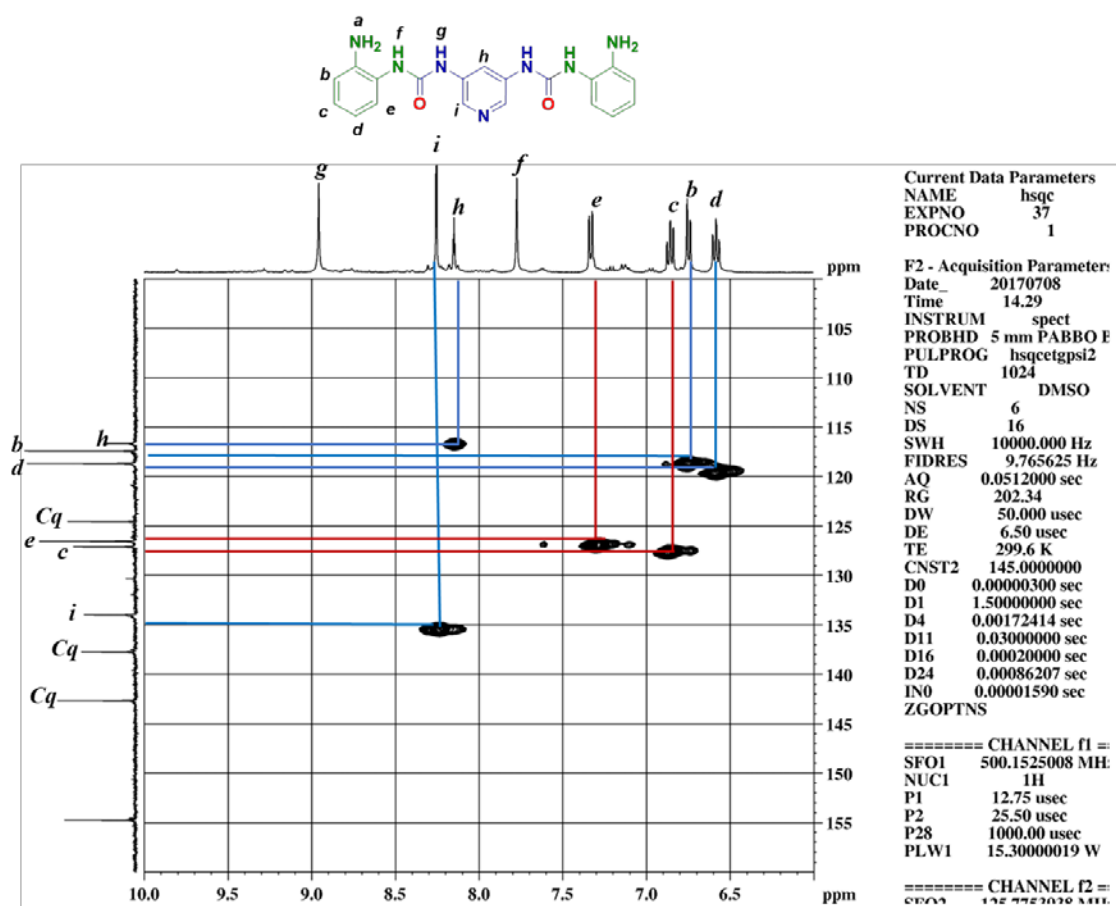

**Fig. S6** 500 MHz HSQC expansion spectrum of diamine **A** in DMSO-*d*<sub>6</sub>.



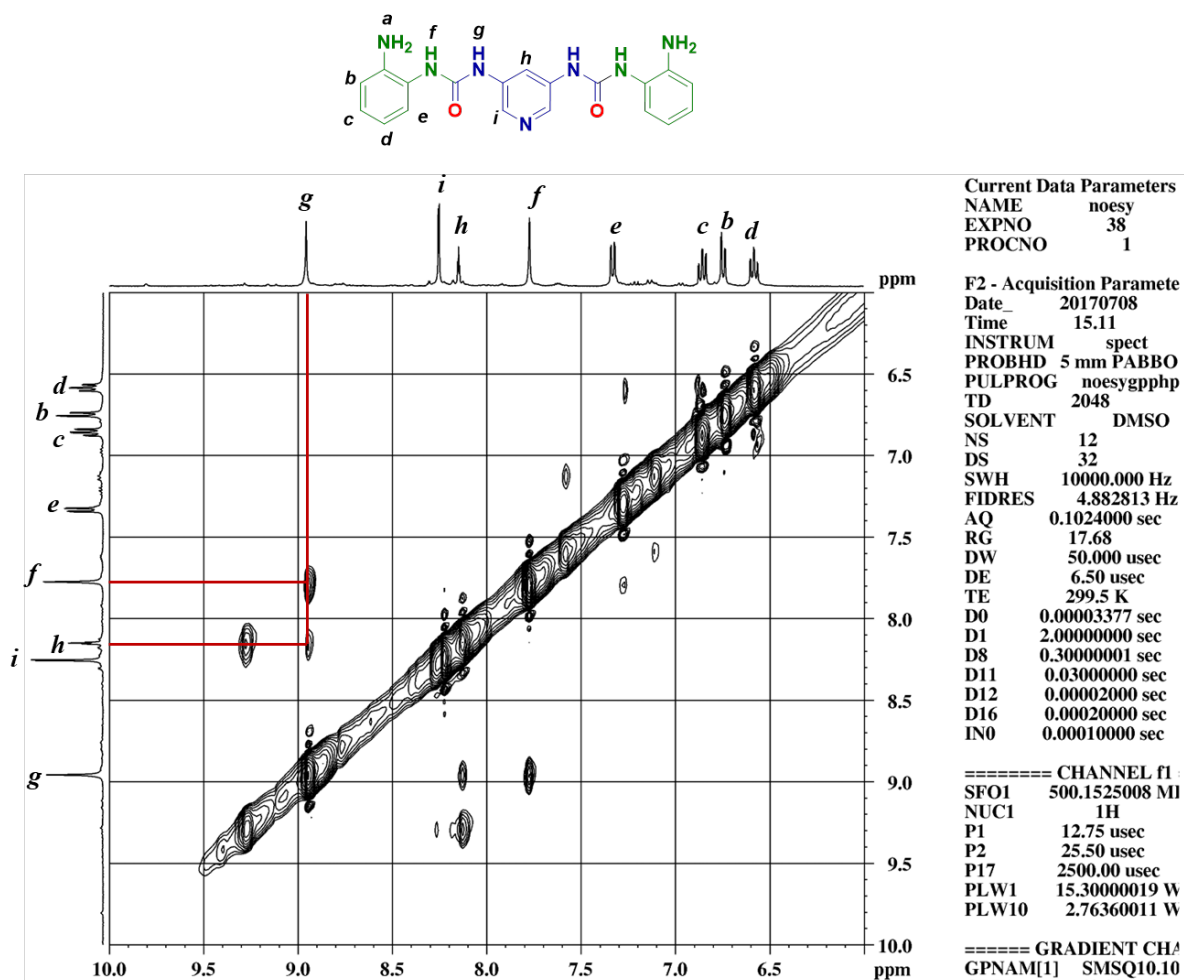

**Fig. S7** 500 MHz NOESY expansion spectrum of diamine **A** in DMSO-*d*<sub>6</sub>.

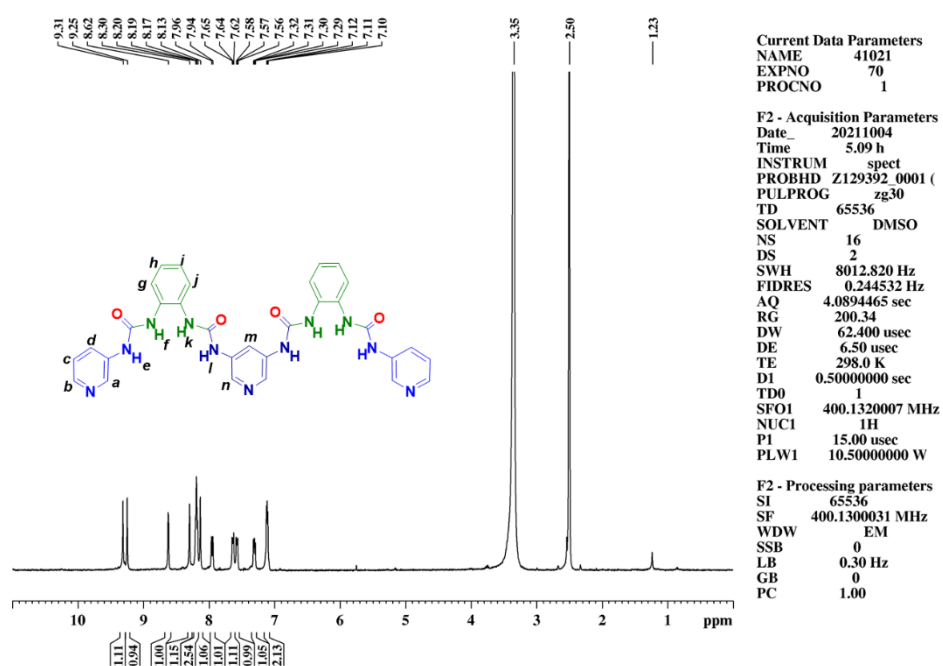

**Fig. S8** 400 MHz  $^1\text{H}$  NMR spectrum of ligand **L4** in  $\text{DMSO}-d_6$ .

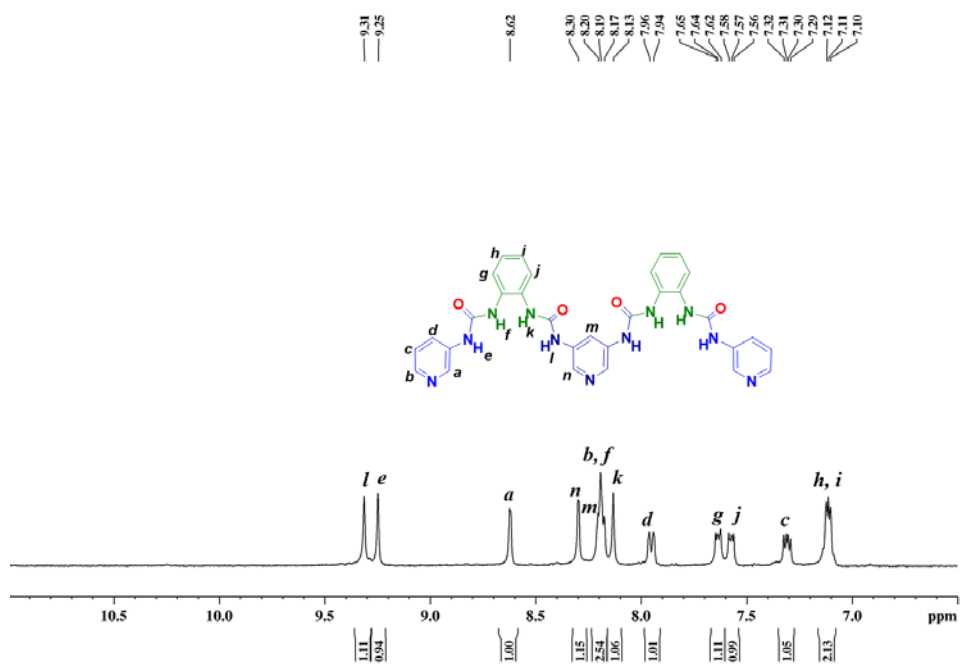

**Fig. S9** 400 MHz  $^1\text{H}$  NMR expansion spectrum of ligand **L4** in  $\text{DMSO}-d_6$ .

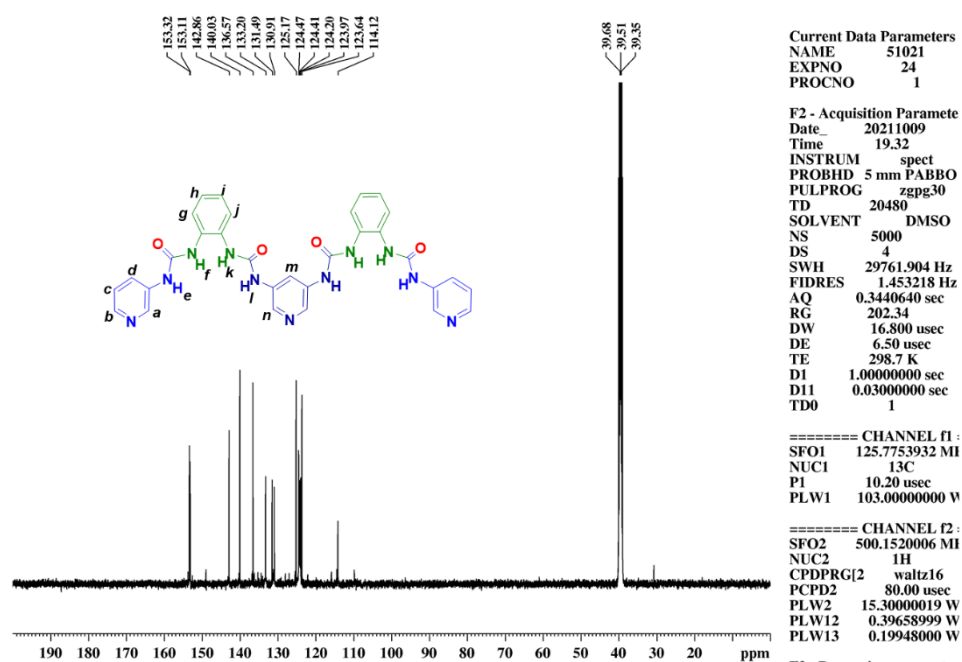

**Fig. S10** 125 MHz  $^{13}\text{C}$  NMR spectrum of ligand **L4** in  $\text{DMSO}-d_6$ .

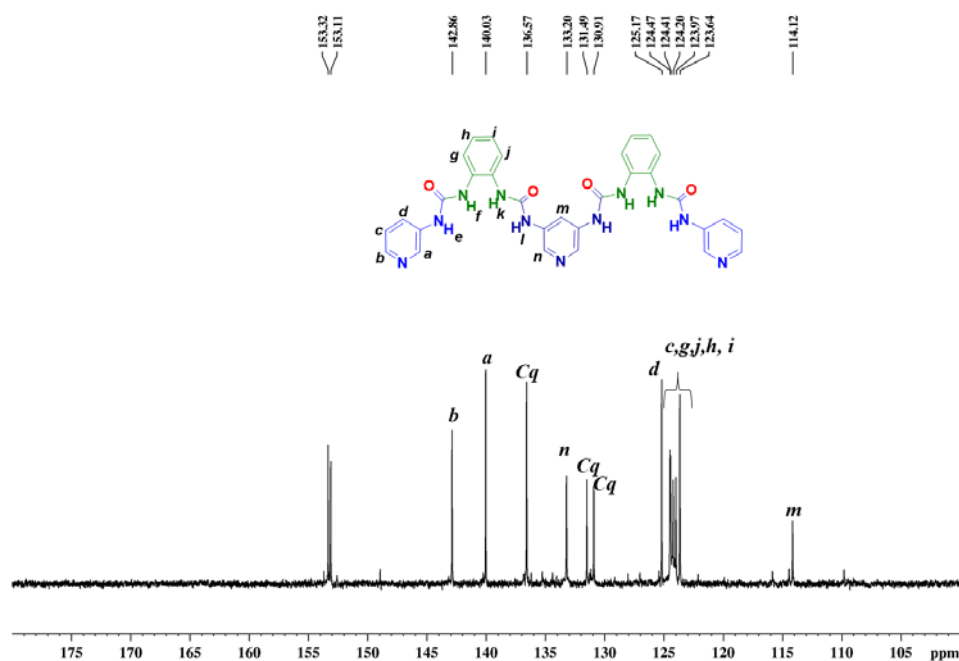

**Fig. S11** 125 MHz  $^{13}\text{C}$  NMR expansion spectrum of ligand **L4** in  $\text{DMSO}-d_6$ .

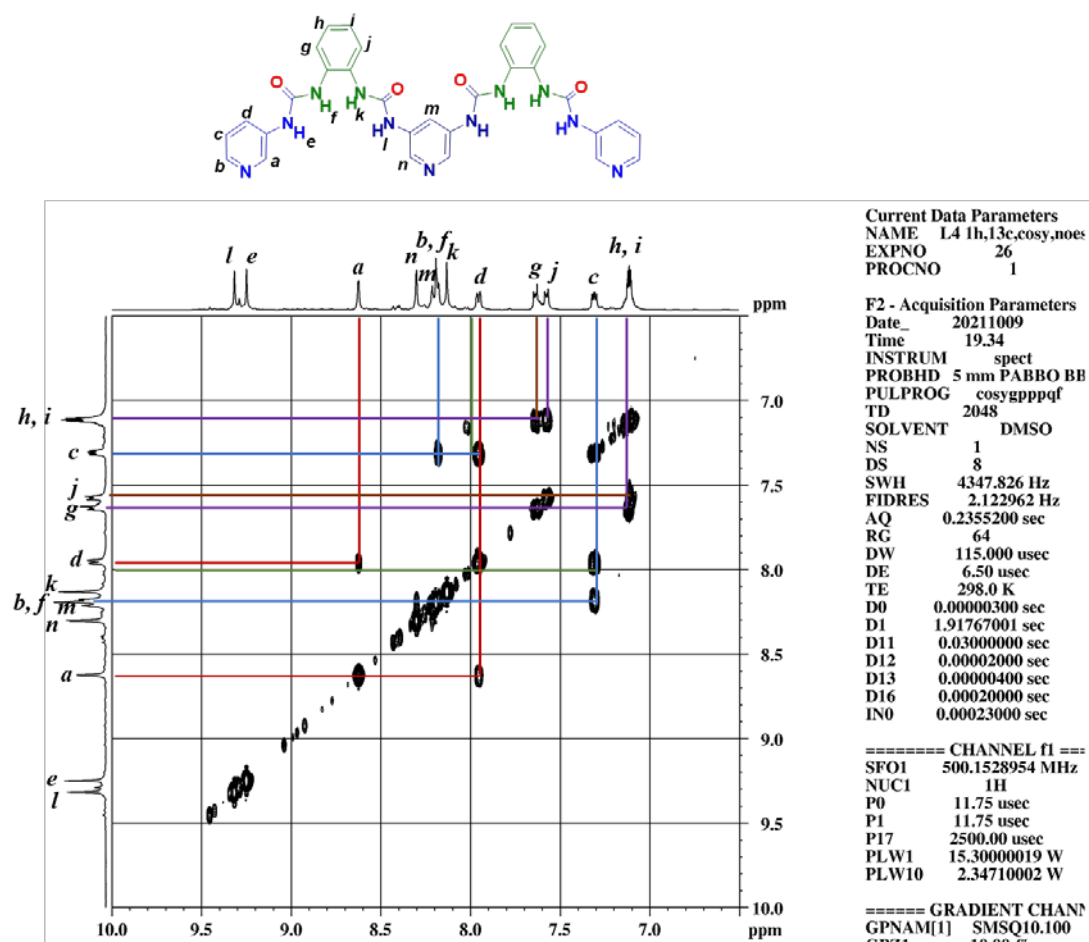

**Fig. S12** 500 MHz H-H COSY expansion spectrum of ligand **L4** in DMSO-*d*<sub>6</sub>.



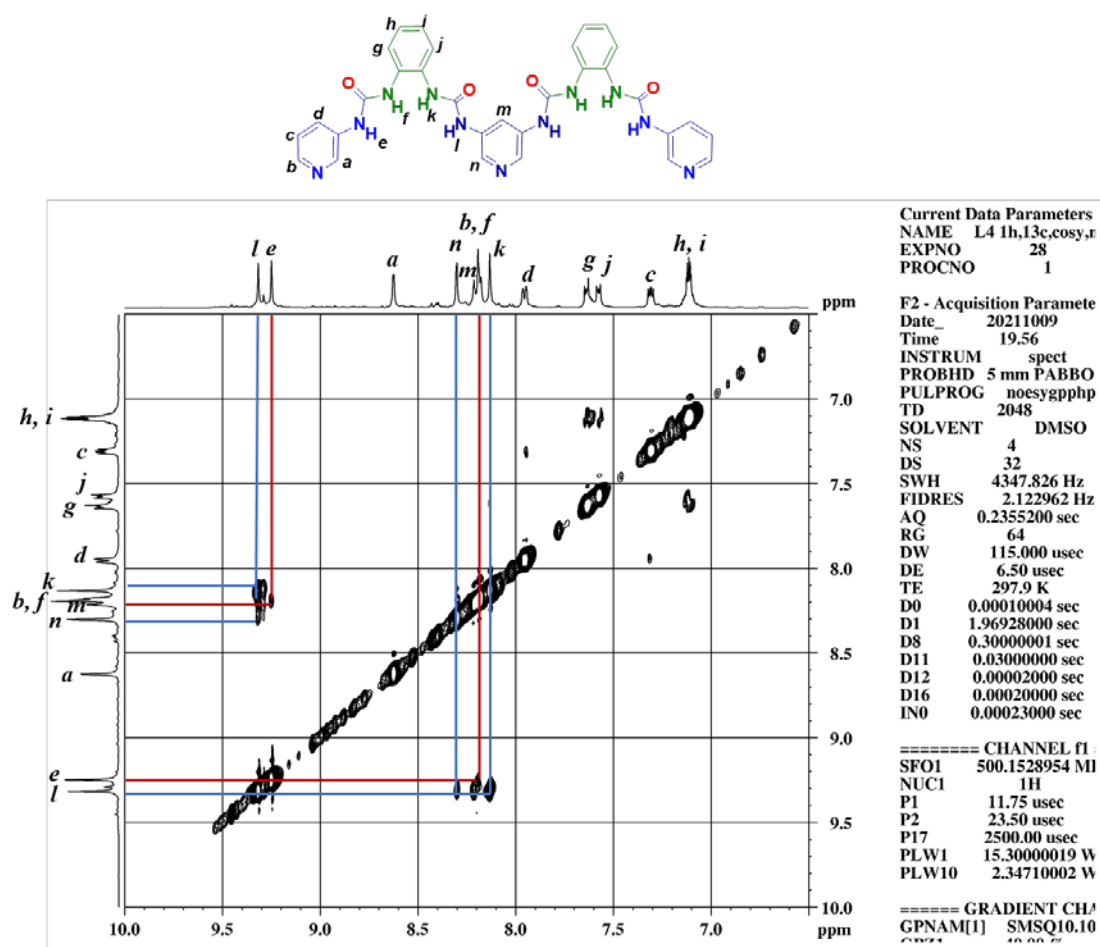

**Fig. S14** 500 MHz NOESY expansion spectrum of ligand **L4** in DMSO-*d*<sub>6</sub>.

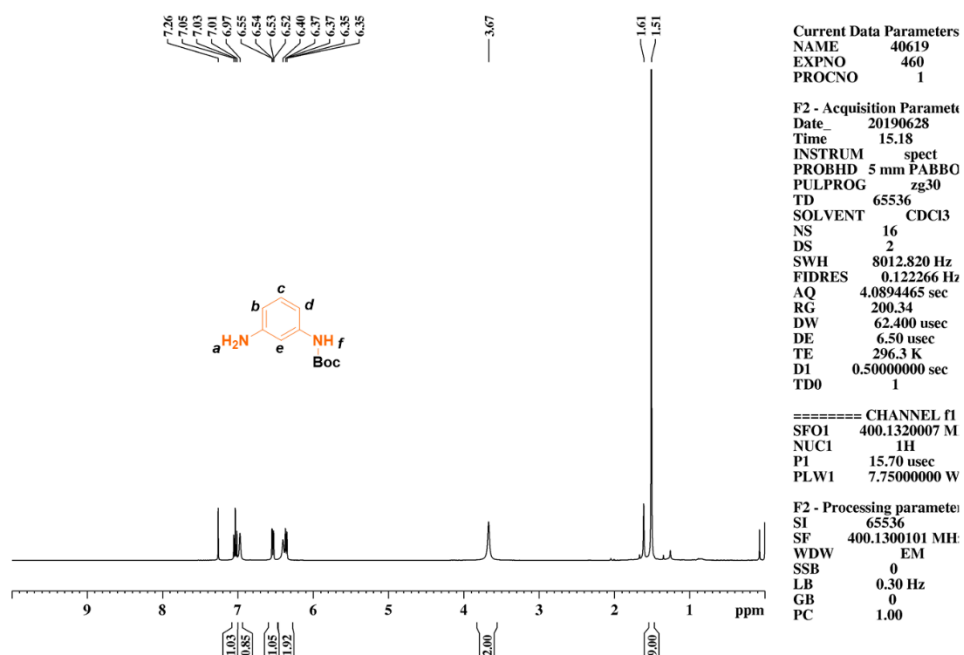

**Fig. S15** 400 MHz <sup>1</sup>H NMR spectrum of *N*-Boc-*m*-phenylenediamine in CDCl<sub>3</sub>.

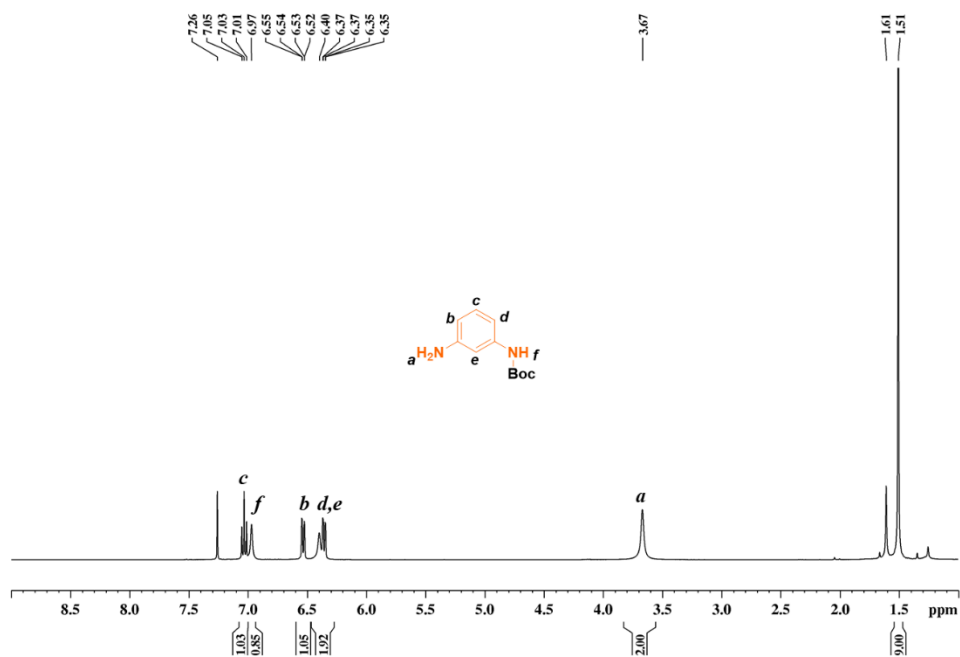

**Fig. S16** 400 MHz <sup>1</sup>H NMR expansion spectrum of *N*-Boc-*m*-phenylenediamine in CDCl<sub>3</sub>.

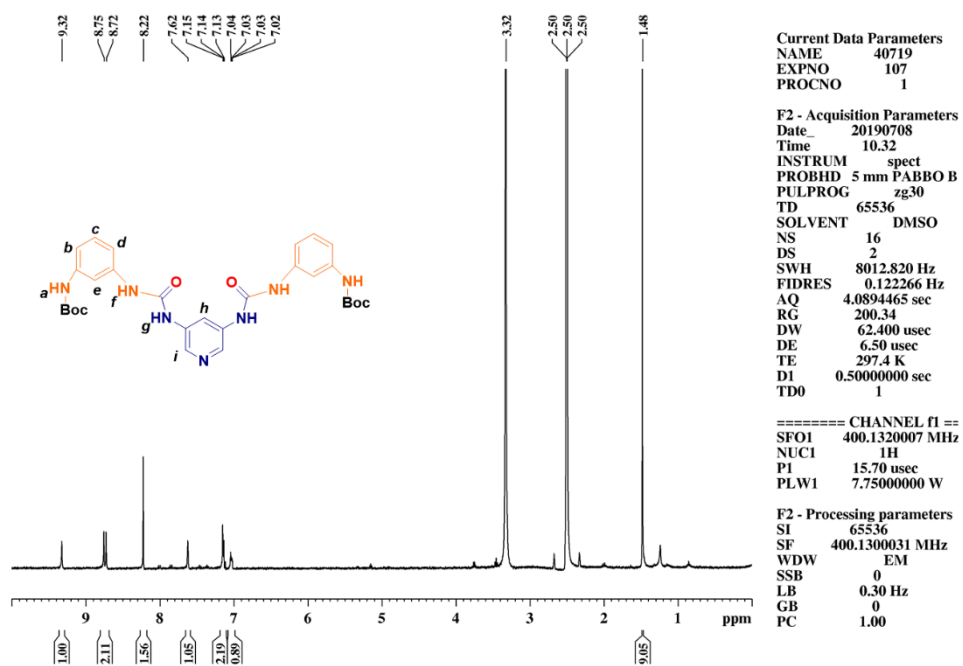

**Fig. S17** 400 MHz <sup>1</sup>H NMR spectrum of Boc protected diamine **B** in DMSO-*d*<sub>6</sub>.

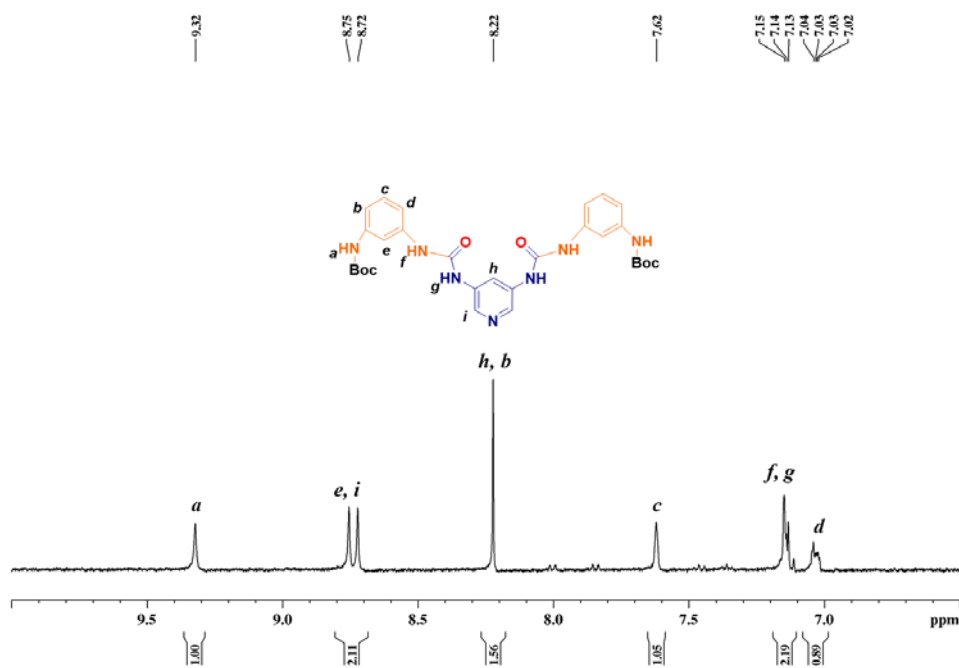

**Fig. S18** 400 MHz <sup>1</sup>H NMR expansion spectrum of Boc protected diamine **B** in DMSO-*d*<sub>6</sub>.



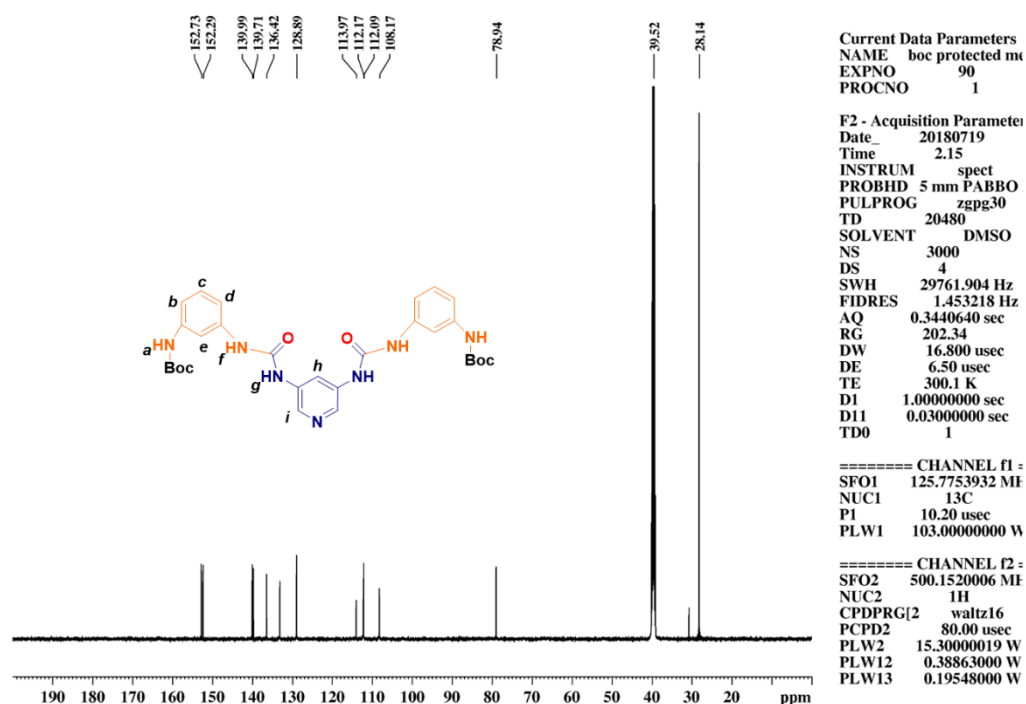

Fig. S19 125 MHz  $^{13}\text{C}$  NMR spectrum of Intermediate **B** in  $\text{DMSO}-d_6$ .

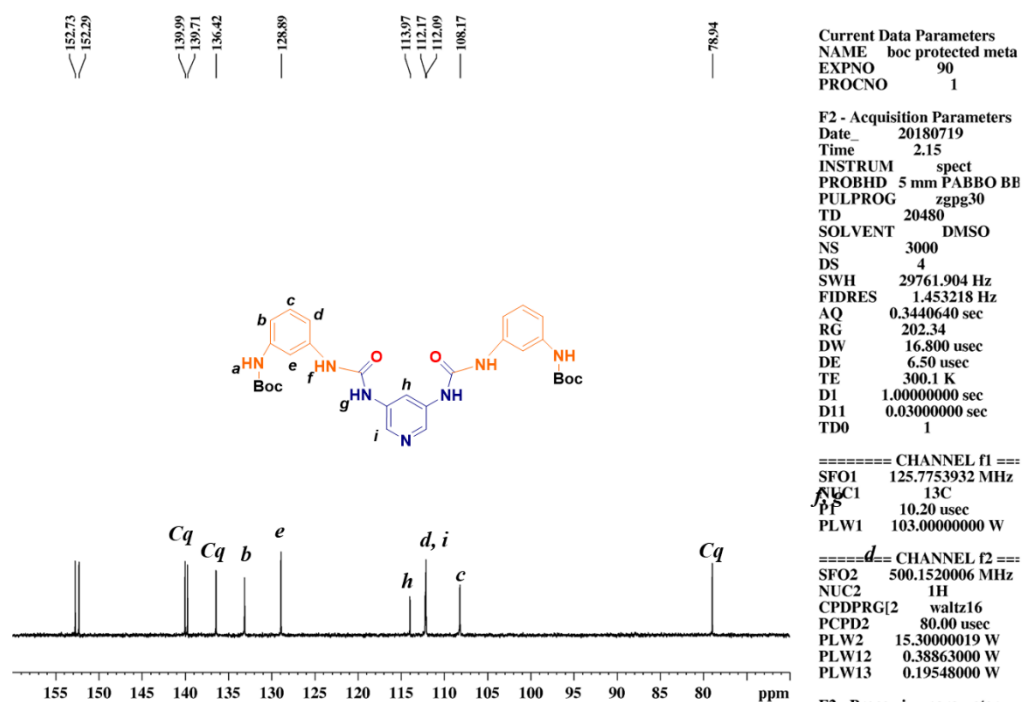

Fig. S20 125 MHz  $^{13}\text{C}$  NMR expansion spectrum of Intermediate **B** in  $\text{DMSO}-d_6$ .

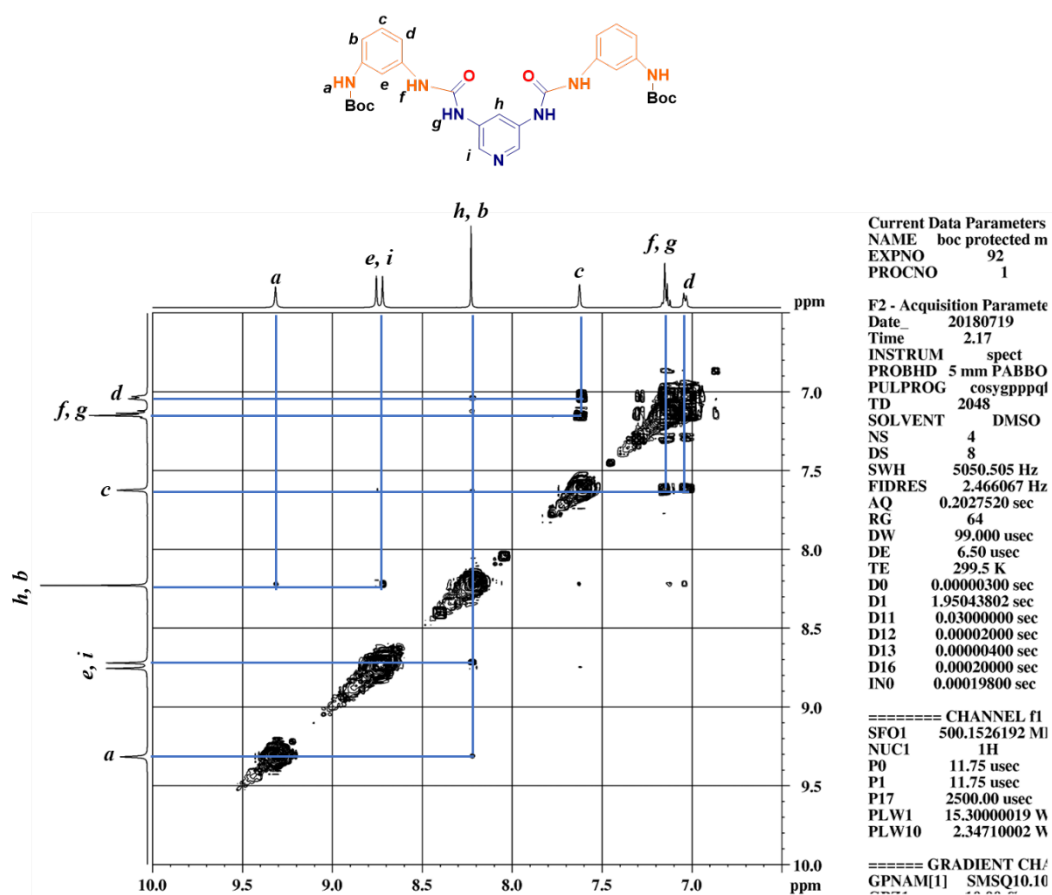

**Fig. S21** 500 MHz H-H COSY expansion spectrum of Intermediate **B** in DMSO-*d*<sub>6</sub>.

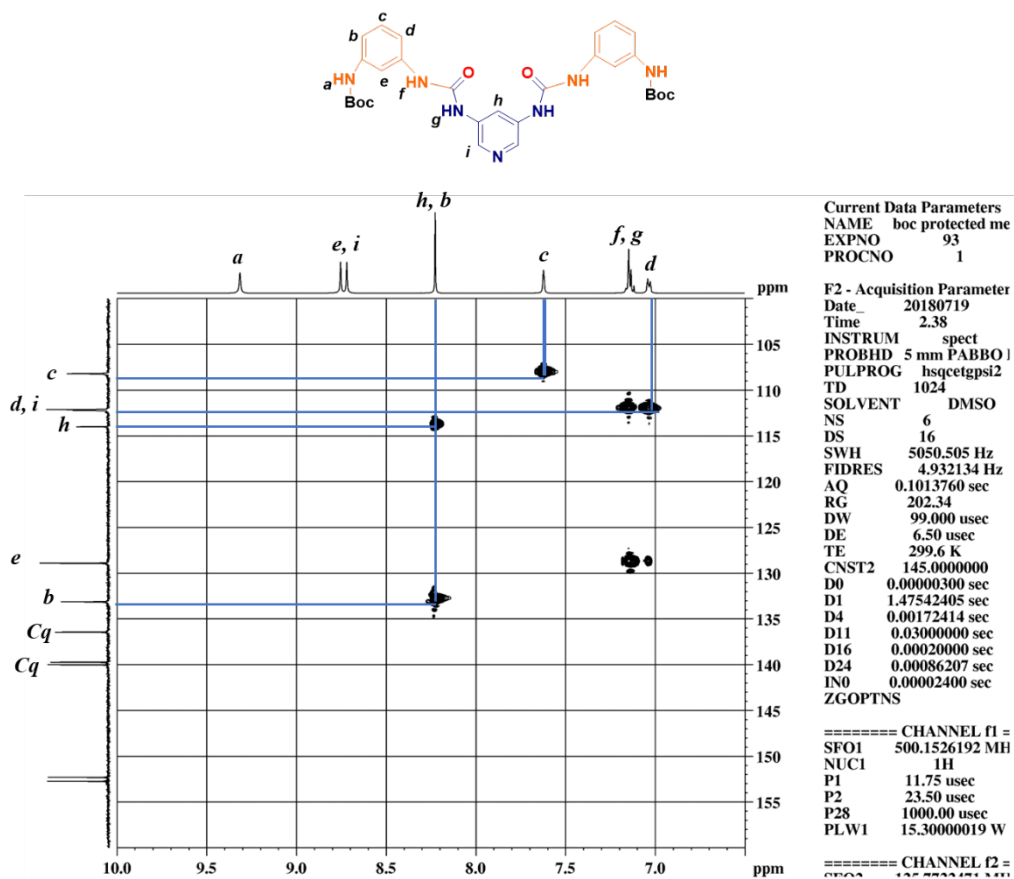

**Fig. S22** 500 MHz HSQC expansion spectrum of Intermediate **B** in DMSO-*d*<sub>6</sub>.

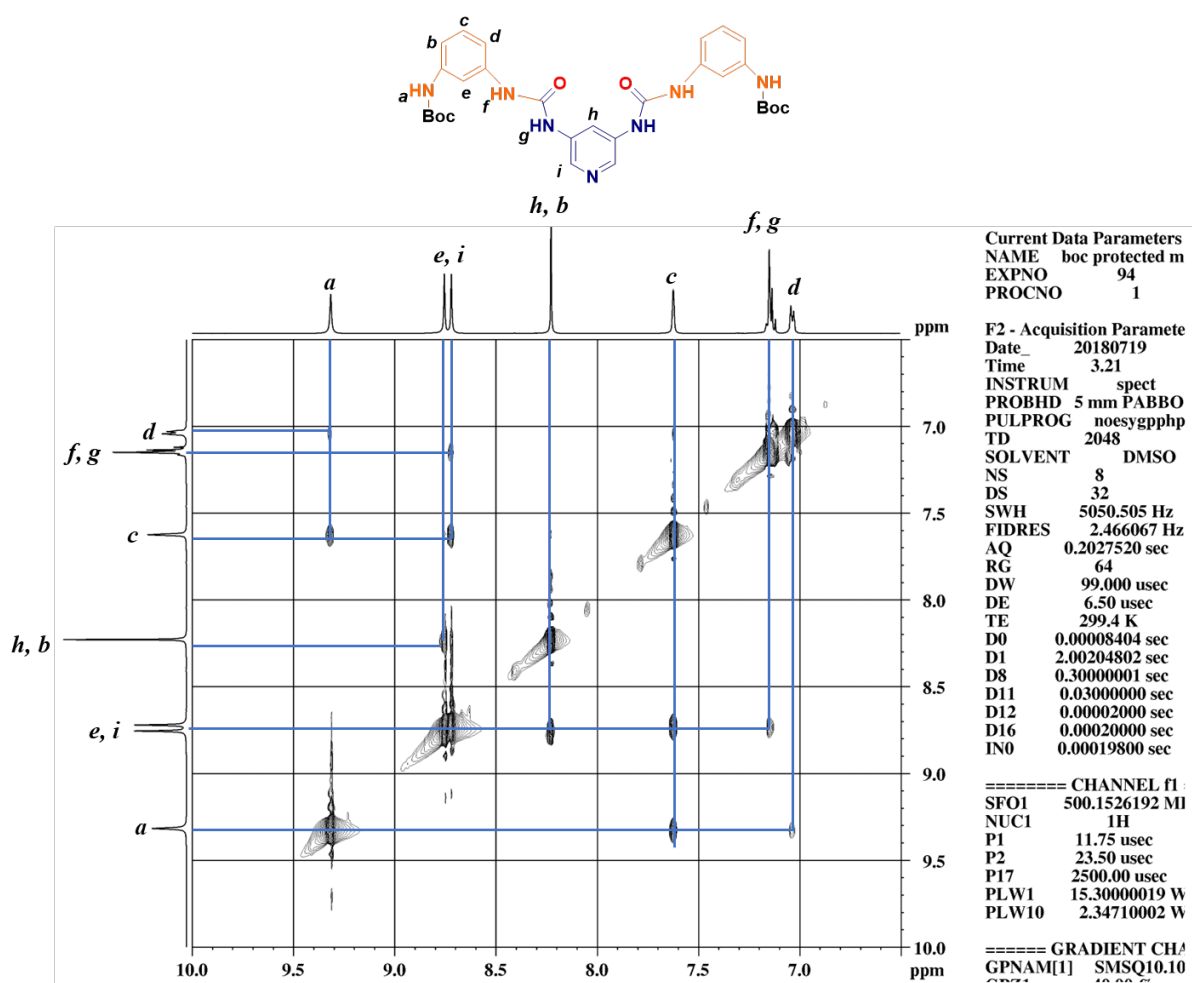

**Fig. S23** 500 MHz NOESY expansion spectrum of Intermediate **B** in DMSO-*d*<sub>6</sub>.

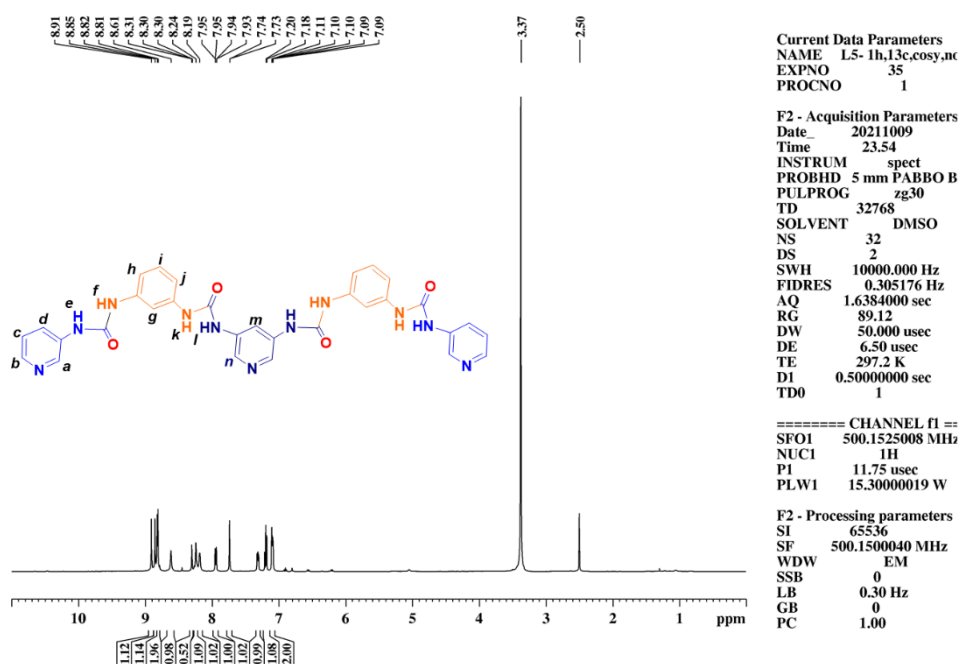

**Fig. S24** 400 MHz  $^1\text{H}$  NMR spectrum of ligand **L5** in  $\text{DMSO-}d_6$ .

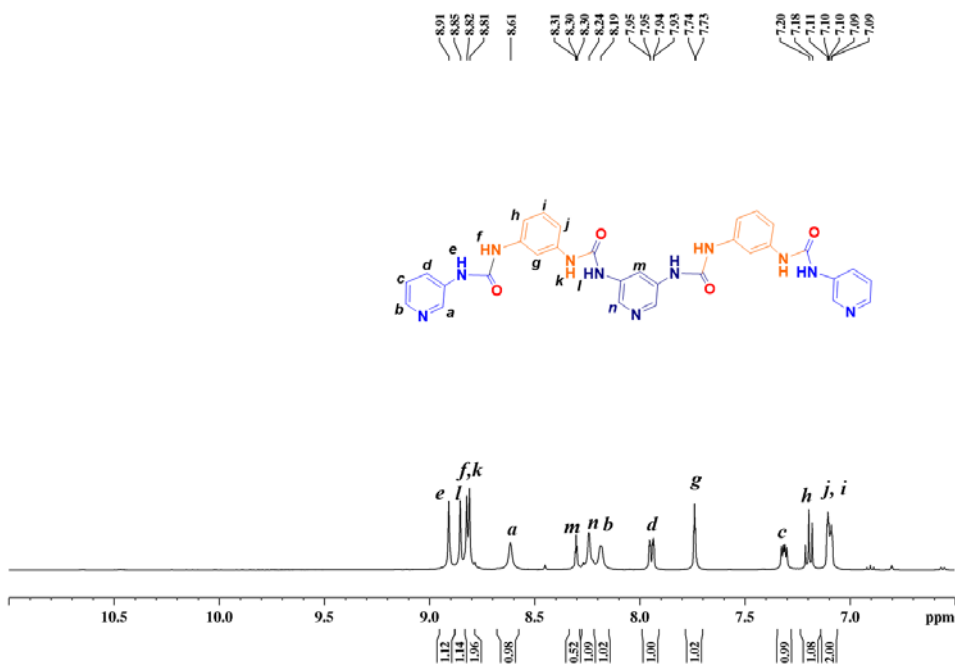

**Fig. S25** 400 MHz  $^1\text{H}$  NMR expansion spectrum of ligand **L5** in  $\text{DMSO-}d_6$ .

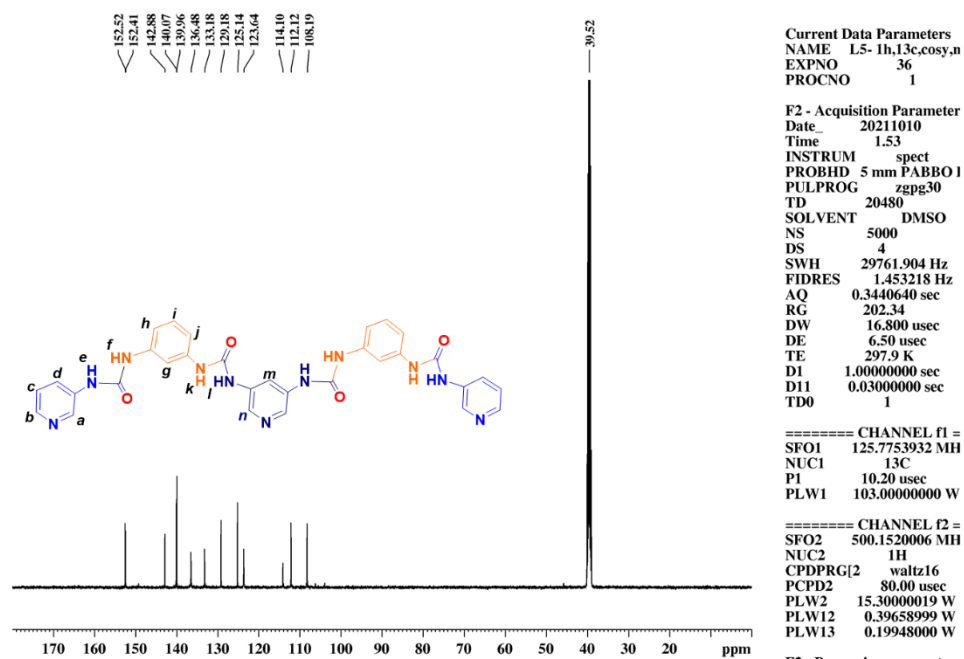

**Fig. S26** 125 MHz  $^{13}\text{C}$  NMR spectrum of ligand **L5** in  $\text{DMSO-}d_6$ .

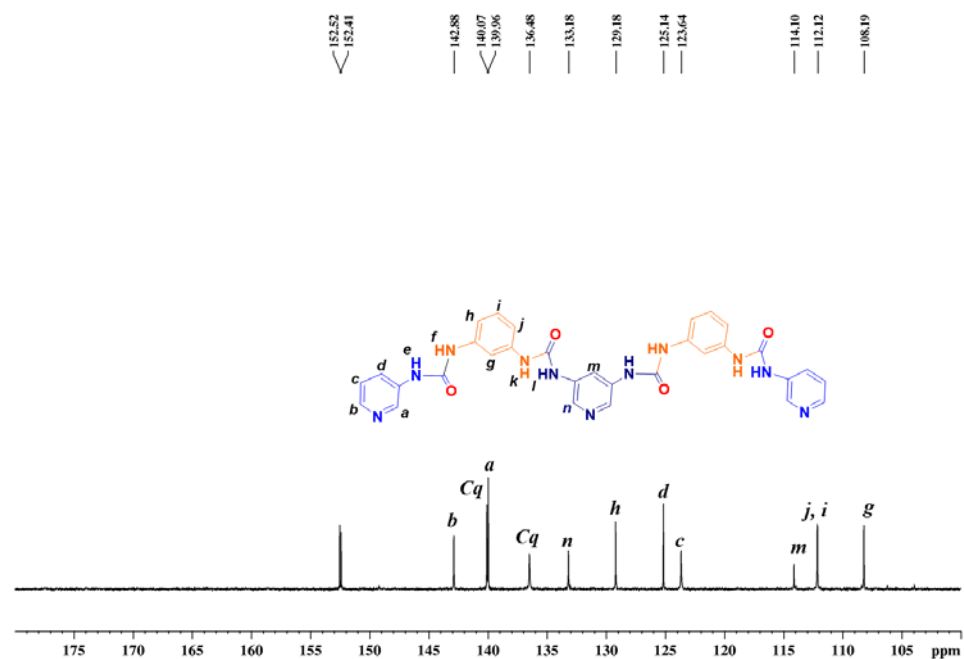

**Fig. S27** 125 MHz  $^{13}\text{C}$  NMR expansion spectrum of ligand **L5** in  $\text{DMSO-}d_6$ .

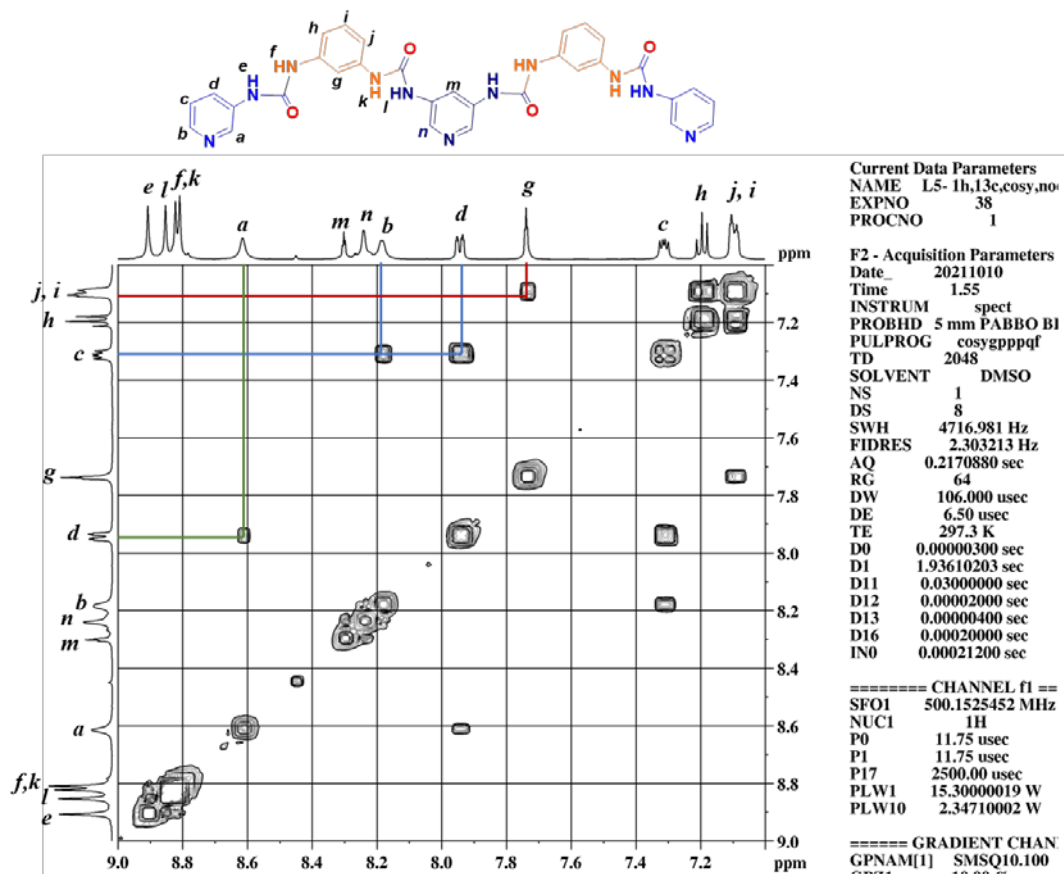

**Fig. S28** 500 MHz H-H COSY expansion spectrum of ligand **L5** in DMSO-*d*<sub>6</sub>.

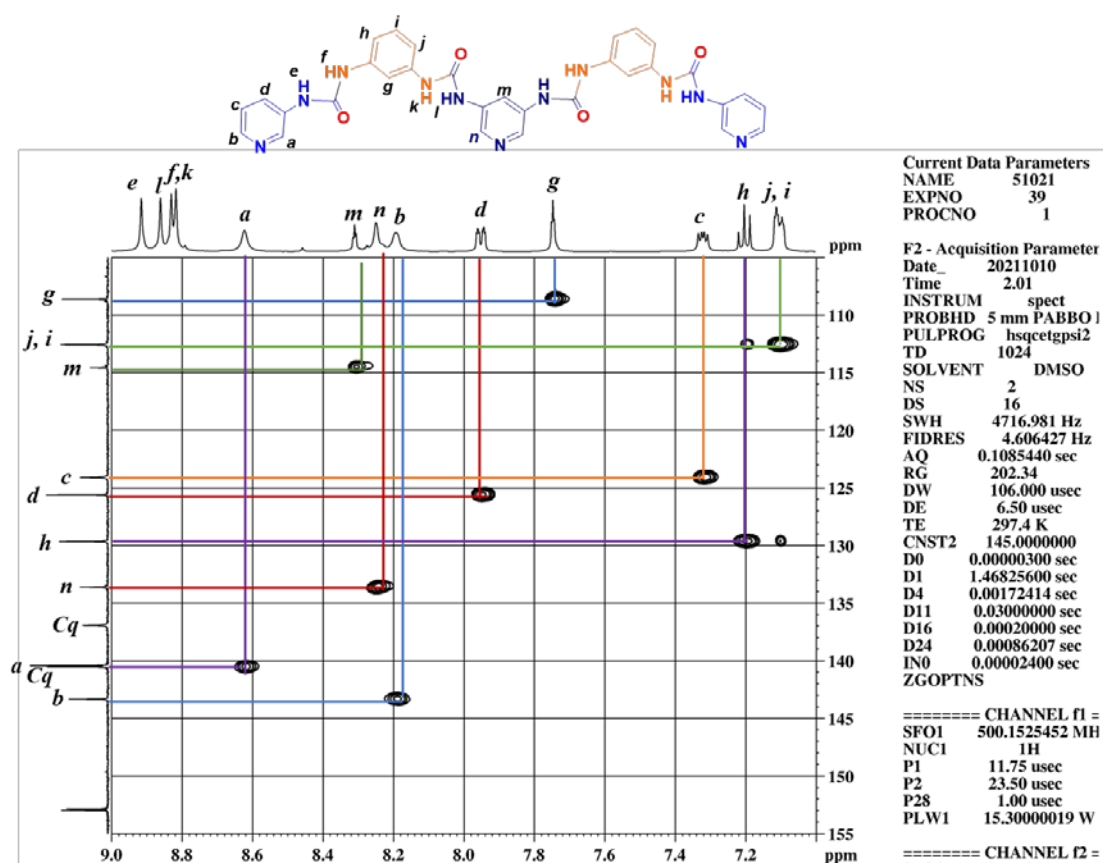

**Fig. S29** 500 MHz HSQC expansion spectrum of ligand **L5** in DMSO-*d*<sub>6</sub>.



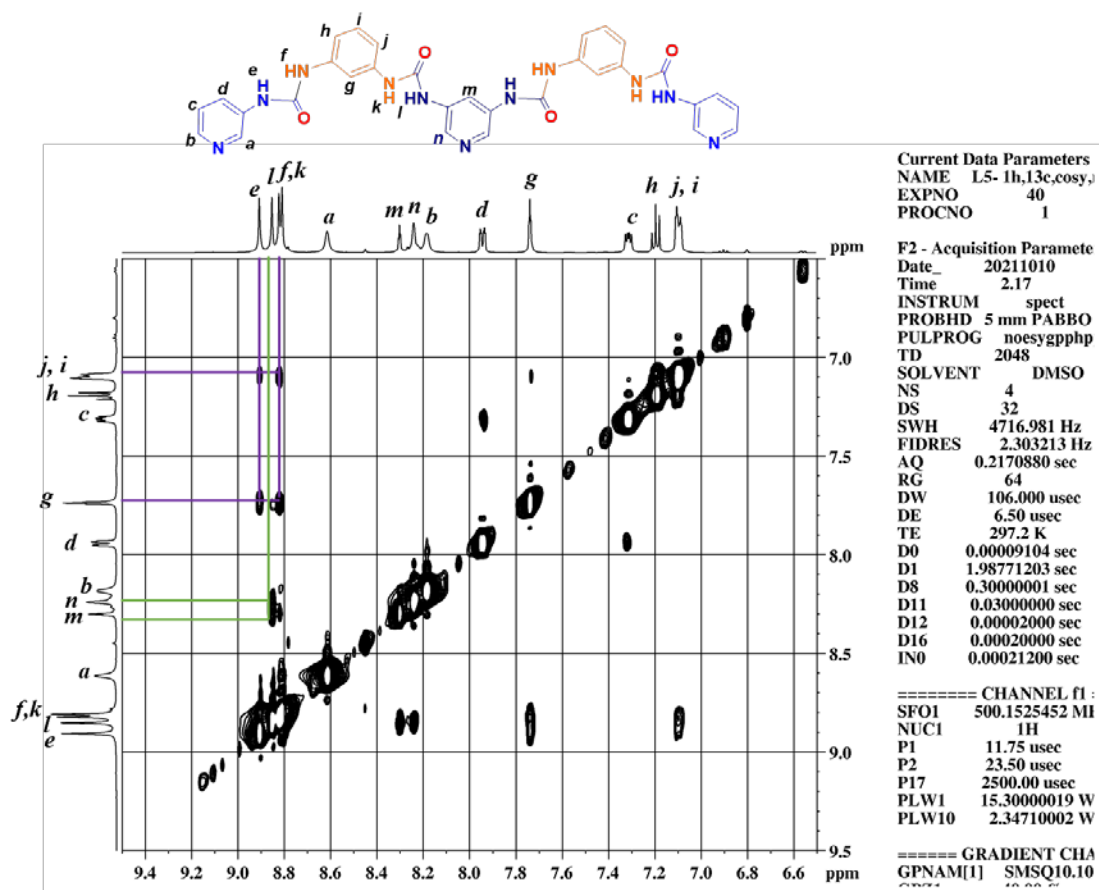

**Fig. S30** 500 MHz NOESY expansion spectrum of ligand **L5** in DMSO- $d_6$ .

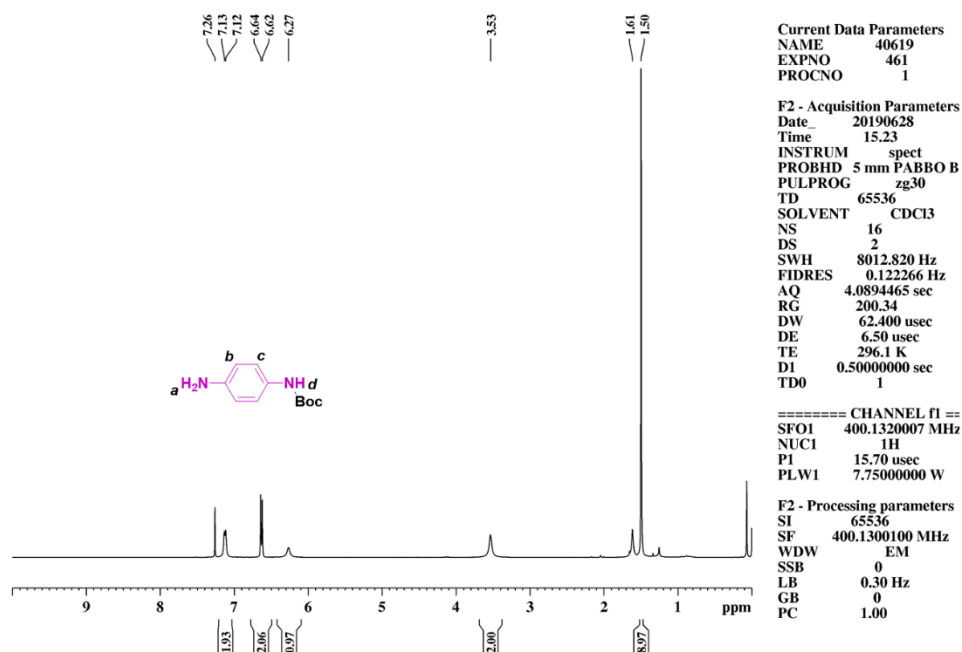

**Fig. S31** 400 MHz <sup>1</sup>H NMR spectrum of *N*-Boc-*p*-phenylenediamine in CDCl<sub>3</sub>.

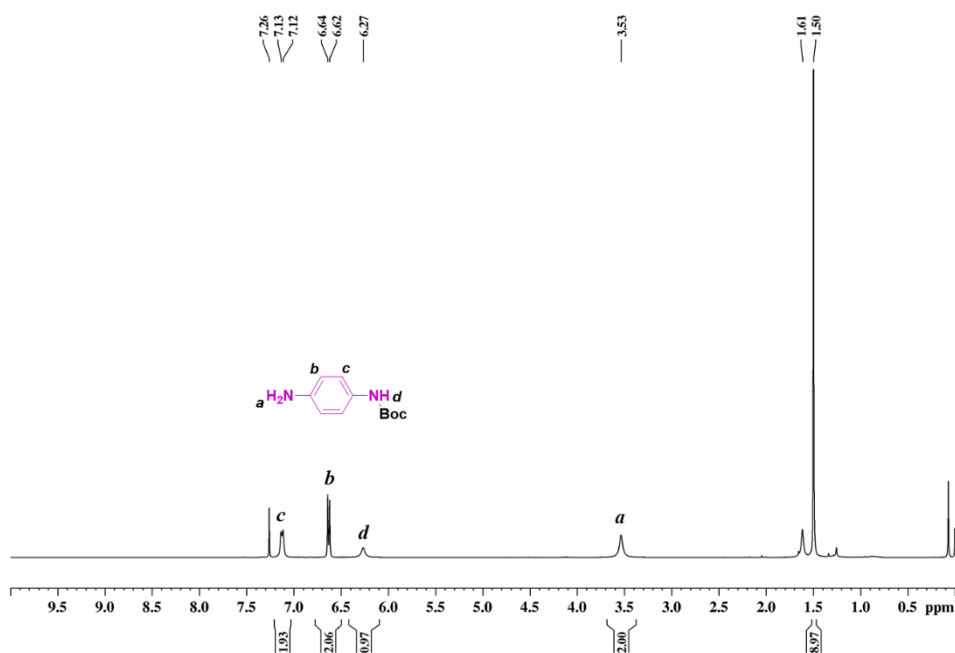

**Fig. S32** 400 MHz <sup>1</sup>H NMR expansion spectrum of *N*-Boc-*p*-phenylenediamine in CDCl<sub>3</sub>.

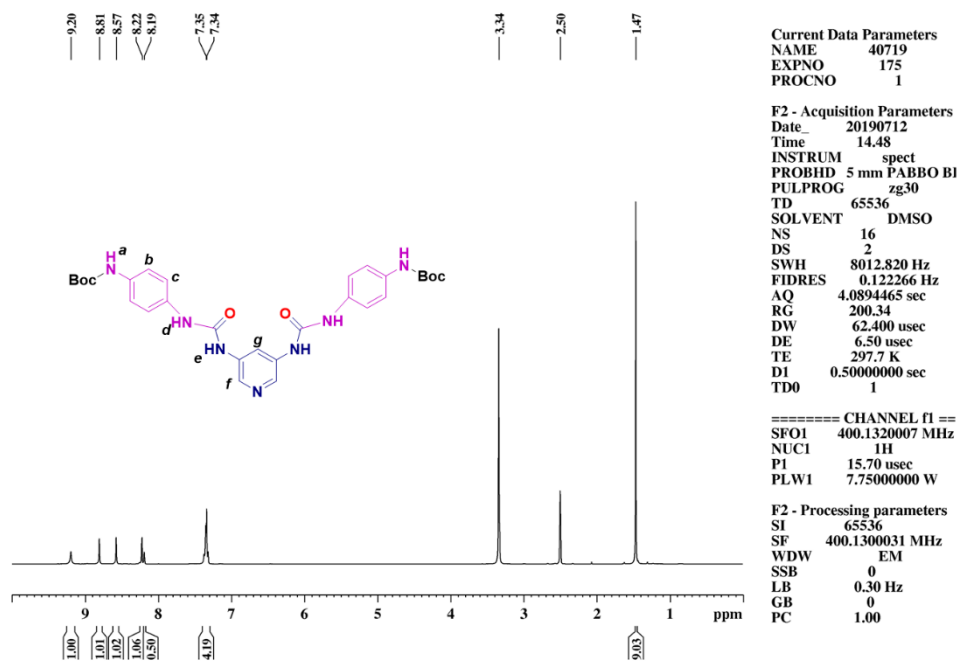

**Fig. S33** 400 MHz  $^1\text{H}$  NMR spectrum of Boc protected diamine **D** in  $\text{DMSO-}d_6$ .

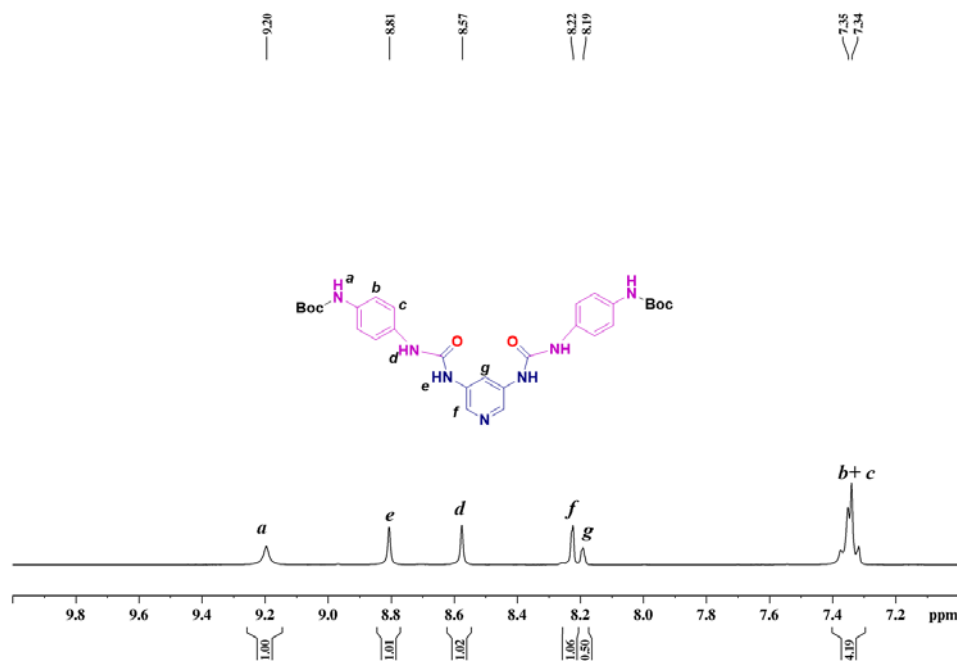

**Fig. S34** 400 MHz  $^1\text{H}$  NMR expansion spectrum of Boc protected diamine **D** in  $\text{DMSO-}d_6$ .

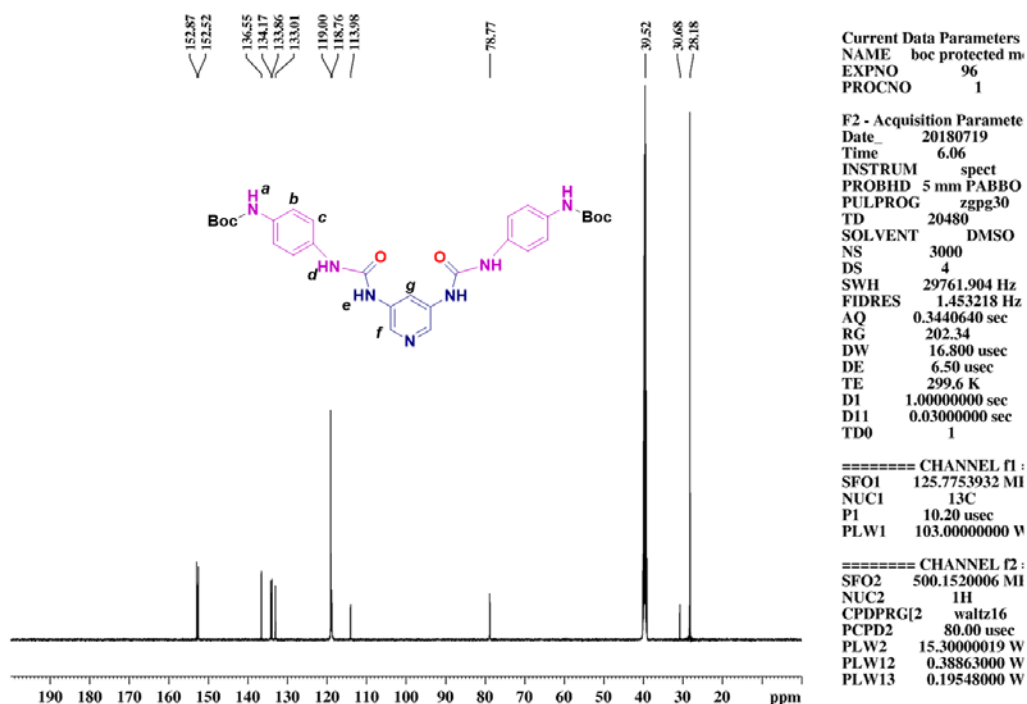

**Fig. S35** 125 MHz  $^{13}\text{C}$  NMR spectrum of Intermediate **D** in  $\text{DMSO}-d_6$ .

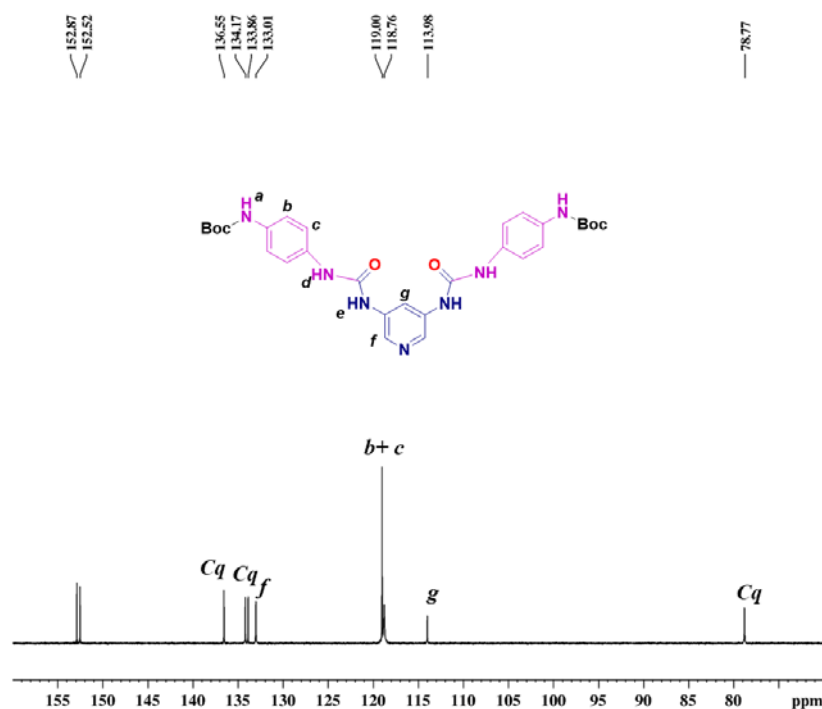

**Fig. S36** 125 MHz  $^{13}\text{C}$  NMR expansion spectrum of Intermediate **D** in  $\text{DMSO}-d_6$ .

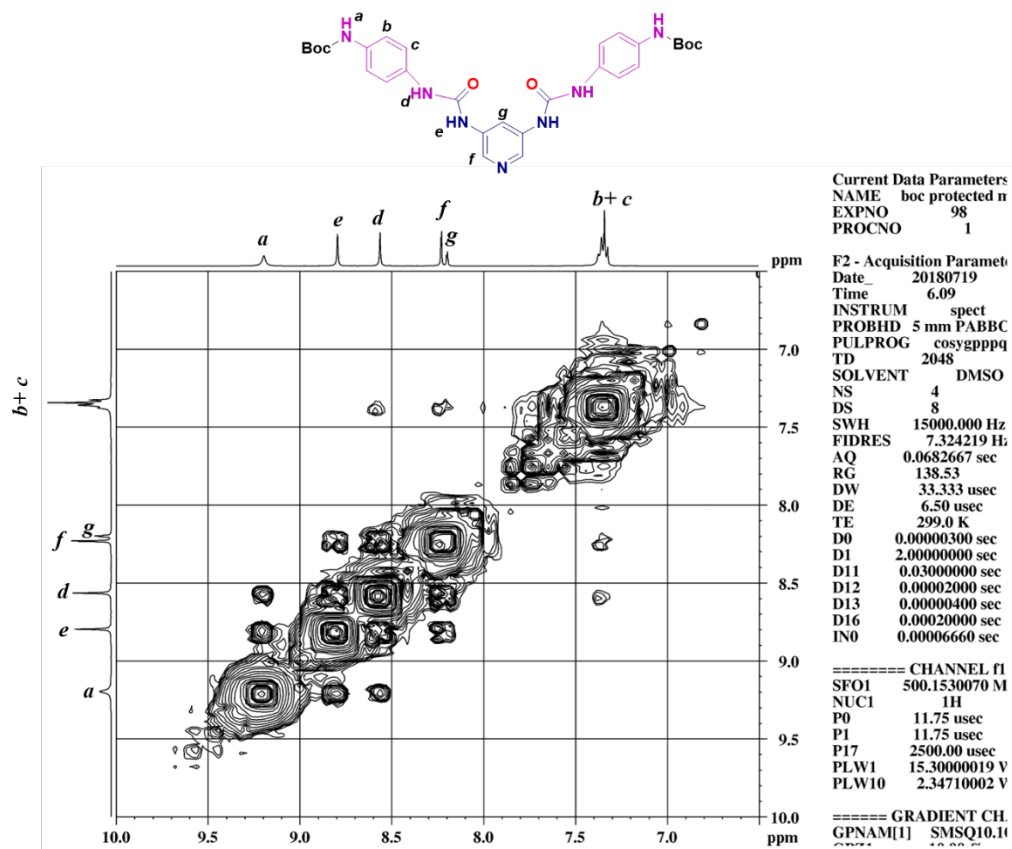

**Fig. S37** 500 MHz  $^1\text{H}$ - $^1\text{H}$  COSY expansion spectrum of Intermediate **D** in  $\text{DMSO}-d_6$ .

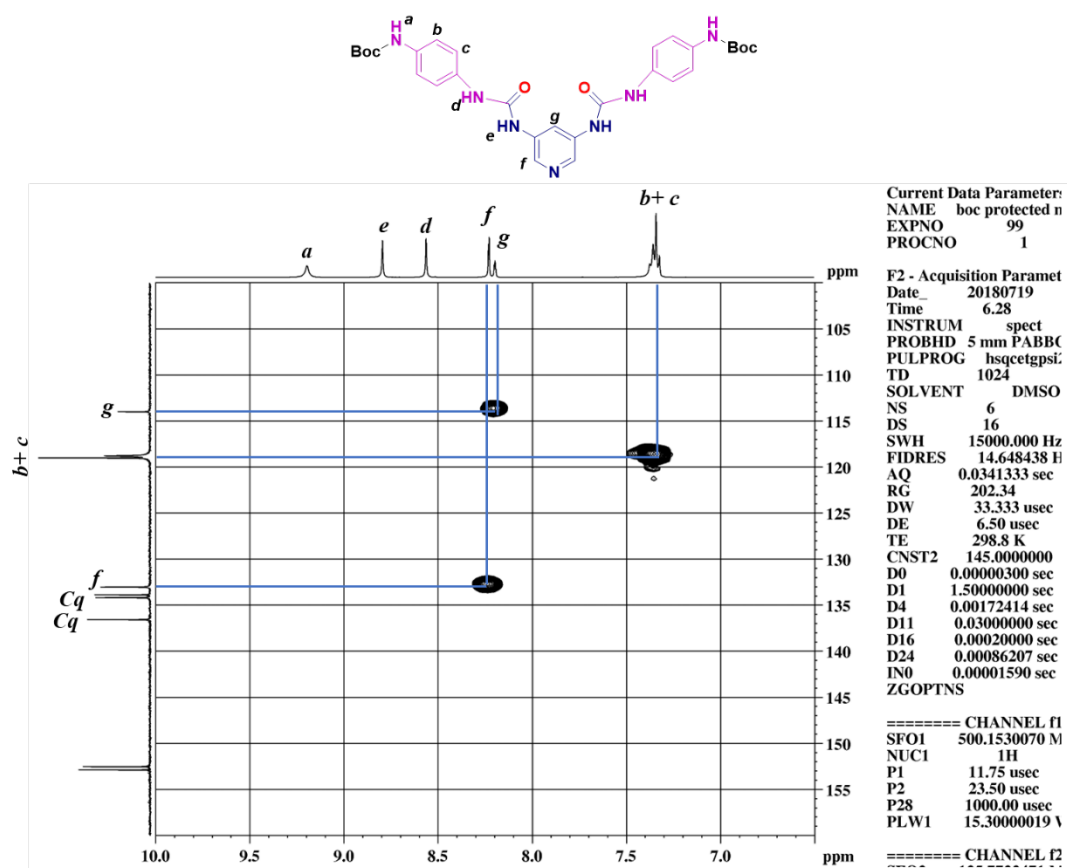

**Fig. S38** 500 MHz HSQC expansion spectrum of Intermediate **D** in DMSO-*d*<sub>6</sub>.

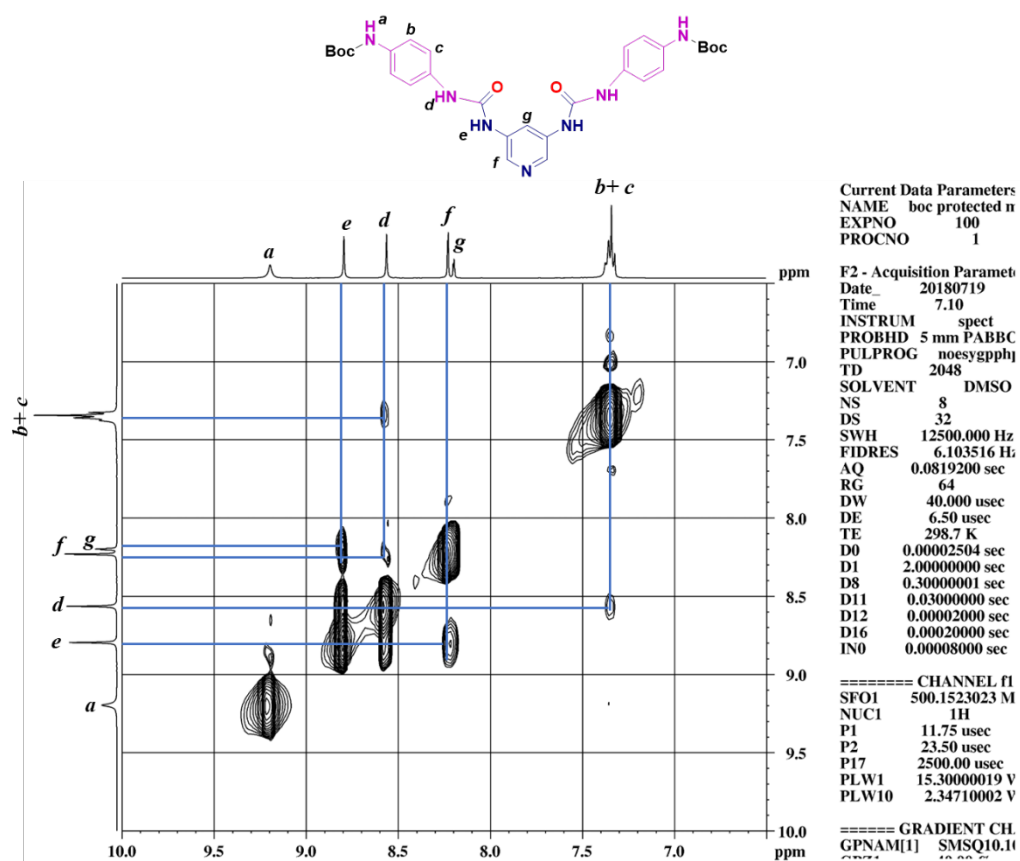

**Fig. S39** 500 MHz NOESY expansion spectrum of Intermediate **D** in DMSO-*d*<sub>6</sub>.

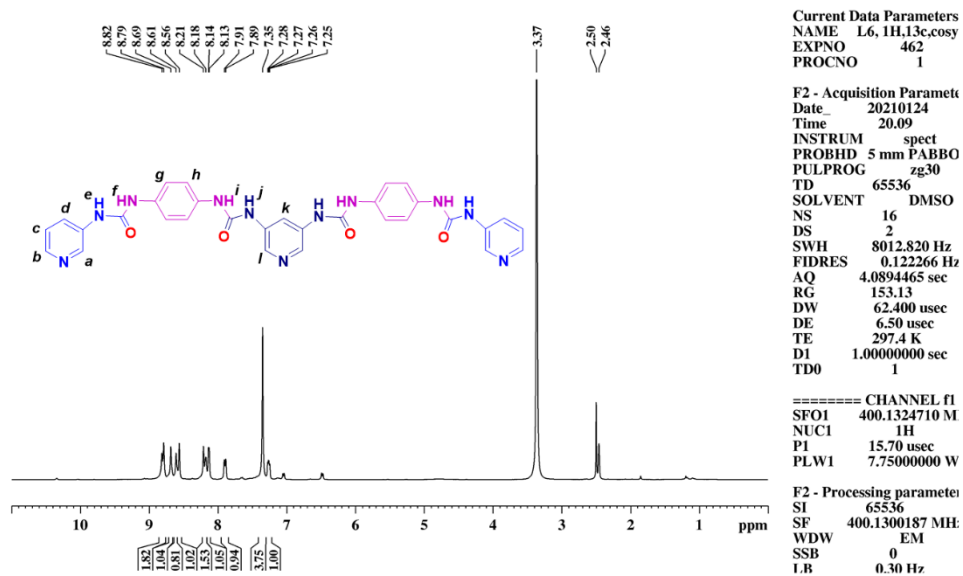

**Fig. S40** 400 MHz  $^1\text{H}$  NMR spectrum of ligand **L6** in  $\text{DMSO}-d_6$ .

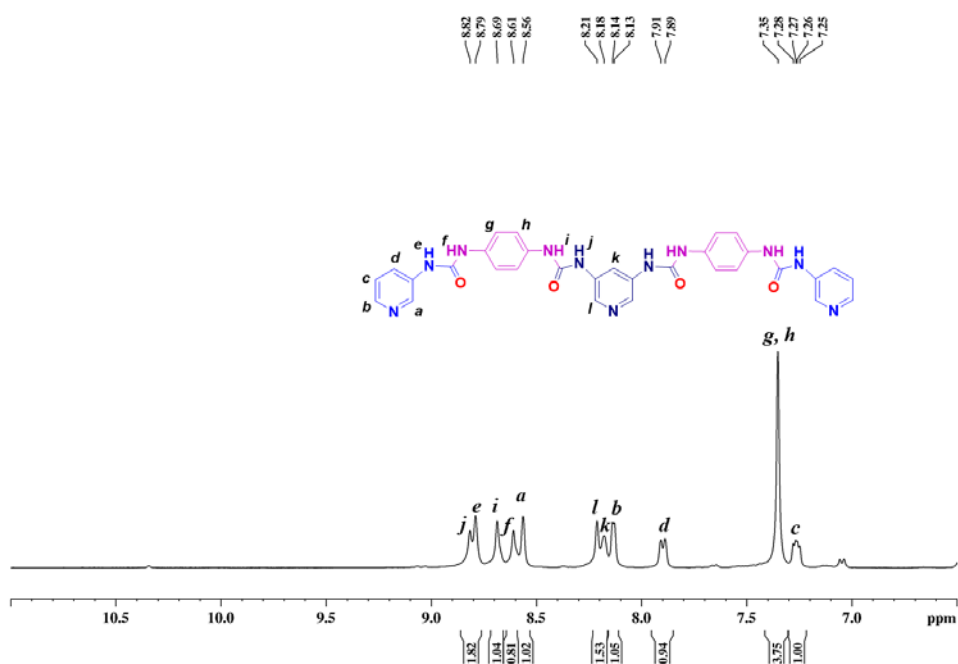

**Fig. S41** 400 MHz  $^1\text{H}$  NMR expansion spectrum of ligand **L6** in  $\text{DMSO}-d_6$ .



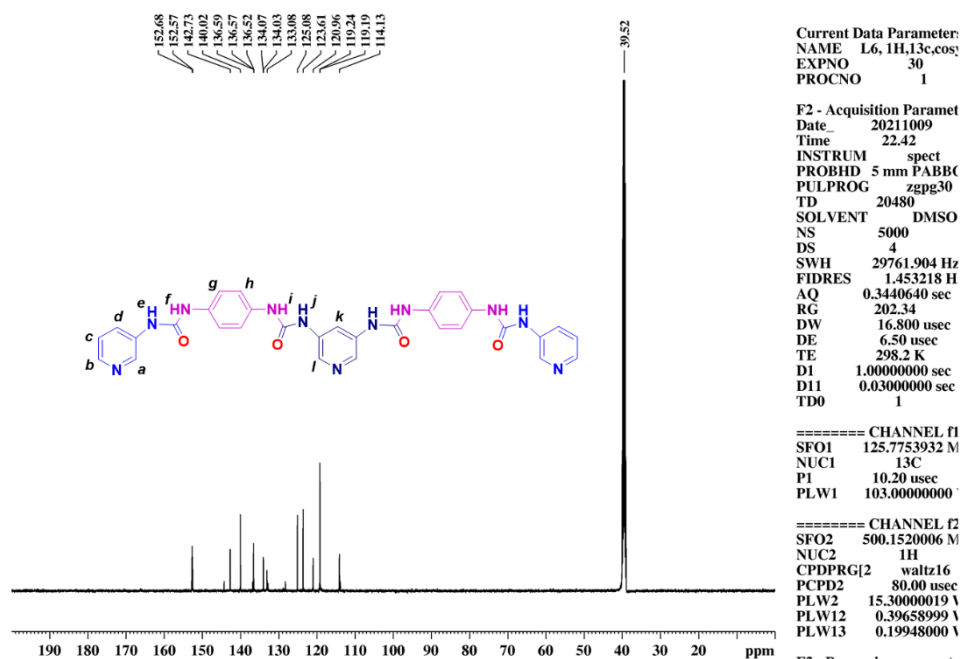

**Fig. S42** 125 MHz  $^{13}\text{C}$  NMR spectrum of ligand **L6** in  $\text{DMSO}-d_6$ .

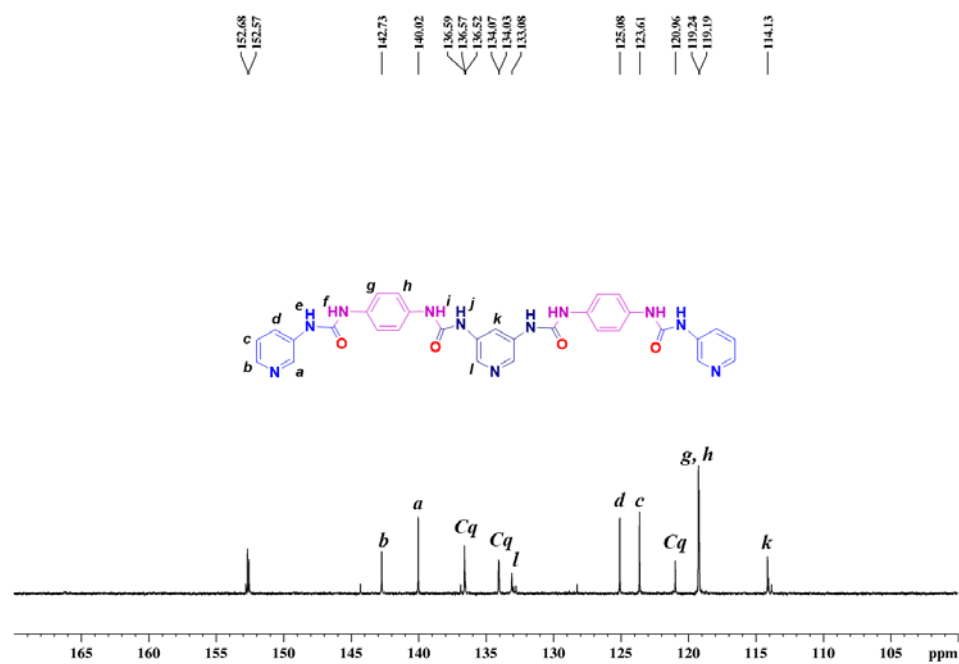

**Fig. S43** 125 MHz  $^{13}\text{C}$  NMR expansion spectrum of ligand **L6** in  $\text{DMSO}-d_6$ .

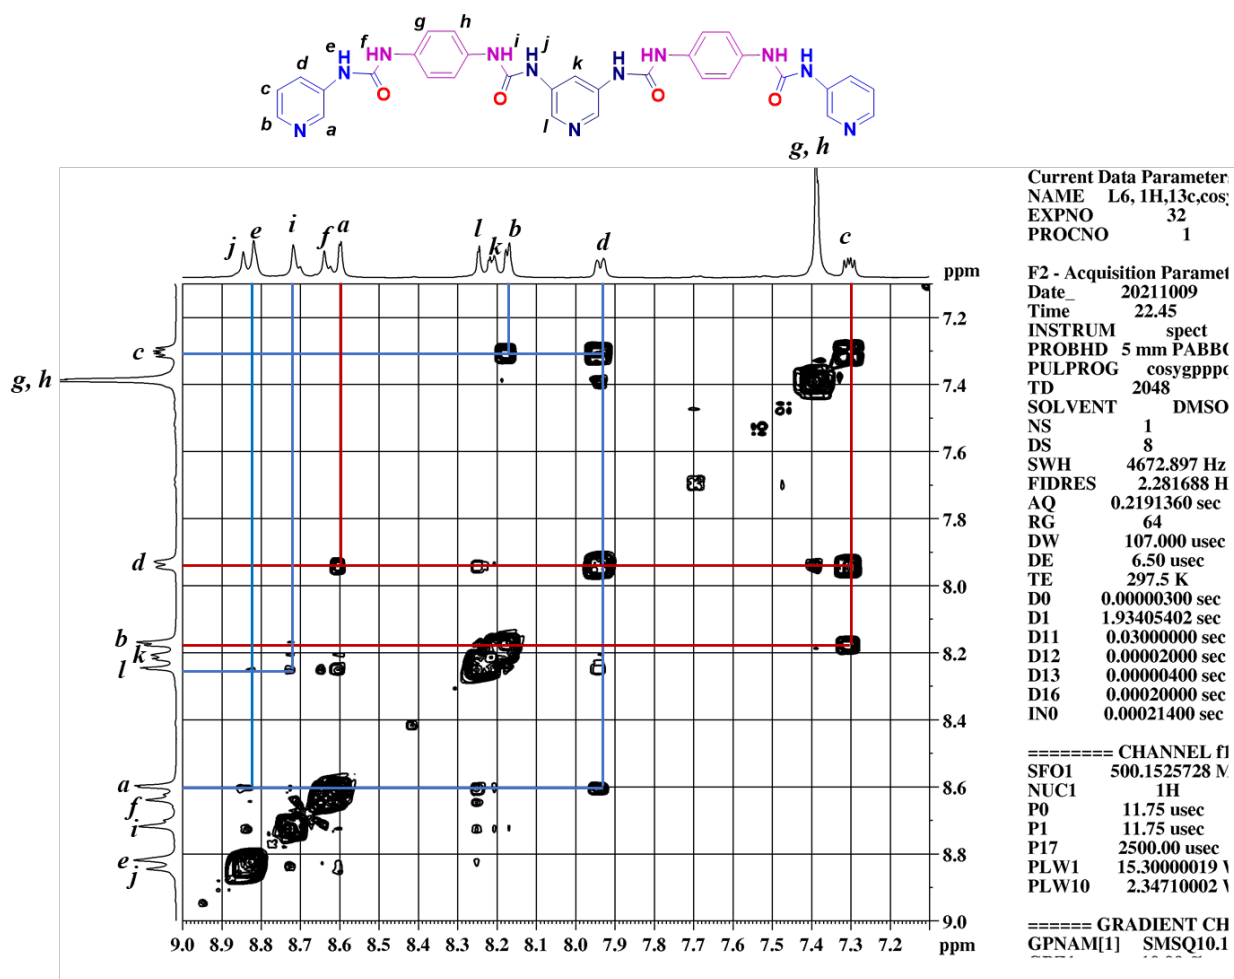

**Fig. S44** 500 MHz H-H COSY expansion spectrum of ligand **L6** in DMSO- $d_6$ .

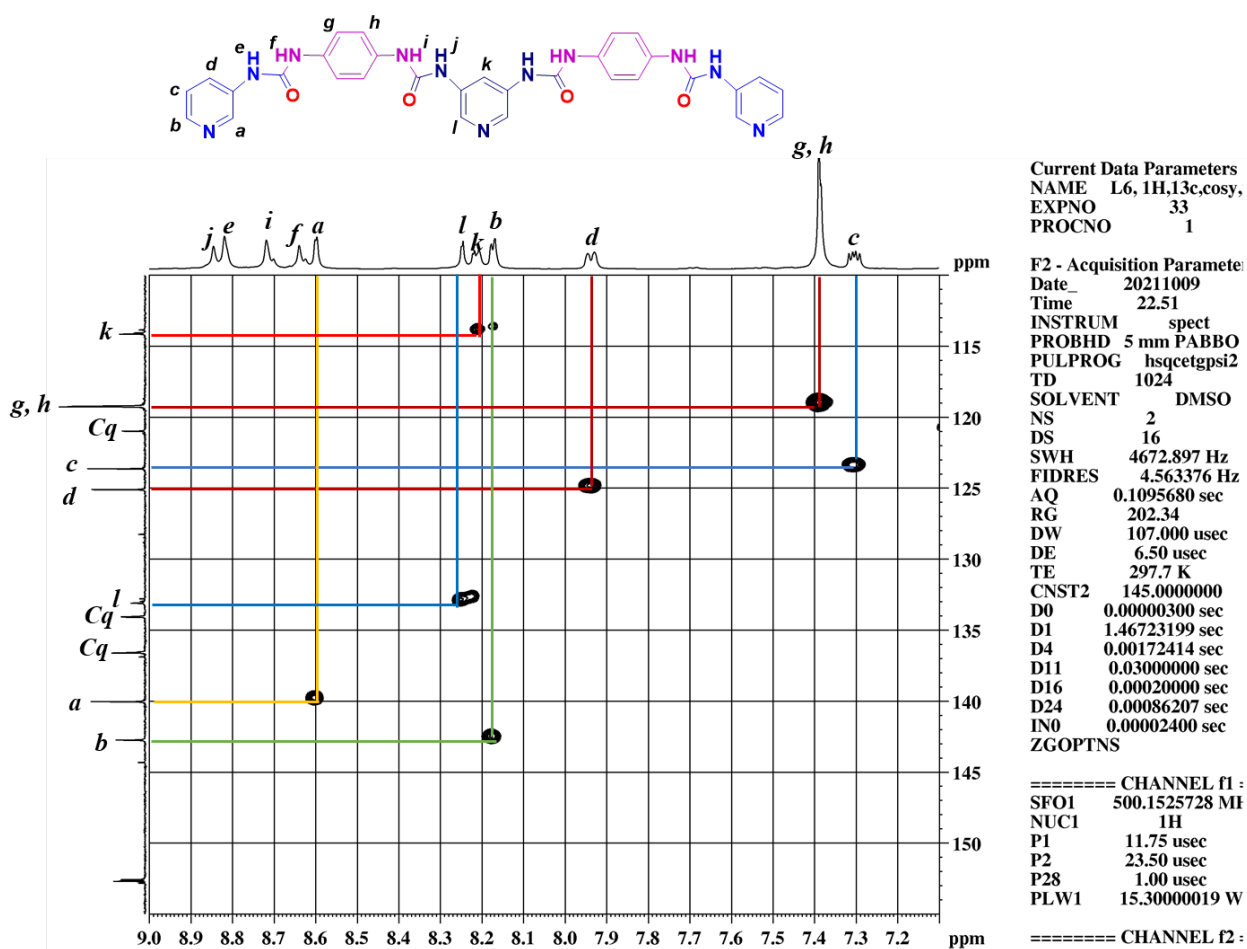

**Fig. S45** 500 MHz HSQC expansion spectrum of ligand **L6** in DMSO-*d*<sub>6</sub>.

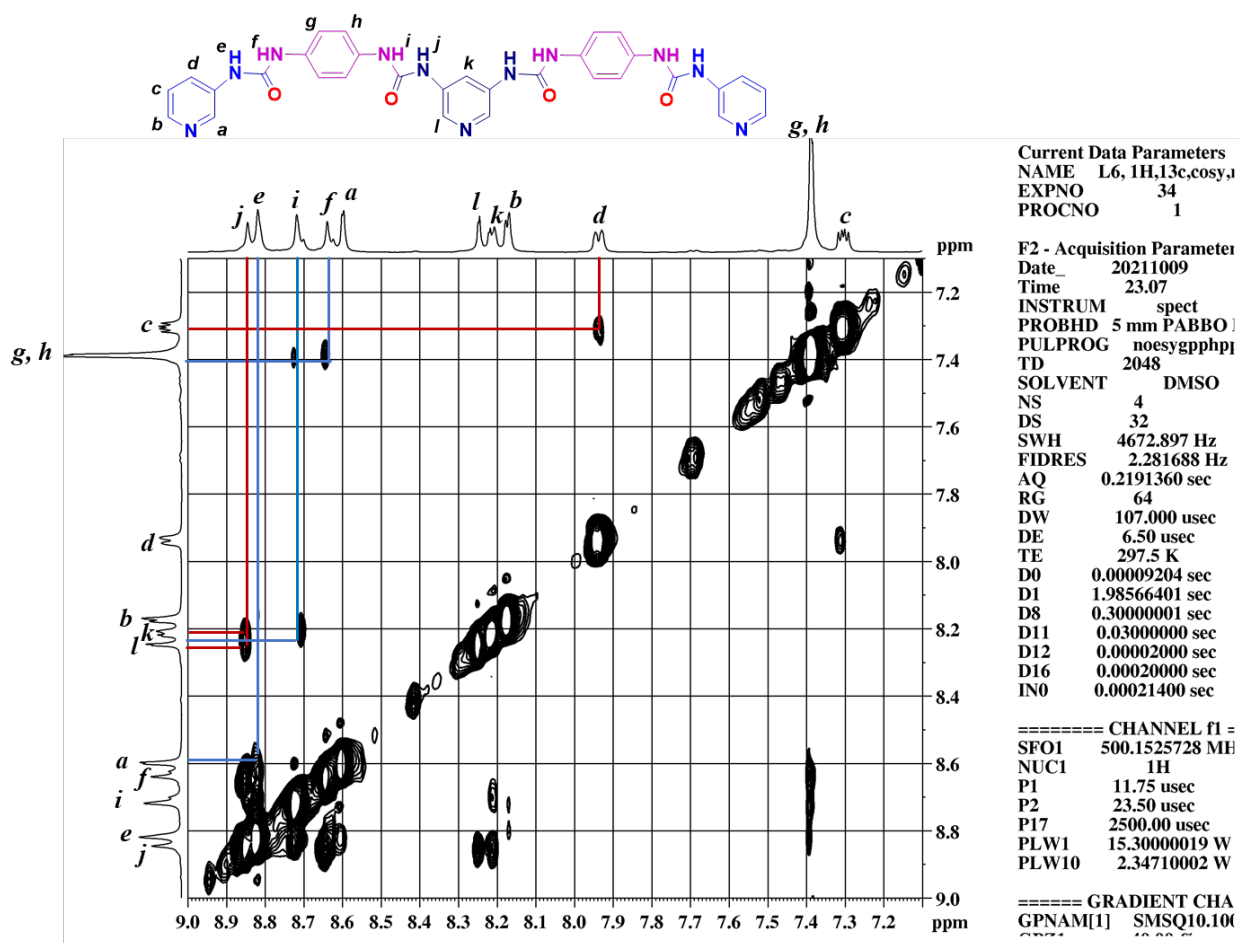

**Fig. S46** 500 MHz NOESY expansion spectrum of ligand **L6** in DMSO-*d*<sub>6</sub>.

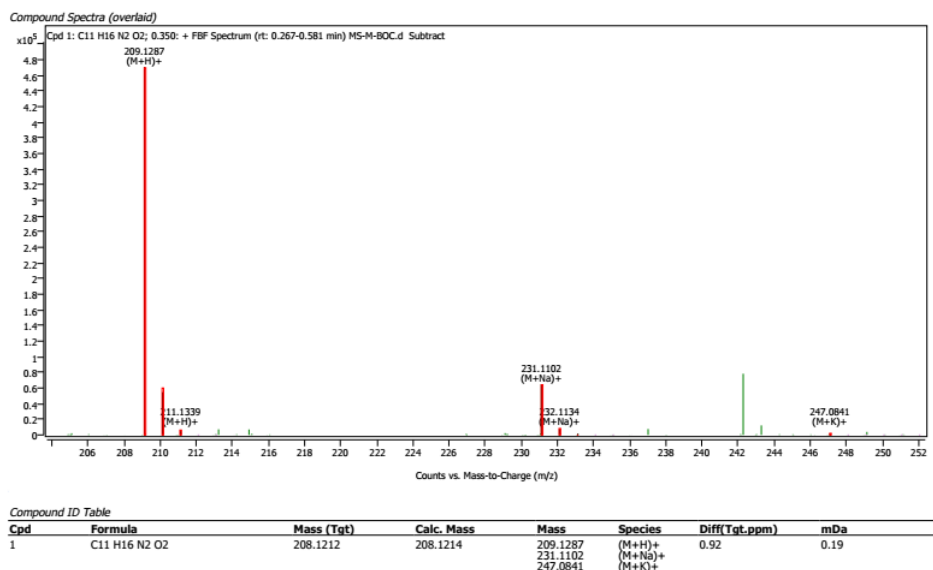

**Fig. S47** ESI-HRMS spectrum of *N*-Boc-*m*-phenylenediamine.

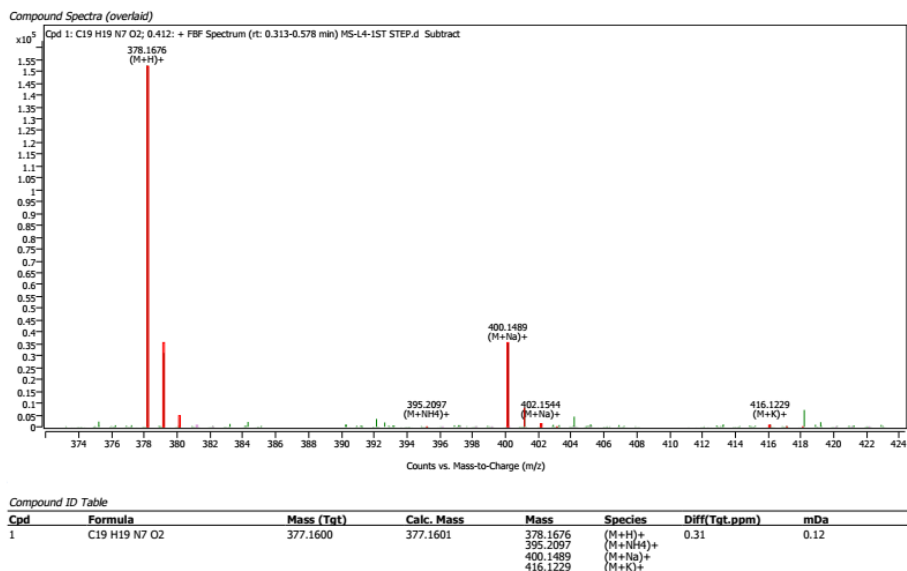

**Fig. S48** ESI-HRMS spectrum of diamine **A**.

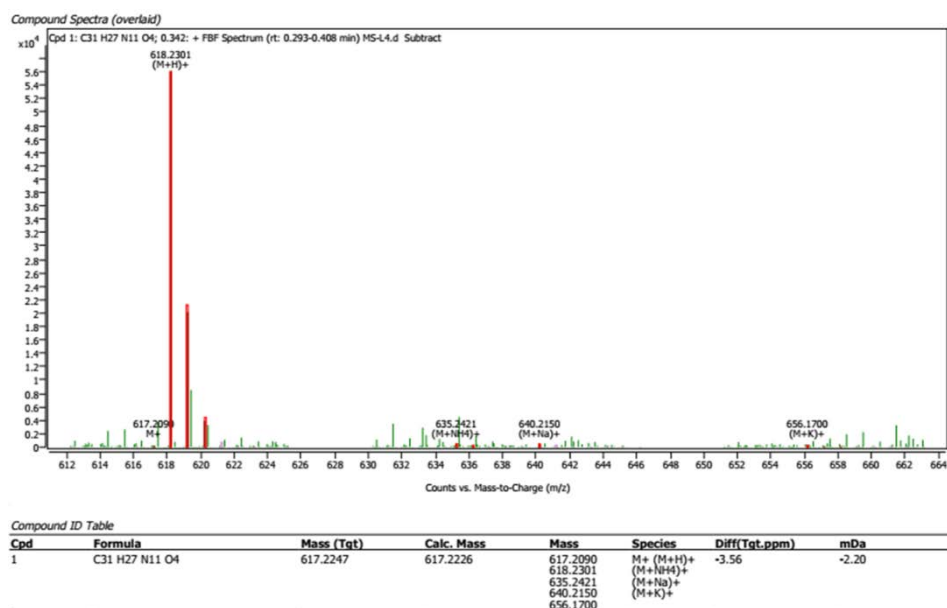

**Fig. S49** ESI-HRMS spectrum of ligand **L4**.

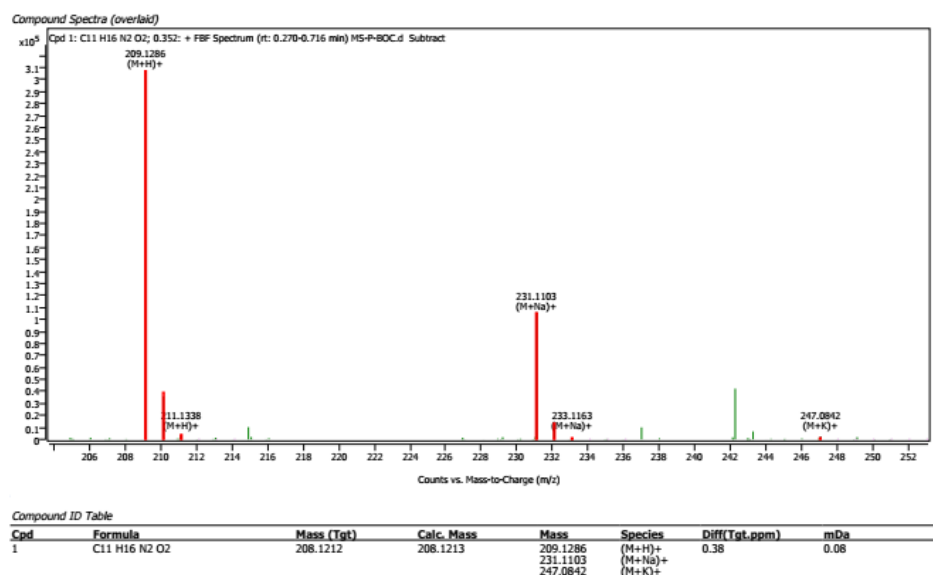

**Fig. S50** ESI-HRMS spectrum of *N*-Boc-*p*-phenylenediamine.

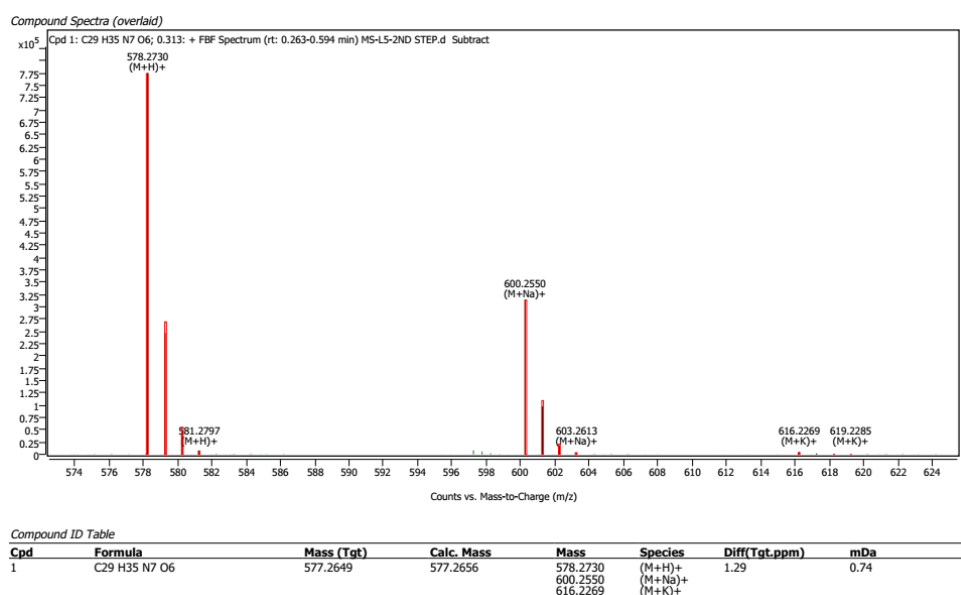

**Fig. S51** ESI-HRMS spectrum of intermediate **B**.

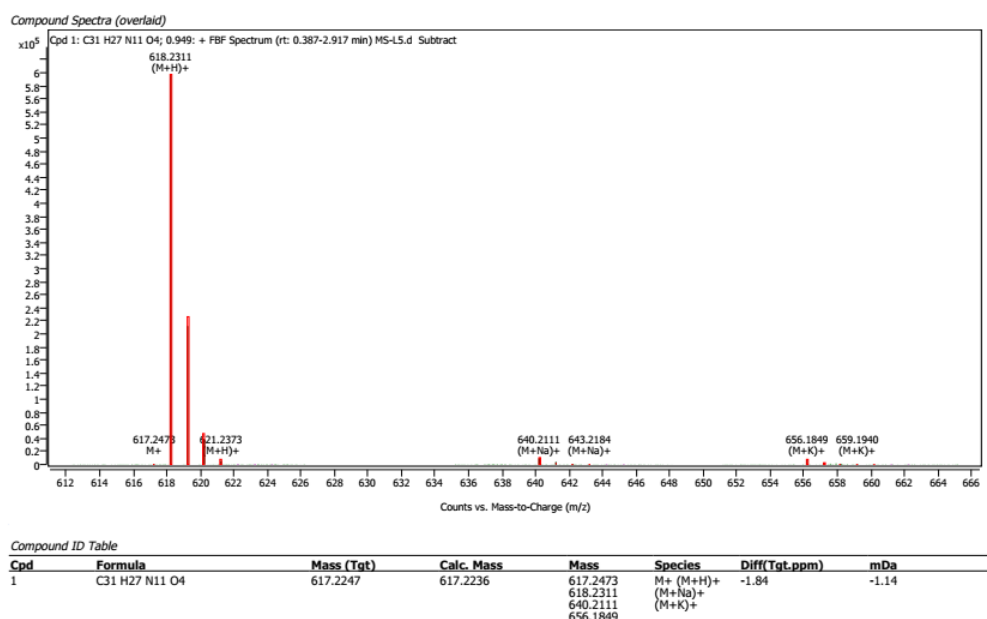

**Fig. S52** ESI-HRMS spectrum of ligand **L5**.

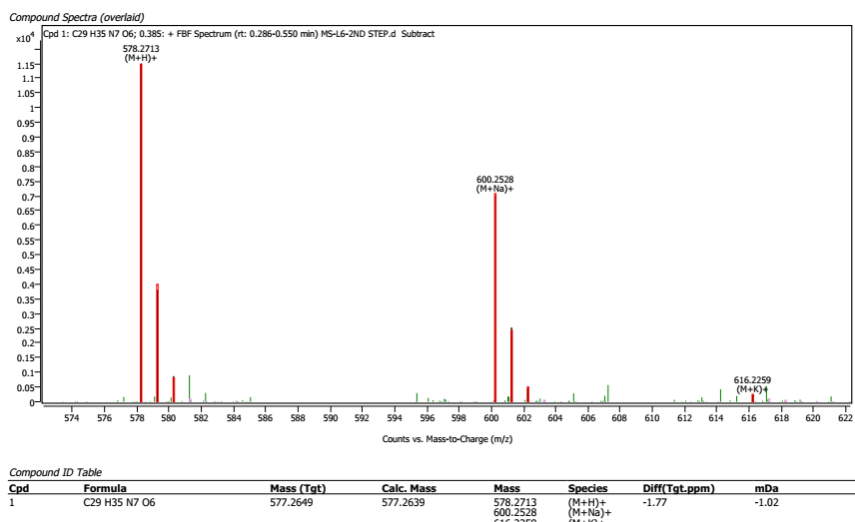

**Fig. S53** ESI-HRMS spectrum of intermediate **D**.

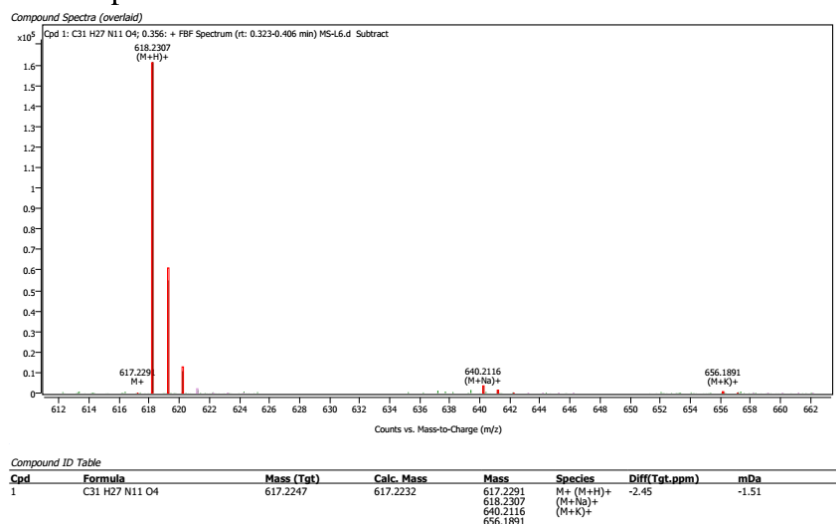

**Fig. S54** ESI-HRMS spectrum of ligand **L6**.

### 3. Synthesis and characterization of Pd<sub>3</sub>L<sub>4</sub> type complexes

#### Complexation of Pd(NO<sub>3</sub>)<sub>2</sub> with ligands **L4**, **L5**, and **L6** in 3:4 metal to ligand ratio

To a solution of commercially available Pd(NO<sub>3</sub>)<sub>2</sub> (8.07 mg, 0.04 mmol) in DMSO (7 mL), ligand **L4** (28.82 mg, 0.05 mmol) was added and the reaction mixture was stirred at 70 °C for 16 h to allow the complexation reaction. The desired complexes **4a** and **4a'** were precipitated from the clear solution so obtained using excess ethyl acetate, which were separated by centrifugation method. The isolated solid was washed with ethyl acetate and vacuum dried to afford the cage **4a** and **4a'** as white solid. The cages **5b**, **5b'**, and **6a** were prepared in a similar



manner by the complexation of  $\text{Pd}(\text{CH}_3\text{CN})_4(\text{BF}_4)_2$  and  $\text{Pd}(\text{NO}_3)_2$  solution in DMSO with ligands **L5** and **L6**, respectively in separate experiments.

**[Pd<sub>3</sub>(L4)<sub>4</sub>](NO<sub>3</sub>)<sub>6</sub> (4a and 4a').** Yield: (33.73 mg, 80%). Melting point = 260 °C. <sup>1</sup>H NMR (500 MHz, DMSO-*d*<sub>6</sub>)  $\delta$  = 9.63 (s, 16H, H<sub>l</sub><sup>D</sup> and H<sub>l</sub><sup>H</sup>), 9.57 (s, 16H, H<sub>e</sub><sup>D</sup> and H<sub>e</sub><sup>H</sup>), 9.32 (s, 8H, H<sub>a</sub><sup>H</sup>), 8.86-8.82 (m, 32H, H<sub>a</sub><sup>D</sup>, H<sub>b</sub><sup>H</sup>, H<sub>n</sub><sup>H</sup>, and H<sub>n</sub><sup>D</sup>), 8.70 (s, 8H, H<sub>m</sub><sup>D</sup>, and H<sub>m</sub><sup>H</sup>), 8.56 (brs, 16H, H<sub>f</sub><sup>H</sup> and H<sub>k</sub><sup>H</sup>), 8.22-8.17 (m, 40H, H<sub>b</sub><sup>D</sup>, H<sub>d</sub><sup>D</sup>, H<sub>d</sub><sup>H</sup>, H<sub>f</sub><sup>D</sup>, and H<sub>k</sub><sup>D</sup>), 7.76 (brs, 16H, H<sub>g</sub><sup>H</sup> and H<sub>j</sub><sup>H</sup>), 7.62-7.52 (m, 32H, H<sub>c</sub><sup>D</sup>, H<sub>c</sub><sup>H</sup>, H<sub>g</sub><sup>D</sup>, and H<sub>j</sub><sup>D</sup>), 7.20-7.11 (m, 32H, H<sub>h</sub><sup>D</sup>, H<sub>h</sub><sup>H</sup>, H<sub>j</sub><sup>D</sup>, and H<sub>i</sub><sup>H</sup>) ppm (D and H denote double decker and hour-glass shaped Pd<sub>3</sub>L<sub>4</sub> cages, respectively). ESI-MS: *m/z* calculated for [4a-3NO<sub>3</sub>]<sup>3+</sup> and [4a-4NO<sub>3</sub>]<sup>4+</sup> are 991.8602 and 728.3983; observed, 991.8531 and 728.3911.

**[Pd<sub>3</sub>(L5)<sub>4</sub>](BF<sub>4</sub>)<sub>6</sub> (5b and 5b').** Yield: (33.70 mg, 82%). Melting point = 235 °C. <sup>1</sup>H NMR (500 MHz, DMSO-*d*<sub>6</sub>)  $\delta$  = 9.73 (s, 8H, H<sub>a</sub><sup>H</sup>), 9.62 (s, 8H, H<sub>a</sub><sup>D</sup>), 9.32 (s, 8H, H<sub>n</sub><sup>D</sup>), 9.13 (d, *J* = 4.87 Hz, 8H, H<sub>b</sub><sup>H</sup>), 9.01 (brs, 16H, H<sub>e</sub><sup>D</sup> and H<sub>e</sub><sup>H</sup>), 8.94-8.91 (m, 24H, H<sub>f</sub><sup>D</sup>, and H<sub>b</sub><sup>D</sup>), 8.87 (s, 8H, H<sub>n</sub><sup>H</sup>), 8.85 (s, 8H, H<sub>l</sub><sup>H</sup>), 8.80 (s, 8H, H<sub>l</sub><sup>D</sup>), 8.74 (brs, 8H, H<sub>m</sub><sup>D</sup> and H<sub>m</sub><sup>H</sup>), 8.61 (s, 8H, H<sub>k</sub><sup>H</sup>), 8.58 (s, 8H, H<sub>k</sub><sup>D</sup>), 8.09-7.07 (m, 16H, H<sub>d</sub><sup>H</sup> and H<sub>d</sub><sup>D</sup>), 7.68 (s, 8H, H<sub>g</sub><sup>D</sup>), 7.61-7.58 (m, 16H, H<sub>c</sub><sup>H</sup> and H<sub>c</sub><sup>D</sup>), 7.52-7.50 (m, 16H, H<sub>g</sub><sup>H</sup> and H<sub>j</sub><sup>D</sup>), 7.23-7.12 (m, 40H, H<sub>h</sub><sup>D</sup>, H<sub>h</sub><sup>H</sup>, H<sub>j</sub><sup>D</sup>, H<sub>i</sub><sup>H</sup> and H<sub>j</sub><sup>H</sup>) ppm (D and H denote double decker and hour-glass shaped Pd<sub>3</sub>L<sub>4</sub> cages, respectively). ESI-MS: *m/z* calculated for [5b-6BF<sub>4</sub>]<sup>6+</sup>, [5b-5BF<sub>4</sub>]<sup>5+</sup>, and [5b-4BF<sub>4</sub>]<sup>4+</sup> are 464.9350, 575.3244, and 740.6561; observed, 464.9367, 575.3249, and 740.6561.

**[Pd<sub>3</sub>(L6)<sub>4</sub>](NO<sub>3</sub>)<sub>6</sub> (6a).** Yield: (34.94 mg, 85%). Melting point = 275 °C. <sup>1</sup>H NMR (500 MHz, DMSO-*d*<sub>6</sub>)  $\delta$  = 10.18 (s, 8H, H<sub>a</sub><sup>D</sup>), 9.87 (s, 8H, H<sub>l</sub><sup>D</sup>), 9.21-9.12 (m, 16H, H<sub>j</sub><sup>D</sup> and H<sub>e</sub><sup>D</sup>), 9.06 (d, *J* = 5.22 Hz, 8H, H<sub>b</sub><sup>D</sup>), 8.97-8.92 (m, 20H, H<sub>f</sub><sup>D</sup>, H<sub>k</sub><sup>D</sup> and H<sub>i</sub><sup>D</sup>), 7.59-7.44 (m, 48H, H<sub>c</sub><sup>D</sup>, H<sub>d</sub><sup>D</sup>, H<sub>g</sub><sup>D</sup> and H<sub>h</sub><sup>D</sup>) ppm (D denotes double decker Pd<sub>3</sub>L<sub>4</sub> cage). ESI-MS: *m/z* calculated for [6a-6NO<sub>3</sub>]<sup>6+</sup> and [6a-5NO<sub>3</sub>]<sup>5+</sup> are 464.9367 and 570.3212; observed, 464.9326 and 570.3165.

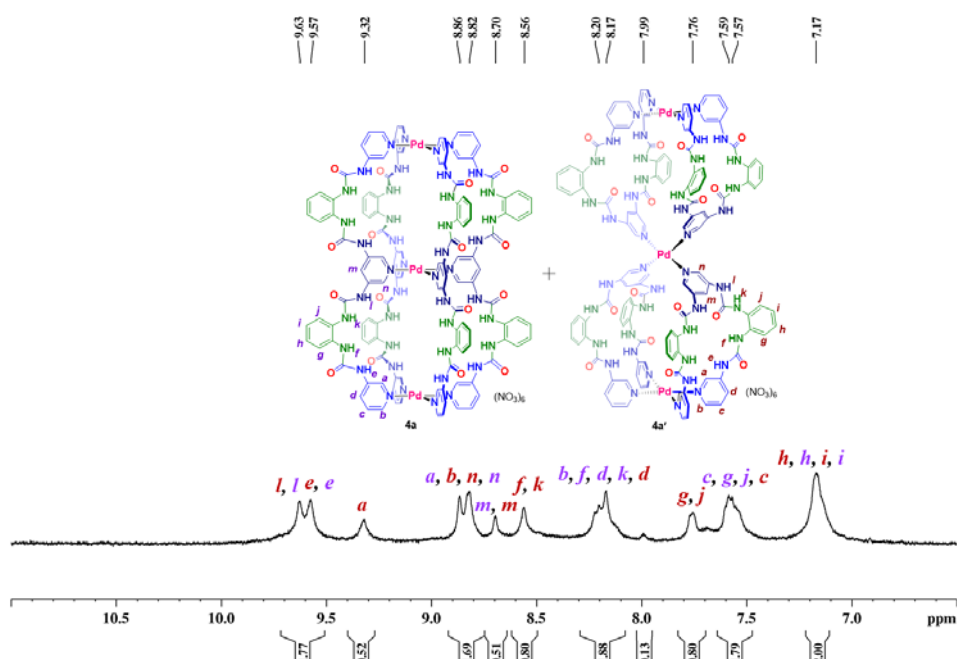

**Fig. S55** 400 MHz  $^1\text{H}$  NMR spectrum of cages **4a** and **4a'** in  $\text{DMSO-}d_6$

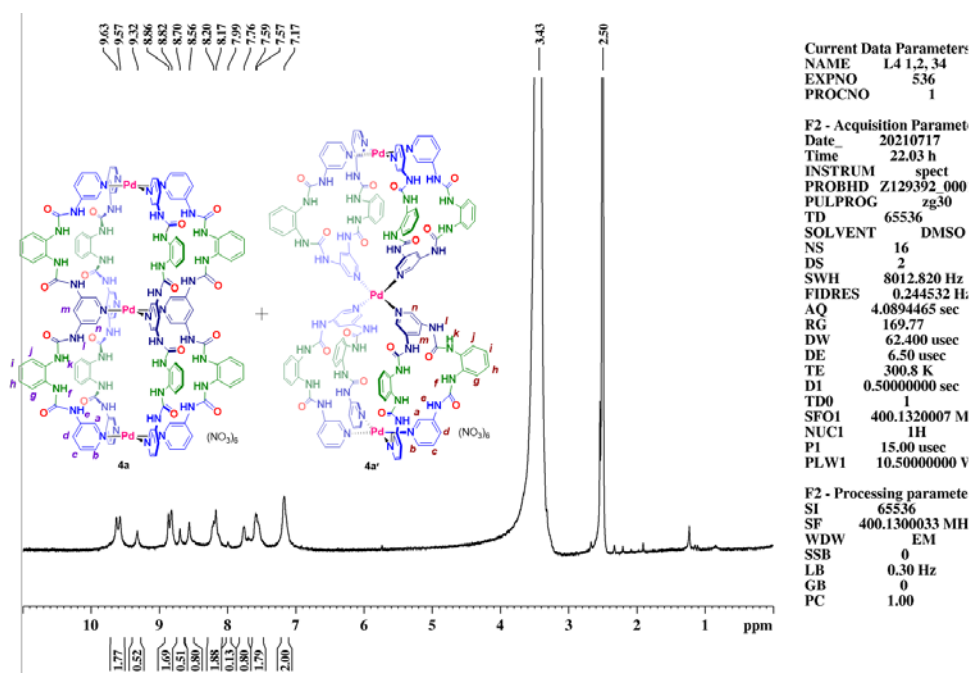

Current Data Parameters  
NAME L4 1.2.34  
EXPNO 536  
PROCNO 1

F2 - Acquisition Parameters  
Date\_ 20210717  
Time 22.03 h  
INSTRUM spect  
PROBHD Z129392\_000  
PULPROG zg30  
TD 65536  
SOLVENT DMSO  
NS 16  
DS 2  
SWH 8012.820 Hz  
FIDRES 0.244532 Hz  
AQ 4.0894465 sec  
RG 169.77  
DW 62.400 usec  
DE 6.50 usec  
TE 300.8 K  
D1 0.50000000 sec  
TD0 1  
SFO1 400.1320007 M  
NUC1 1H  
P1 15.00 usec  
PLW1 10.50000000 V

F2 - Processing parameters  
SI 65536  
SF 400.1300033 MHz  
WDW EM  
SSB 0  
LB 0.30 Hz  
GB 0  
PC 1.00

**Fig. S56** 400 MHz  $^1\text{H}$  NMR expansion spectrum of cages **4a** and **4a'** in  $\text{DMSO-}d_6$ . (Colours: dark red = hour-glass shaped and purple = double-decker type  $\text{Pd}_3\text{L}_4$  cages)

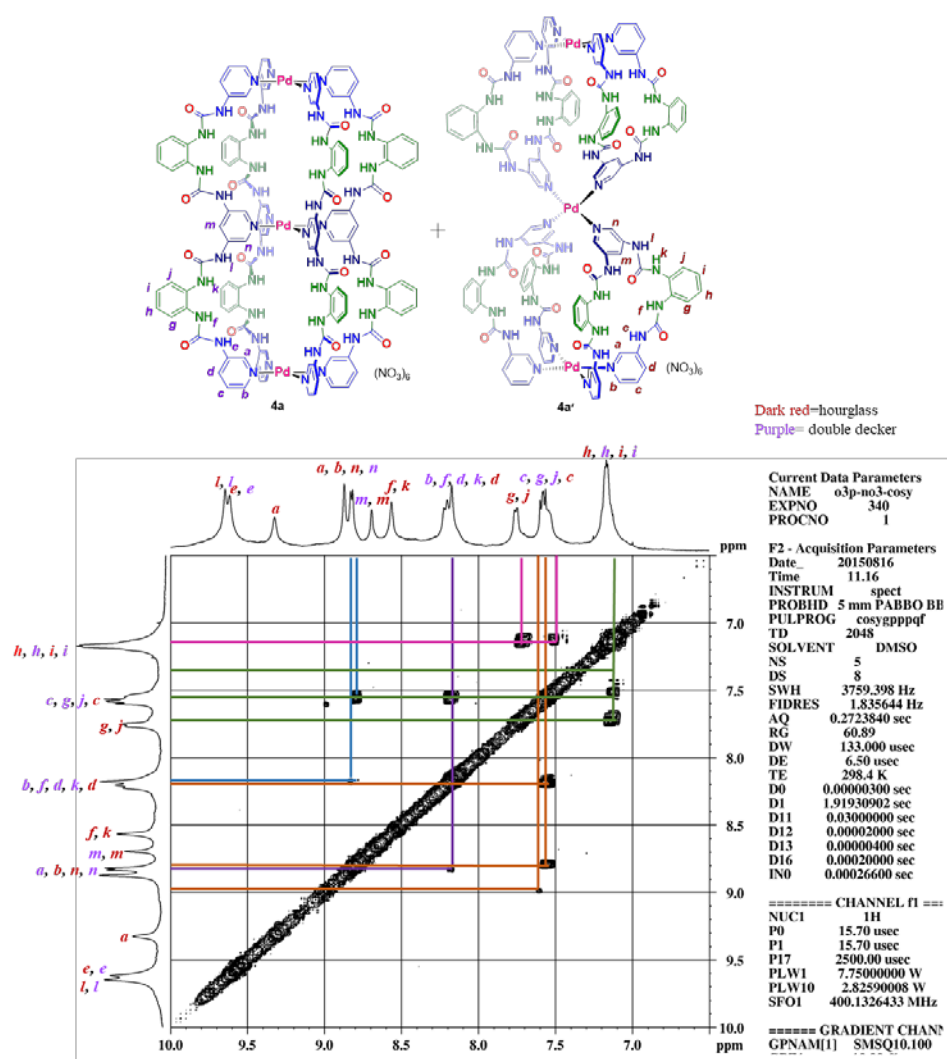

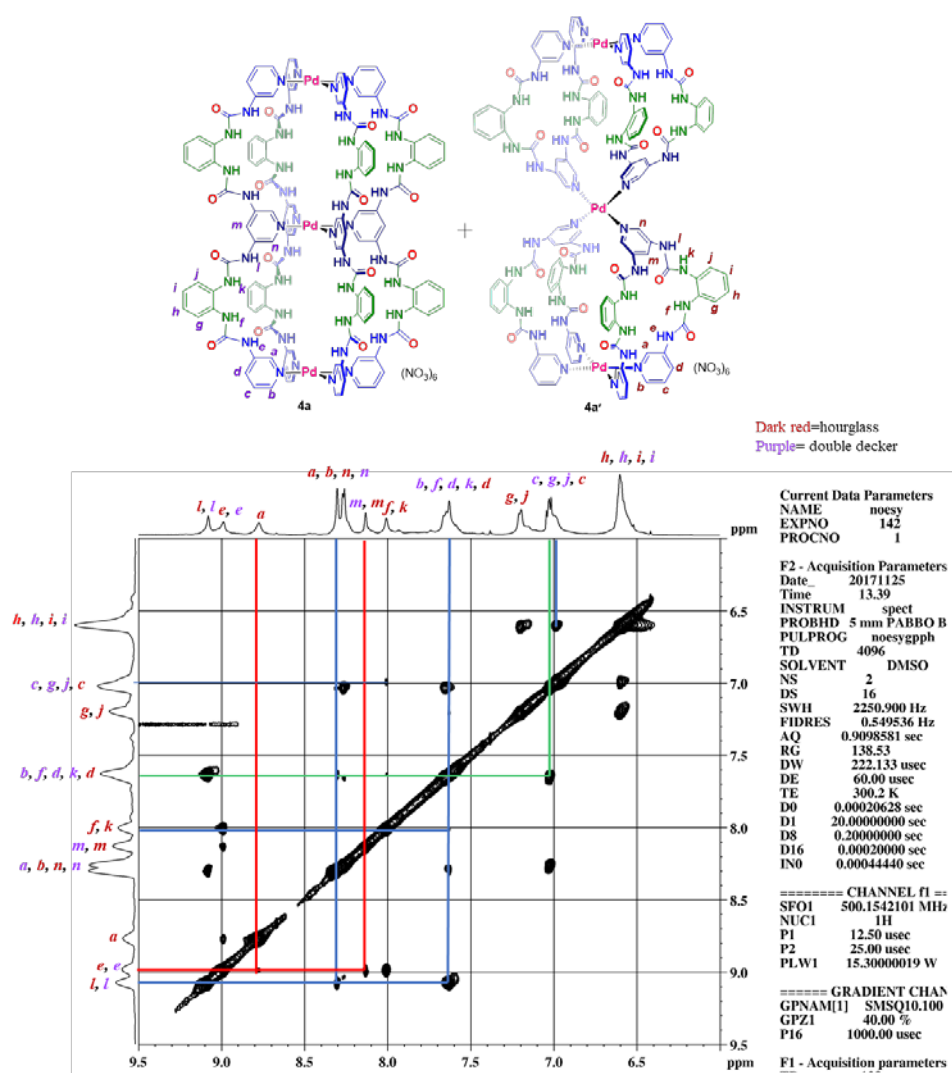

**Fig. S58** 500 MHz NOESY expansion spectrum of cages **4a** and **4a'** in DMSO-*d*<sub>6</sub>.

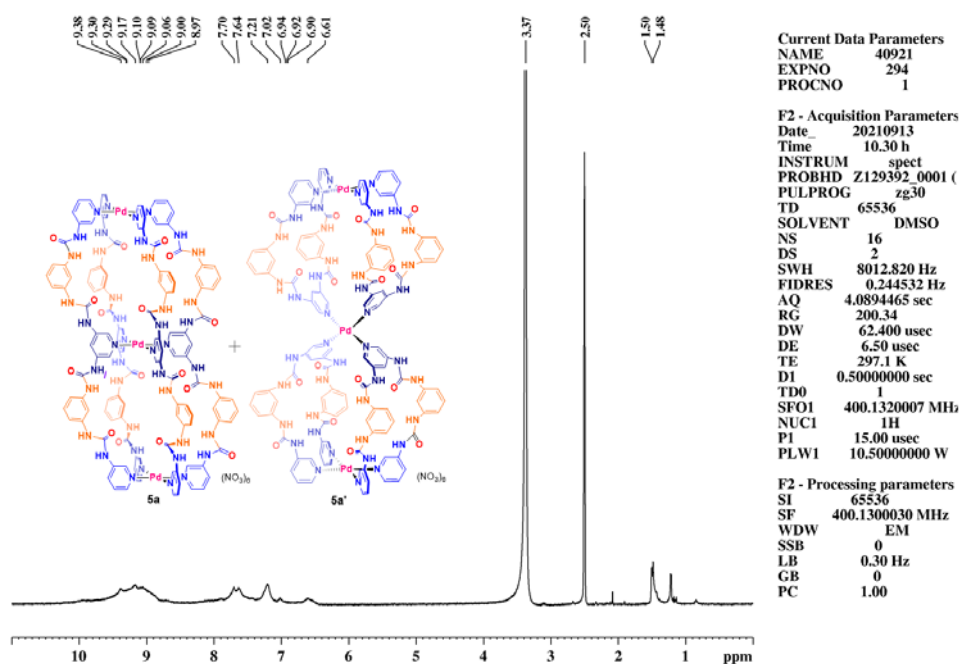

**Fig. S59** 400 MHz  $^1\text{H}$  NMR spectrum of cages **5a** and **5a'** in  $\text{DMSO-}d_6$ , recorded at rt.

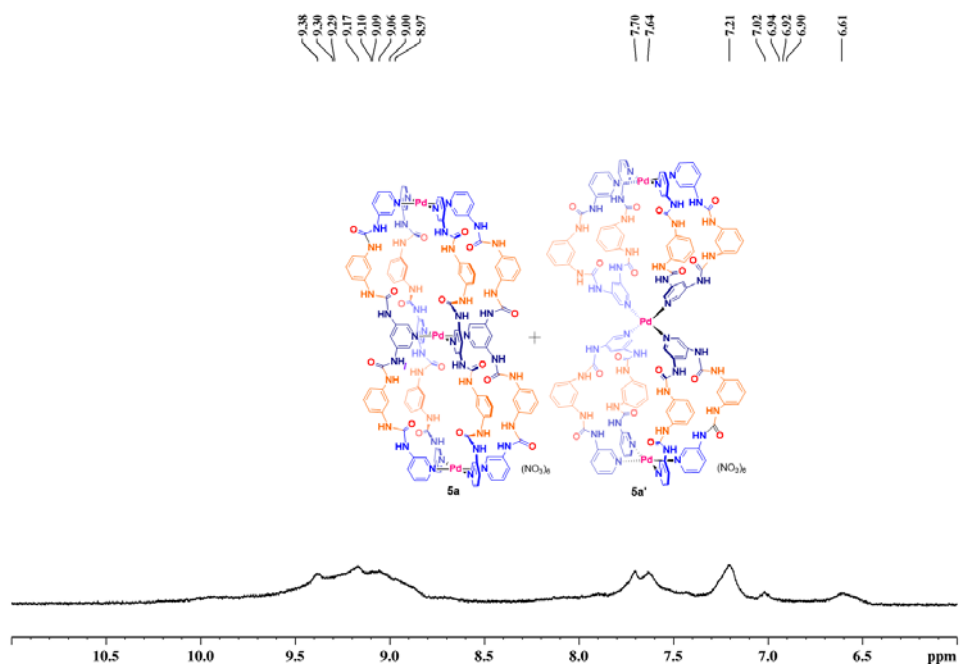

**Fig. S60** 400 MHz  $^1\text{H}$  NMR expansion spectrum of cages **5a** and **5a'** in  $\text{DMSO-}d_6$ , recorded at rt.

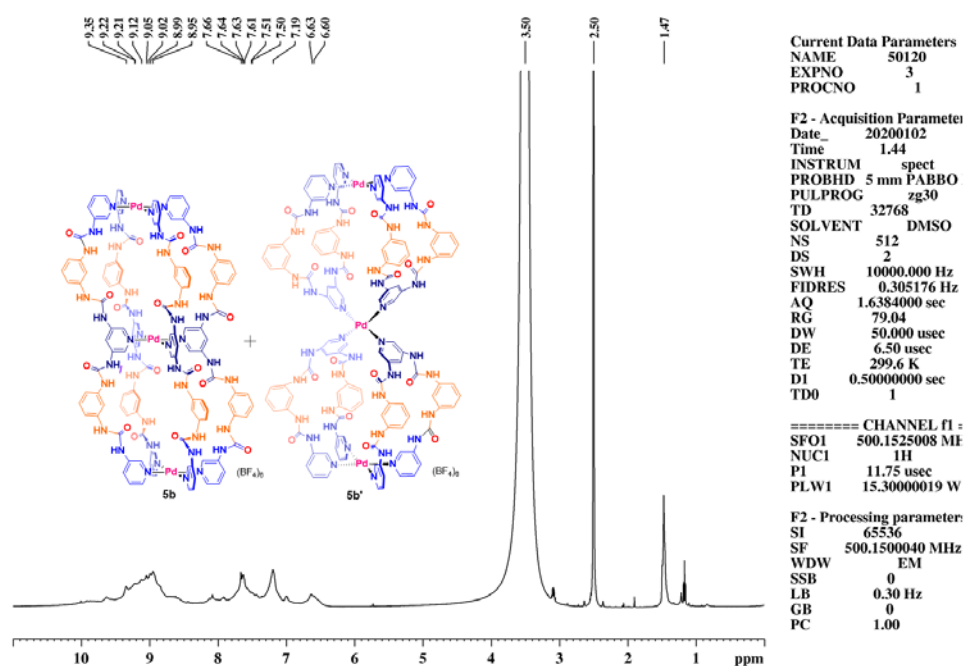

**Fig. S61** 500 MHz  $^1\text{H}$  NMR spectrum of cages **5b** and **5b'** in  $\text{DMSO-}d_6$ , recorded at rt.

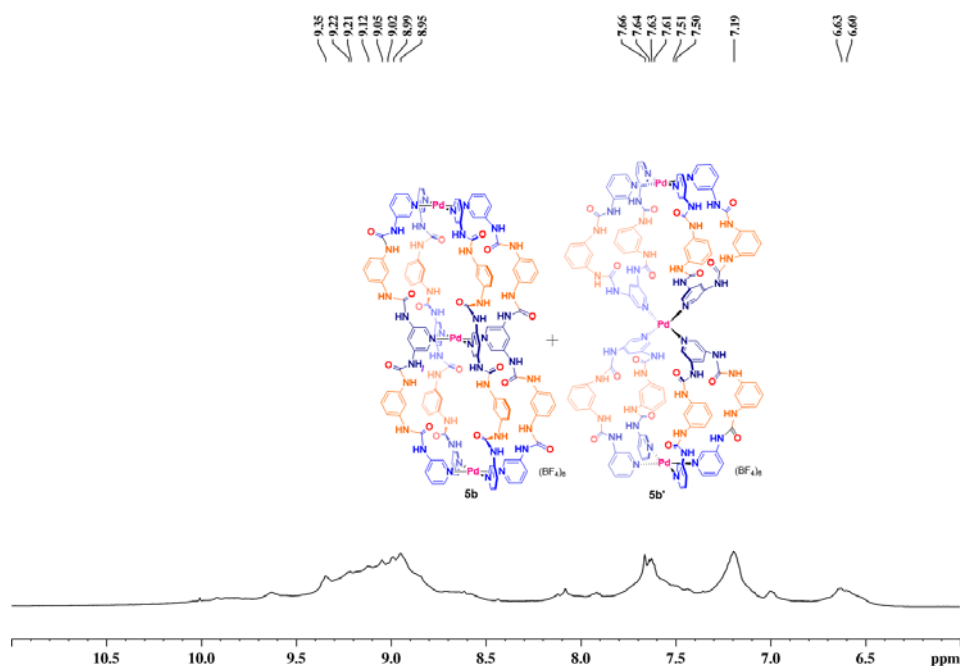

**Fig. S62** 500 MHz  $^1\text{H}$  NMR expansion spectrum of cages **5b** and **5b'** in  $\text{DMSO-}d_6$ , recorded at rt.

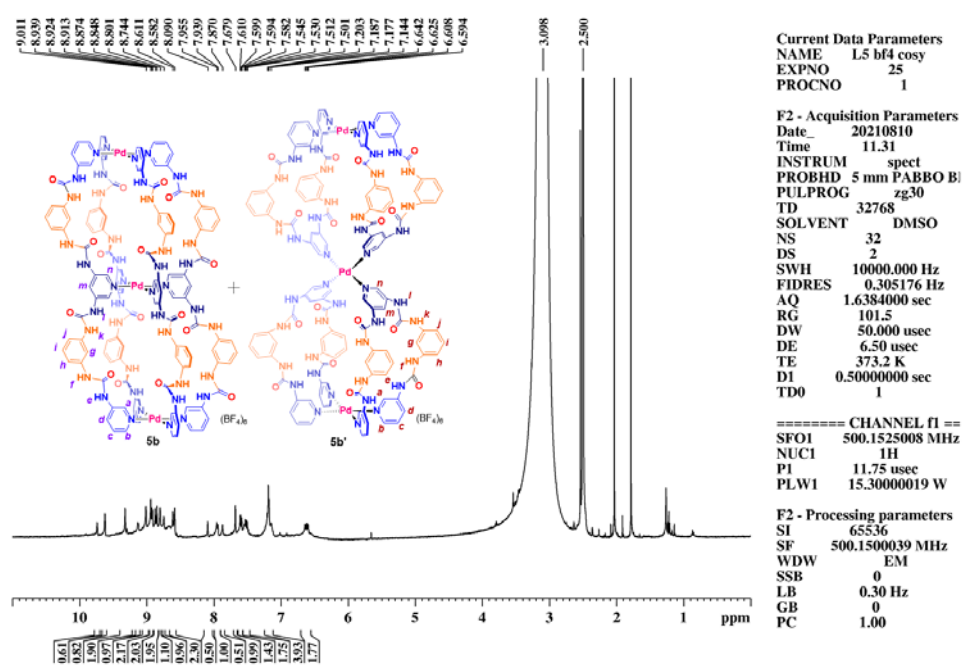

**Fig. S63** 500 MHz  $^1\text{H}$  NMR spectrum of cages **5b** and **5b'** in  $\text{DMSO}-d_6$ , recorded at  $100^\circ\text{C}$ .

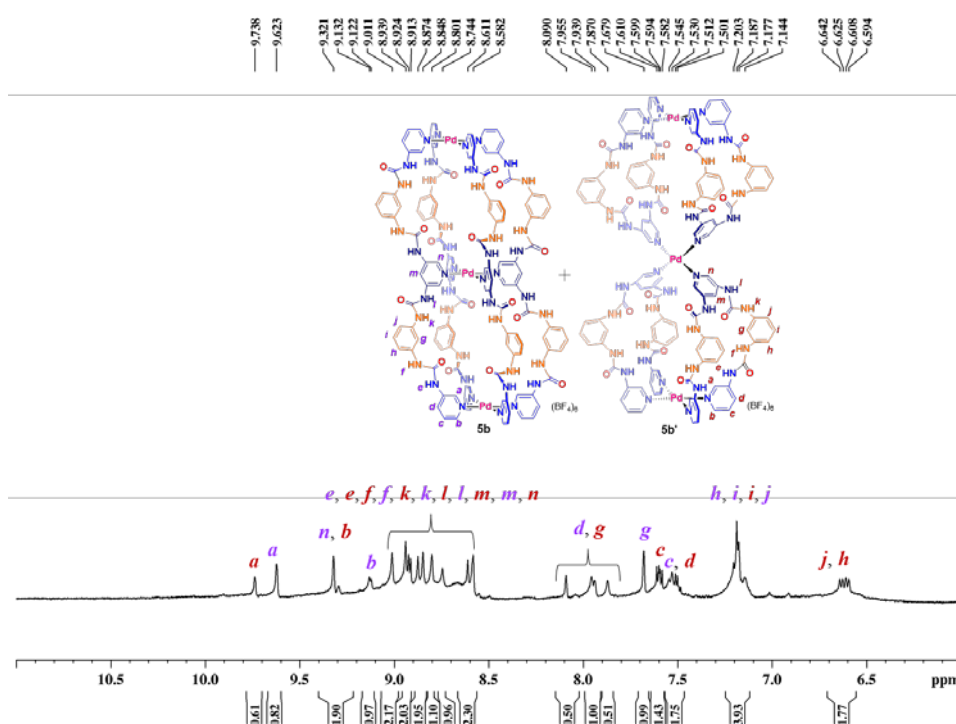

**Fig. S64** 500 MHz  $^1\text{H}$  NMR expansion spectrum of cages **5b** and **5b'** in  $\text{DMSO}-d_6$ , recorded at  $100^\circ\text{C}$ . (Colours: dark red = hour-glass shaped and purple = double-decker type  $\text{Pd}_3\text{L}_4$  cages)

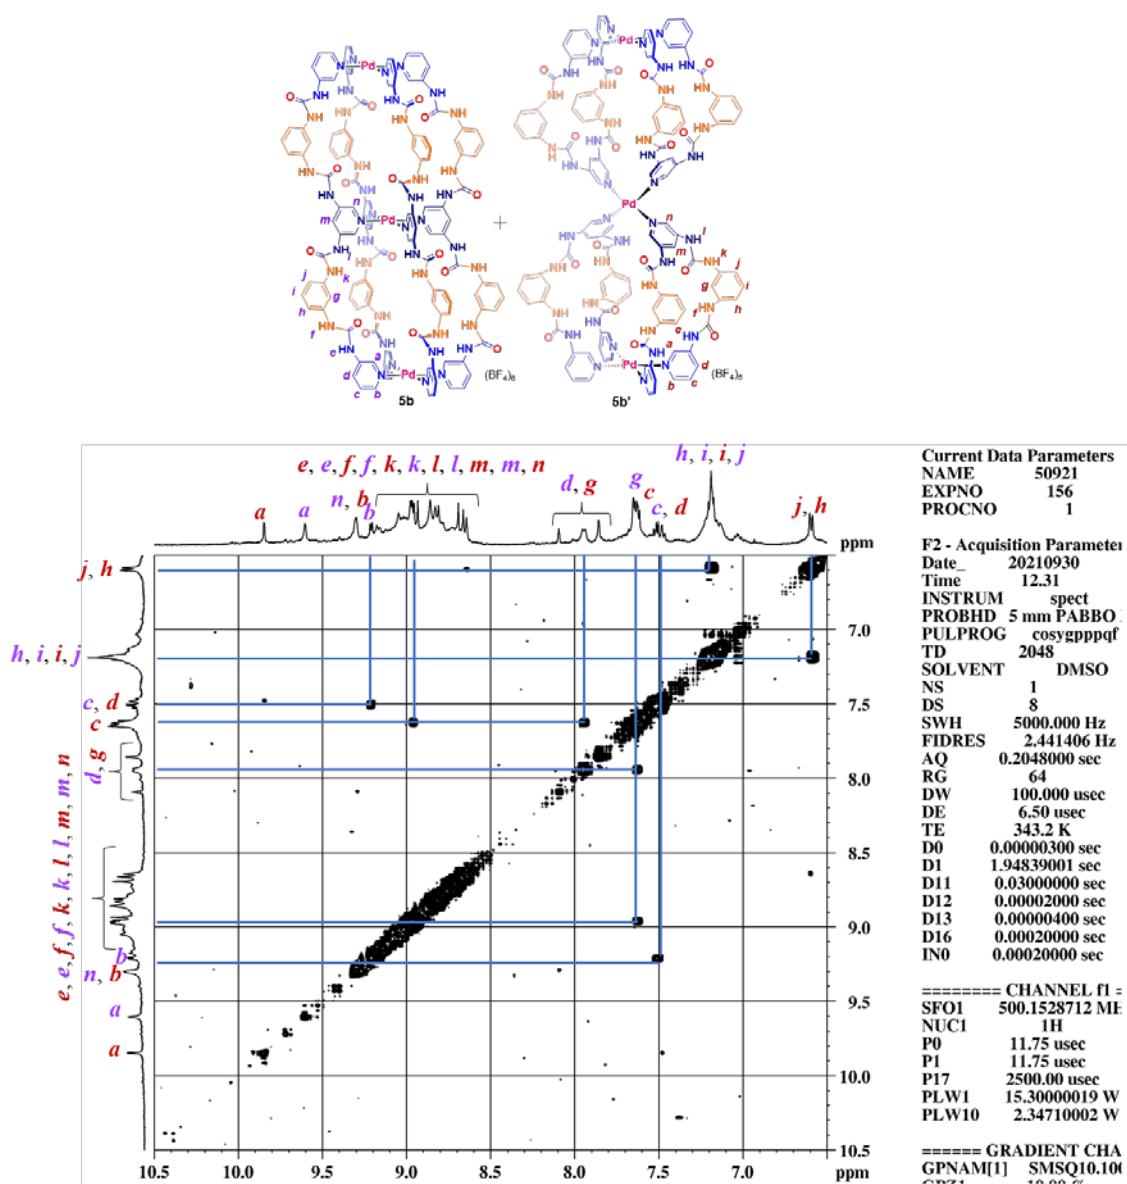

**Fig. S65** 500 MHz H-H COSY expansion spectrum of cages **5b** and **5b'** in DMSO-*d*<sub>6</sub>, recorded at 70 °C.



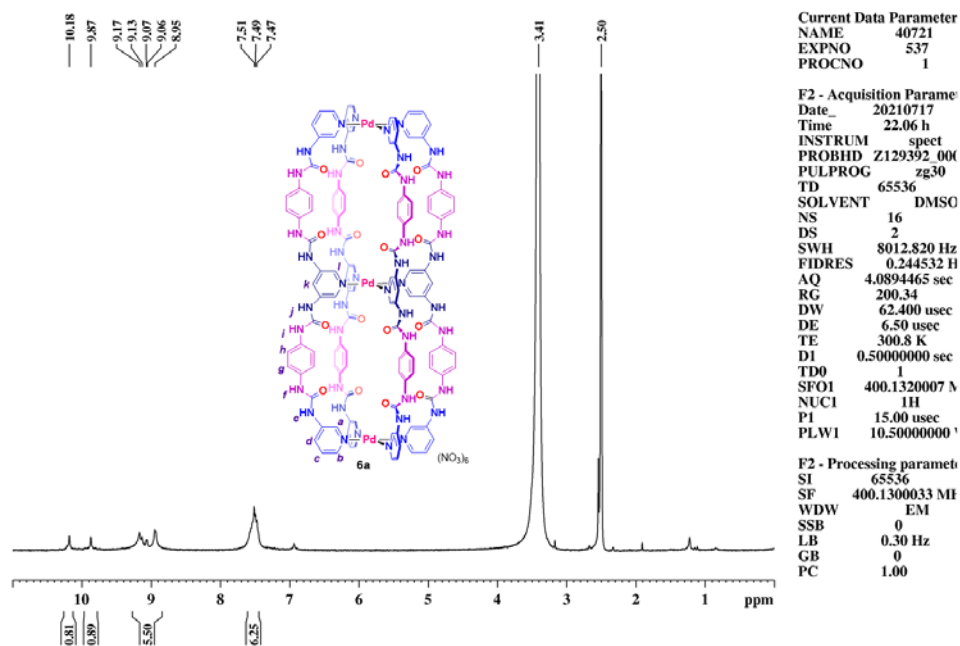

**Fig. S66** 400 MHz  $^1\text{H}$  NMR spectrum of cage **6a** in  $\text{DMSO-}d_6$ .

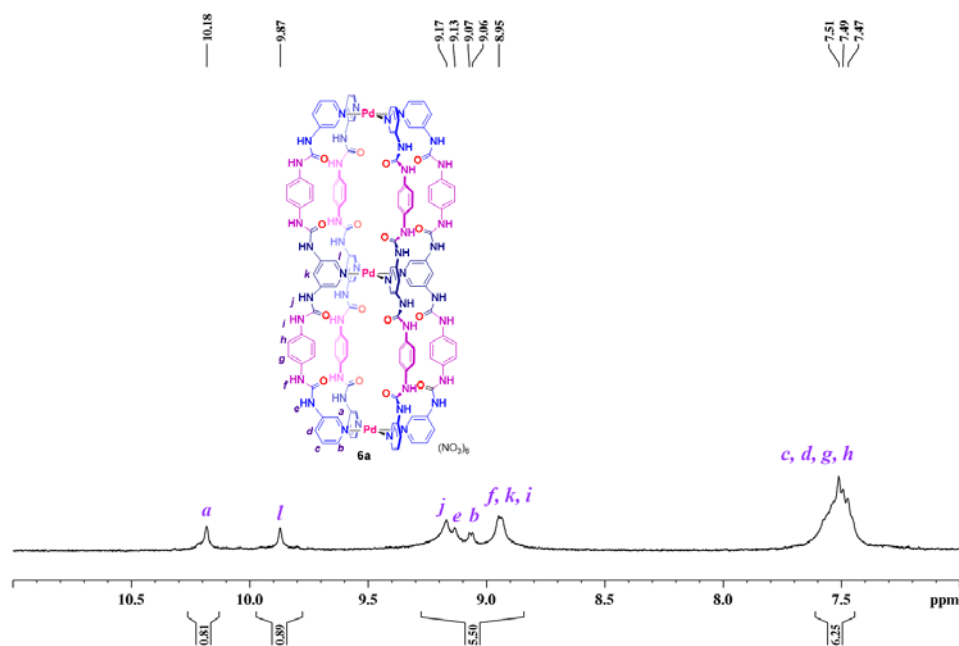

**Fig. S67** 400 MHz  $^1\text{H}$  NMR expansion spectrum of cage **6a** in  $\text{DMSO-}d_6$ .

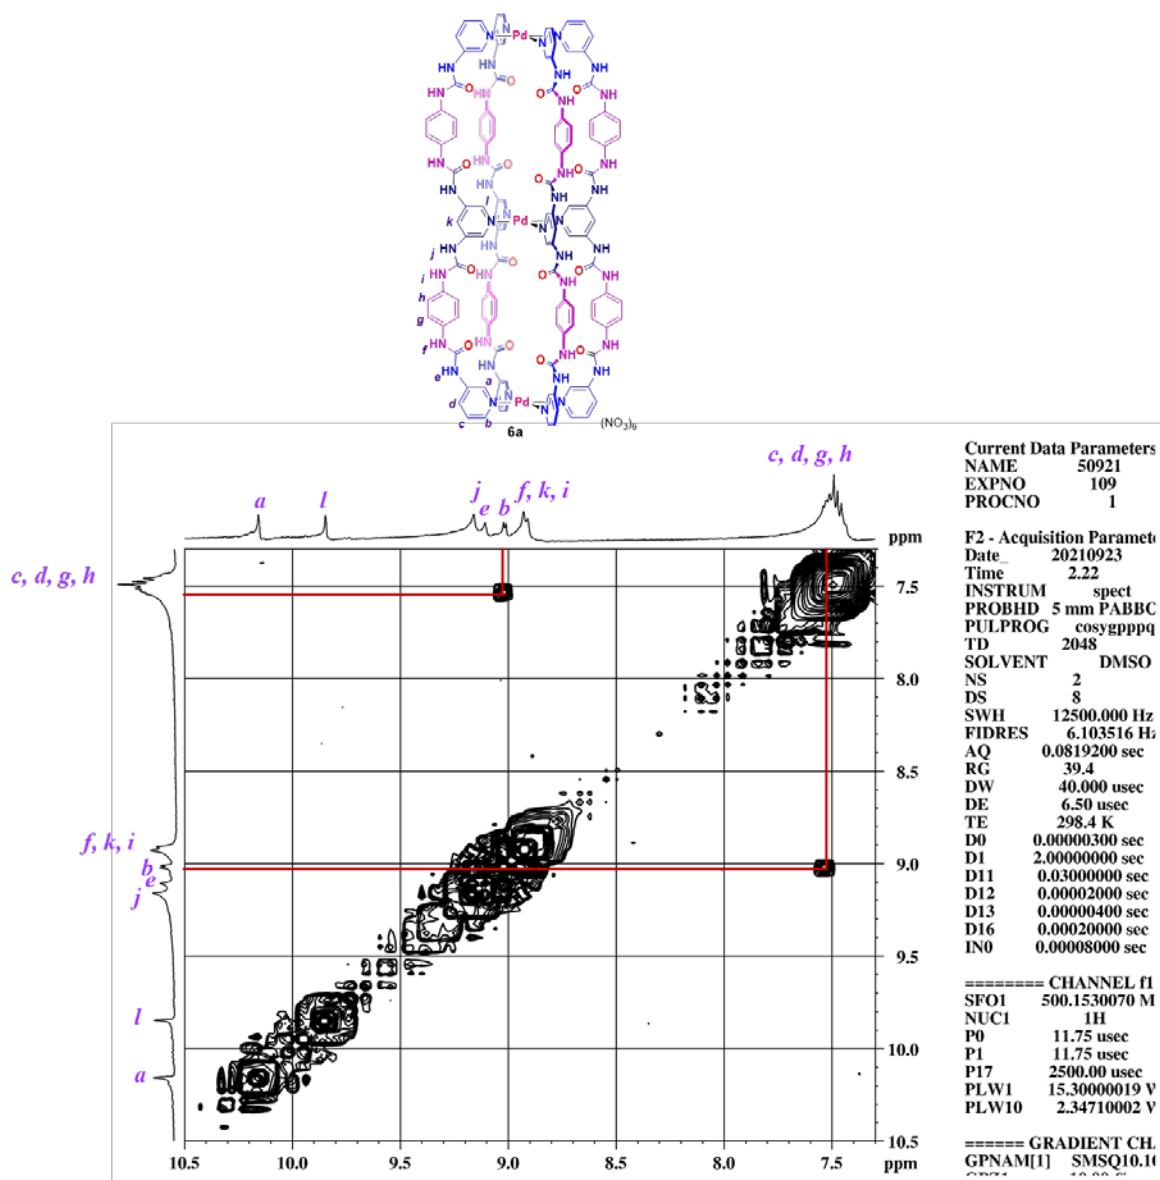

**Fig. S68** 500 MHz H-H COSY expansion spectrum of cage **6a** in DMSO-*d*<sub>6</sub>.

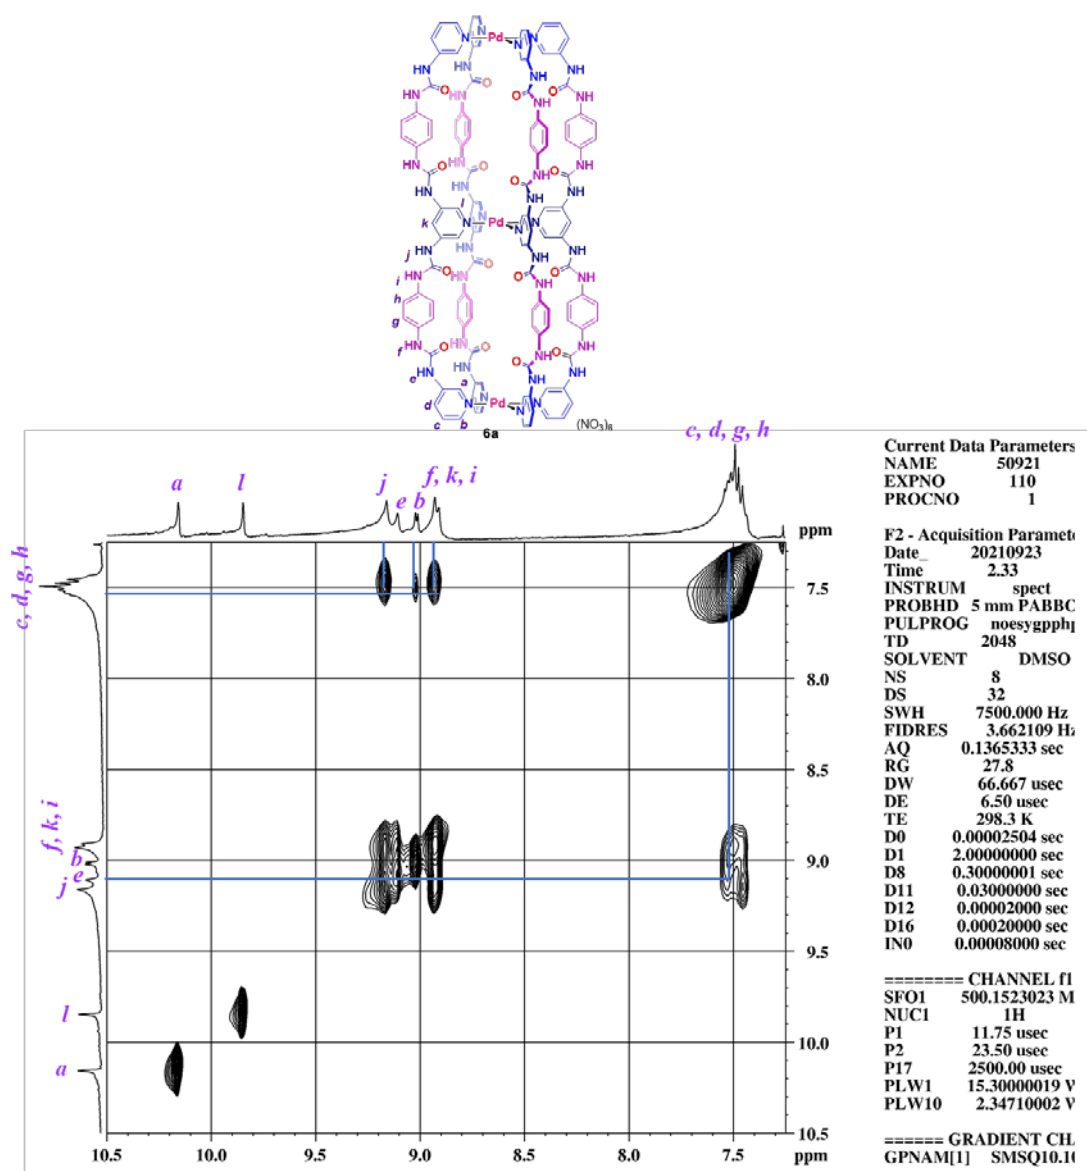

**Fig. S69** 500 MHz NOESY expansion spectrum of cage **6a** in DMSO-*d*<sub>6</sub>.

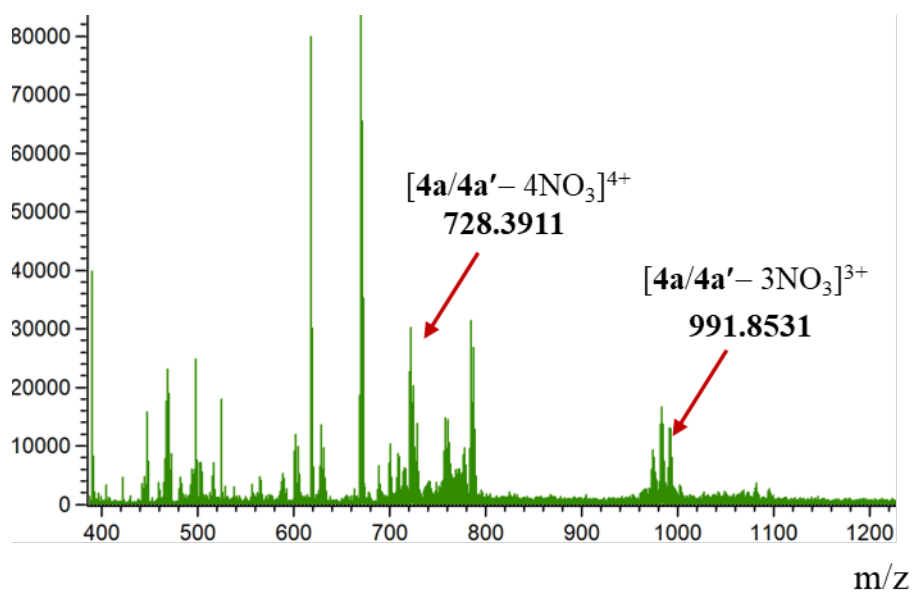

**Fig. S70** ESI-MS spectrum of trinuclear cages  $[Pd_3(L4)_4](NO_3)_6$ , **4a** and **4a'**.

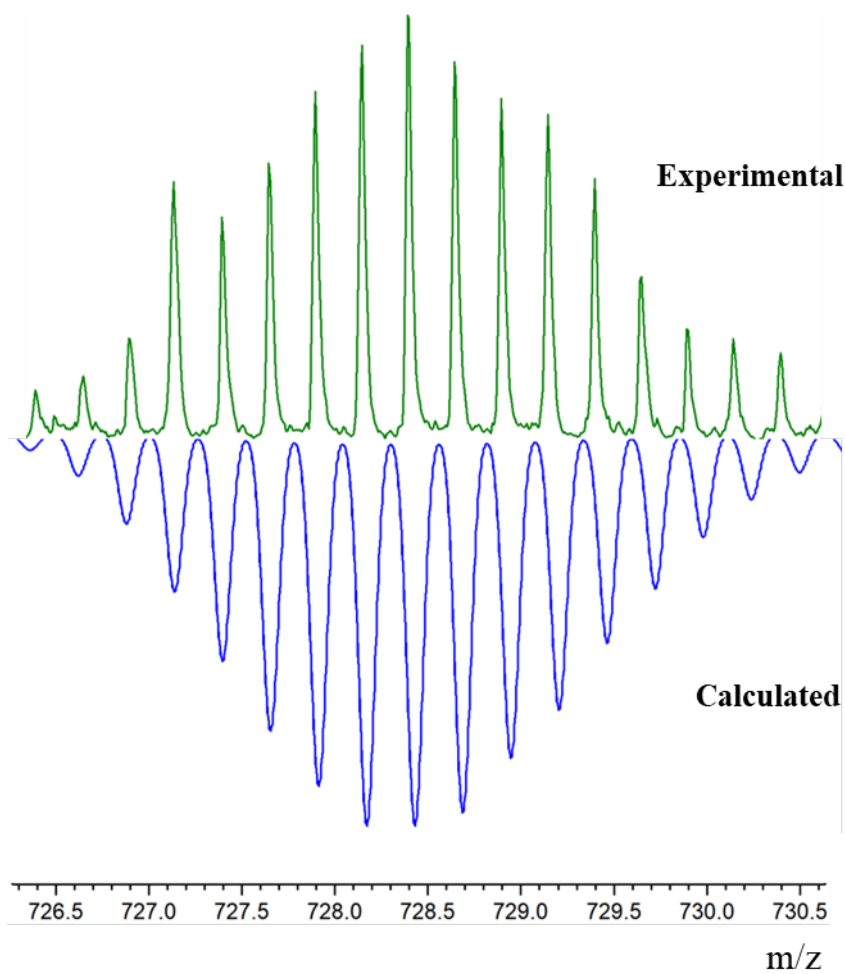

**Fig. S71** Isotopic pattern of the trinuclear cage  $[4\mathbf{a}/4\mathbf{a}'\text{-}4\text{NO}_3]^{4+}$  (top) and calculated pattern (bottom).

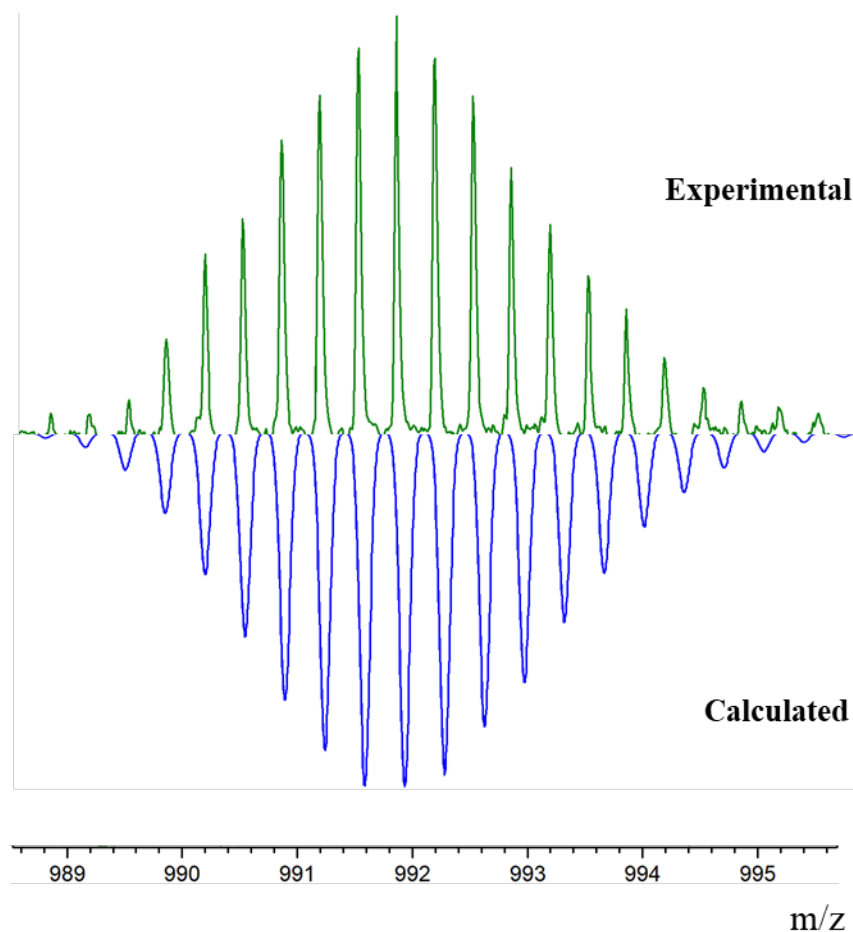

**Fig. S72** Isotopic pattern of the trinuclear cage  $[4a/4a'-3NO_3]^{3+}$  (top) and calculated pattern (bottom).

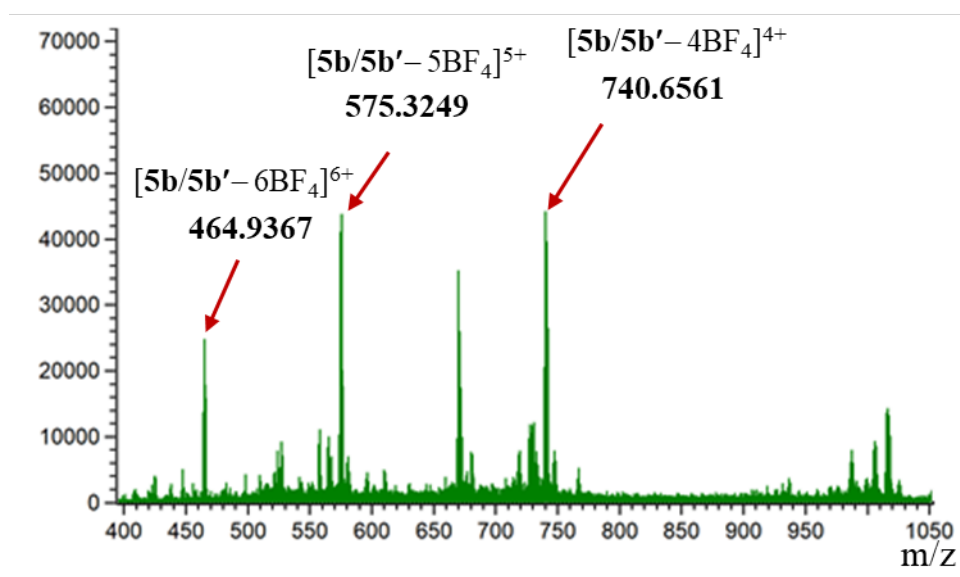

**Fig. S73** ESI-MS spectrum of trinuclear cages  $[Pd_3(L5)_4](BF_4)_6$ , **5b** and **5b'**.

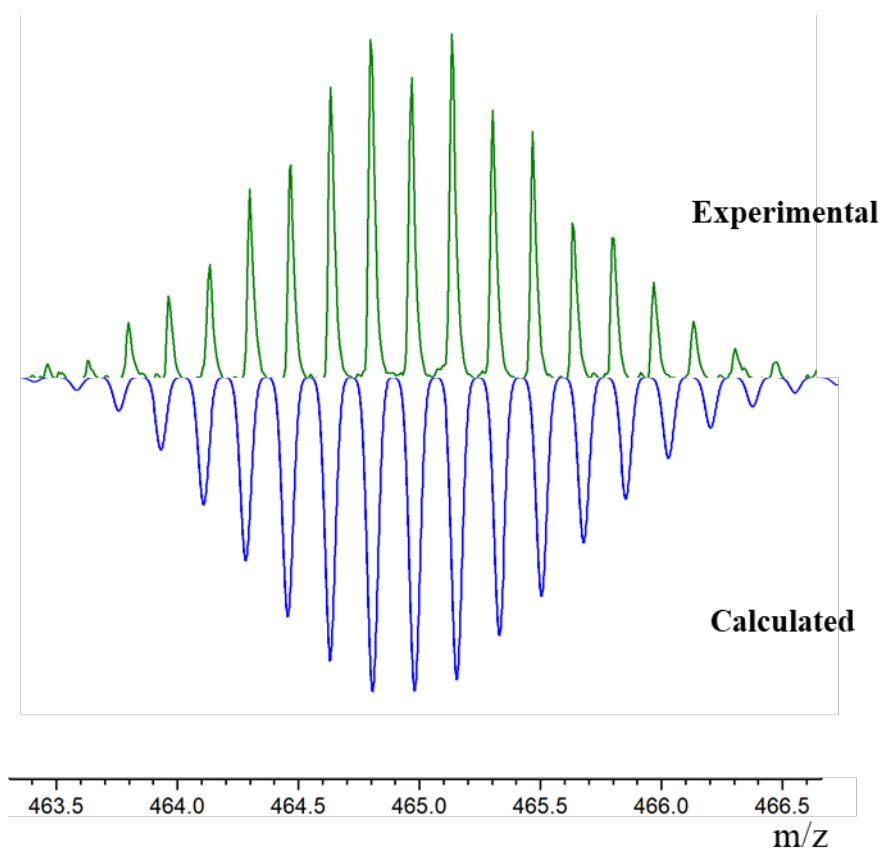

**Fig. S74** Isotopic pattern of the trinuclear cage  $[5b/5b'-6BF_4]^{6+}$  (top) and calculated pattern (bottom).

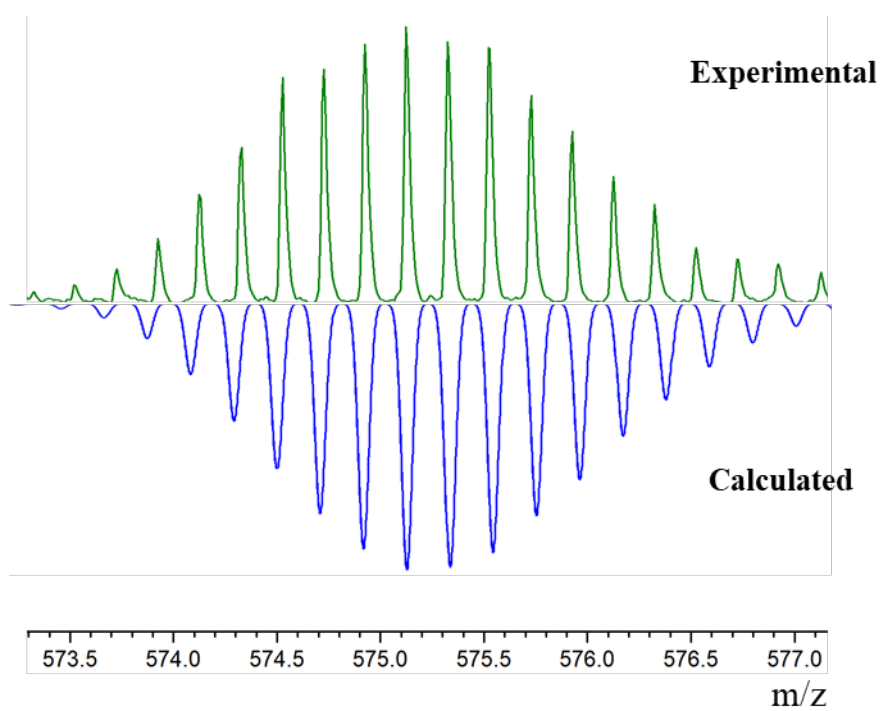

**Fig. S75** Isotopic pattern of the trinuclear cage  $[5b/5b'-5BF_4]^{5+}$  (top) and calculated pattern (bottom).



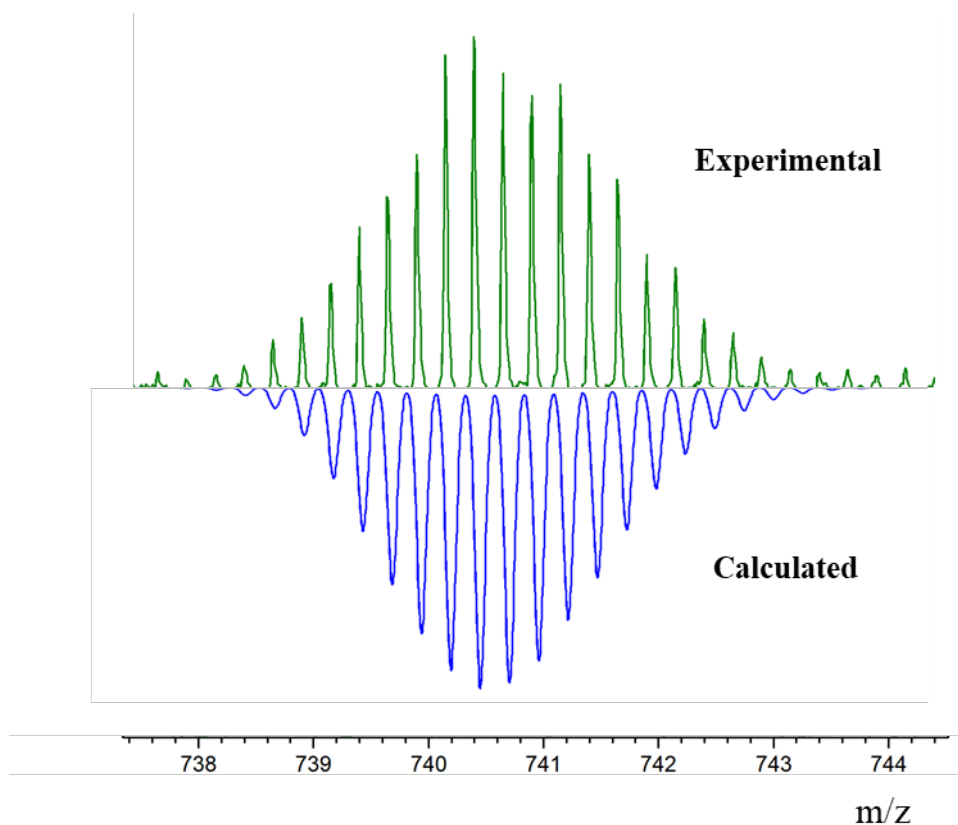

**Fig. S76** Isotopic pattern of the trinuclear cage  $[5b/5b'-4BF_4]^{4+}$  (top) and calculated pattern (bottom).

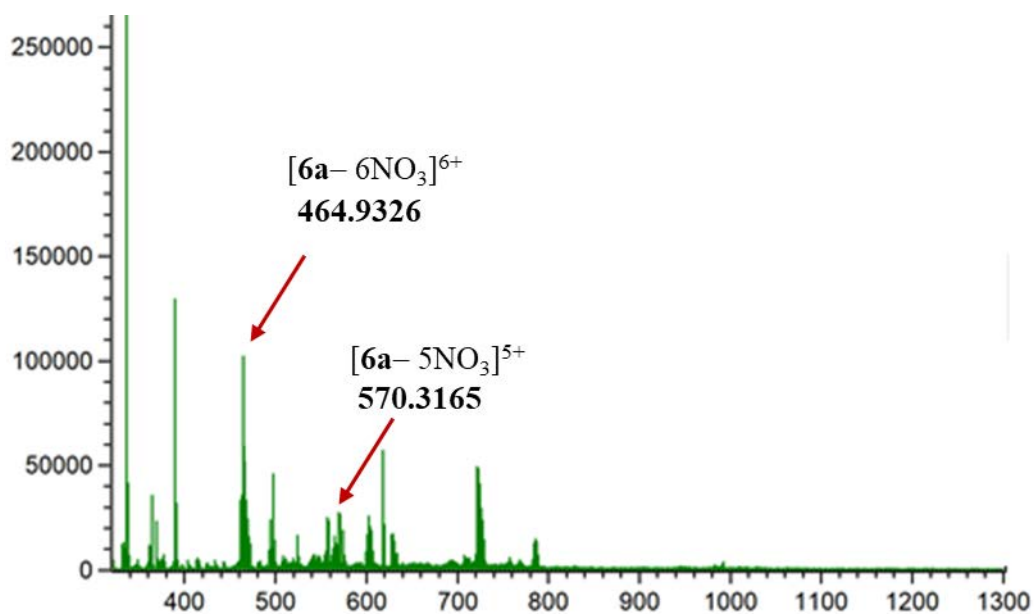

**Fig. S77** ESI-MS spectrum of trinuclear cage  $[Pd_3(L6)_4](NO_3)_6$ , **6a**.

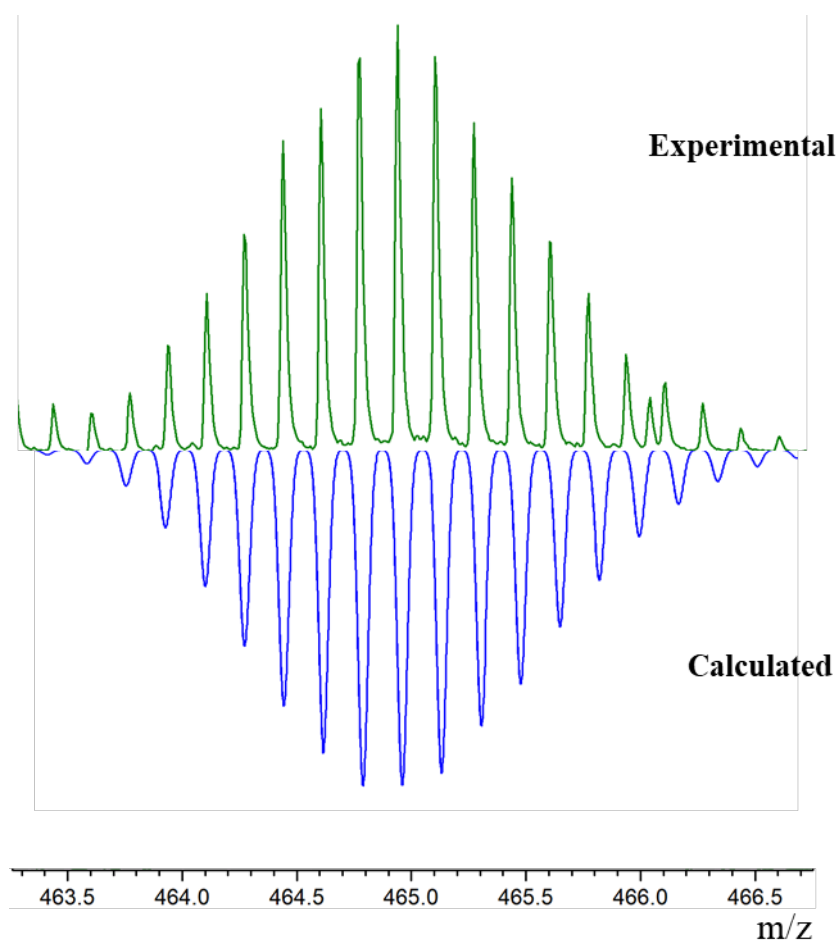

**Fig. S78** Isotopic pattern of the trinuclear cage  $[6a-6NO_3]^{6+}$  (top) and calculated pattern (bottom).

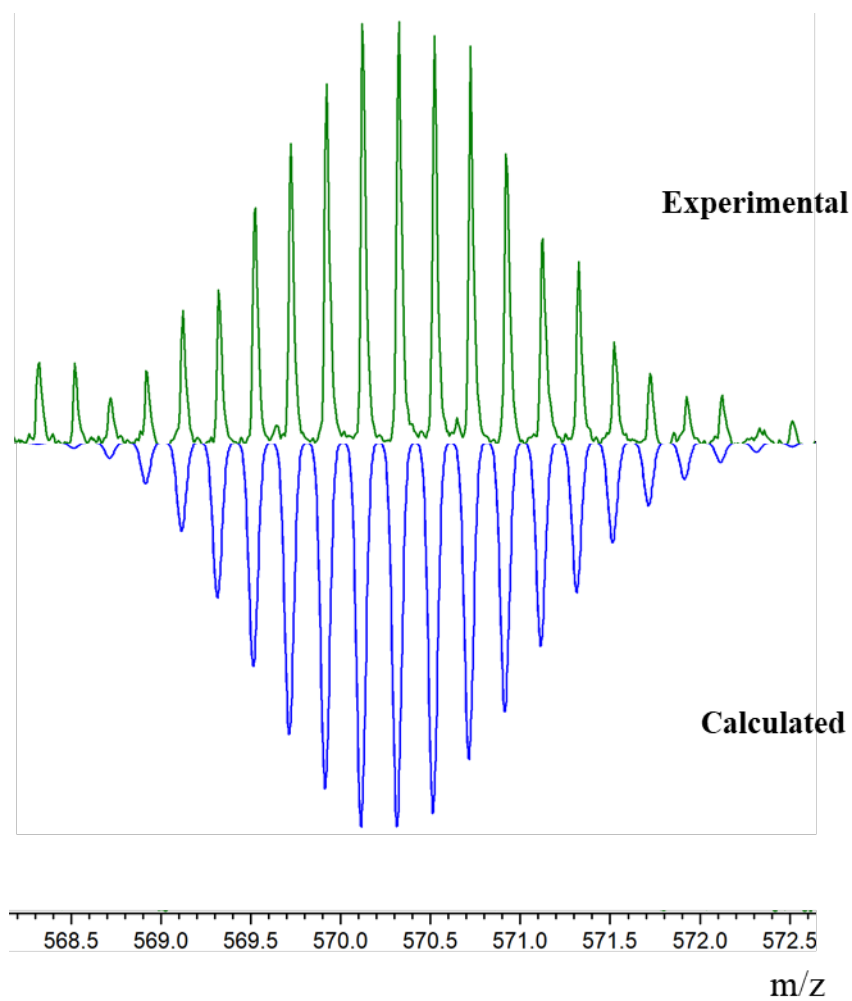

**Fig. S79** Isotopic pattern of the trinuclear cage  $[6a-5NO_3]^{5+}$  (top) and calculated pattern (bottom).

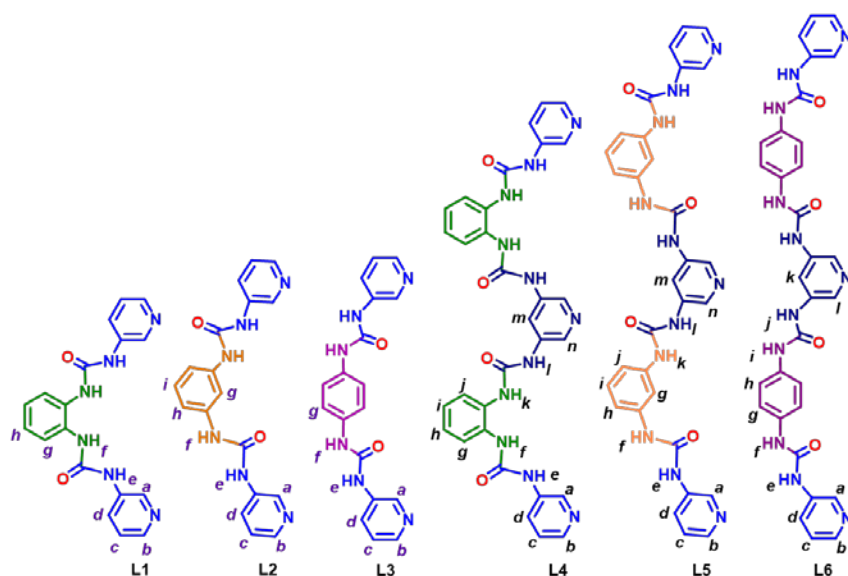

**Fig. S80** Nonchelating regioisomeric bi-<sup>5</sup> and tridentate ligands **L1**, **L2**, **L3**, **L4**, **L5**, and **L6**.

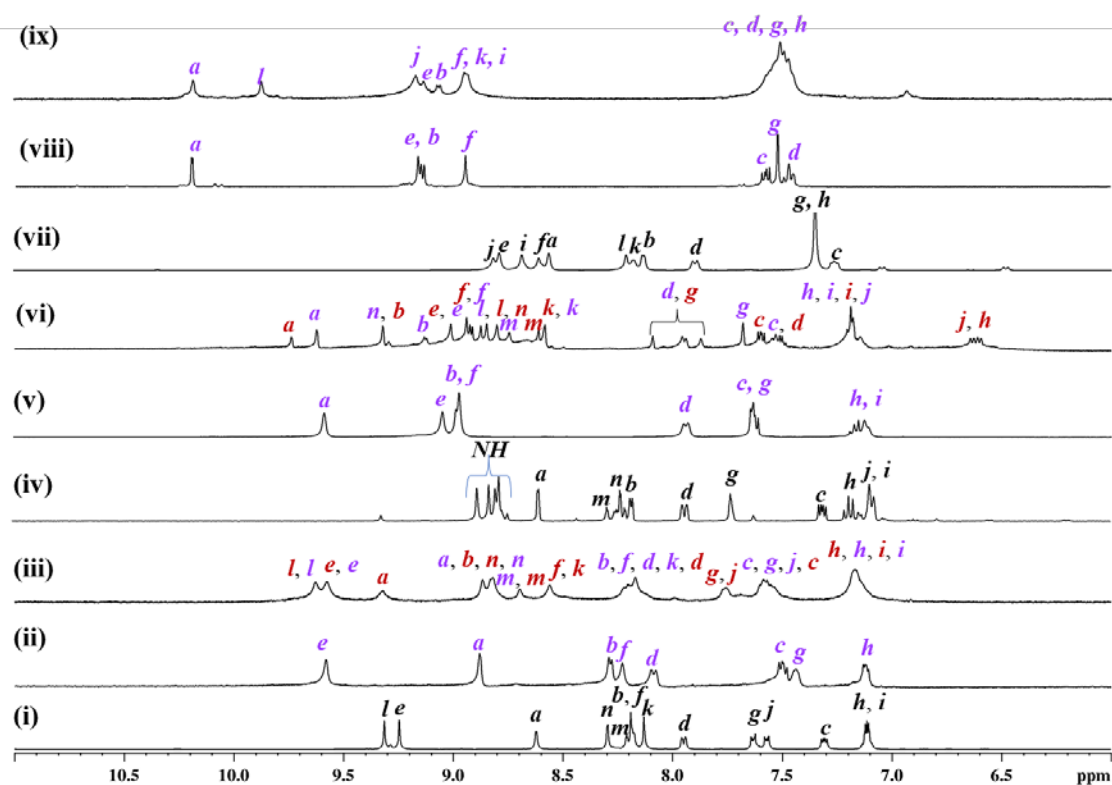

**Fig. S81** 500 MHz <sup>1</sup>H NMR expansion spectra of (i) ligand **L4**; (ii) cage [Pd<sub>2</sub>(**L1**)<sub>4</sub>](NO<sub>3</sub>)<sub>4</sub>, **1**; (iii) cages ([Pd<sub>3</sub>(**L4**)<sub>4</sub>](NO<sub>3</sub>)<sub>6</sub>) **4a** and **4a'**; (iv) ligand **L5**; (v) cage [Pd<sub>2</sub>(**L2**)<sub>4</sub>](NO<sub>3</sub>)<sub>4</sub>, **2**; (vi) cages ([Pd<sub>3</sub>(**L5**)<sub>4</sub>](BF<sub>4</sub>)<sub>6</sub>) **5b** and **5b'**; (vii) ligand **L6**; (viii) cage [Pd<sub>2</sub>(**L3**)<sub>4</sub>](NO<sub>3</sub>)<sub>4</sub>, **3**; (ix) cage ([Pd<sub>3</sub>(**L4**)<sub>4</sub>](NO<sub>3</sub>)<sub>6</sub>) **6a** in DMSO-*d*<sub>6</sub>. (Colours: dark red = hour-glass shaped and purple = double-decker type Pd<sub>3</sub>L<sub>4</sub> cages)

#### 4. Theoretical calculations

The preferential formation of an hourglass shaped trinuclear  $\text{Pd}_3\text{L}_4$  cage in gaseous state was further supported by the DFT calculations using Gaussian 16 software package.<sup>6</sup> The B3LYP (Becke's three parameter hybrid functional using the LYP correlation)<sup>7</sup> functional was used for geometry optimizations and frequencies with LANL2DZ for palladium, and the 6-31G\* basis set for carbon, nitrogen, oxygen, and hydrogen. Frequency calculations were performed for the optimized structures to confirm the absence of any imaginary frequencies

**DFT calculations of trinuclear  $\text{Pd}_3\text{L}_4$  type cages.** To further understand the role of ligand design on the formation of an "hour-glass" shaped unique trinuclear  $\text{Pd}_3\text{L}_4$  type assembly, density functional theory (DFT) calculations in gaseous state were employed to calculate the energy of possible diastereomers of  $\text{Pd}_3\text{L}_4$  cages (Fig. S83). For cages **4a** and **4a'**, the energy difference between the energy-minimized structures of the cationic fragments of the "double-decker" type and "hour-glass" shaped unusual  $\text{Pd}_3\text{L}_4$  cages is 96.98 kcal/mol and the unusual trinuclear cage was found to be energetically more favourable. Particularly, this moderate energy difference favours the formation of an "hour-glass" shaped self-assembly in solid state with high purity whereas in solution state both the  $\text{Pd}_3\text{L}_4$  type cages remain in equal ratio. The DFT calculations for cages **5a/5b** and **5a'/5b'** showed that the "double-decker" type assembly was found to be energetically more favourable than the "hour-glass" shaped architecture with energy difference of  $\Delta E = 15.39$  kcal/mol, which was confirmed by the complicated  $^1\text{H}$  NMR spectrum. Because of very low energy difference between two diastereomers of cages **5a/5b** and **5a'/5b'**, we are not successful to obtain any exclusive  $\text{Pd}_3\text{L}_4$  architecture in solid state after several attempts. However, in case of cages **6a** and **6a'**, exclusively double-decker type  $\text{Pd}_3\text{L}_4$  cage was observed in both solution and solid state. The DFT calculations for cage **6a** supported

double decker architecture instead of “hour-glass” shaped assembly with energy difference of  $\Delta E = 75.28$  kcal/mol.

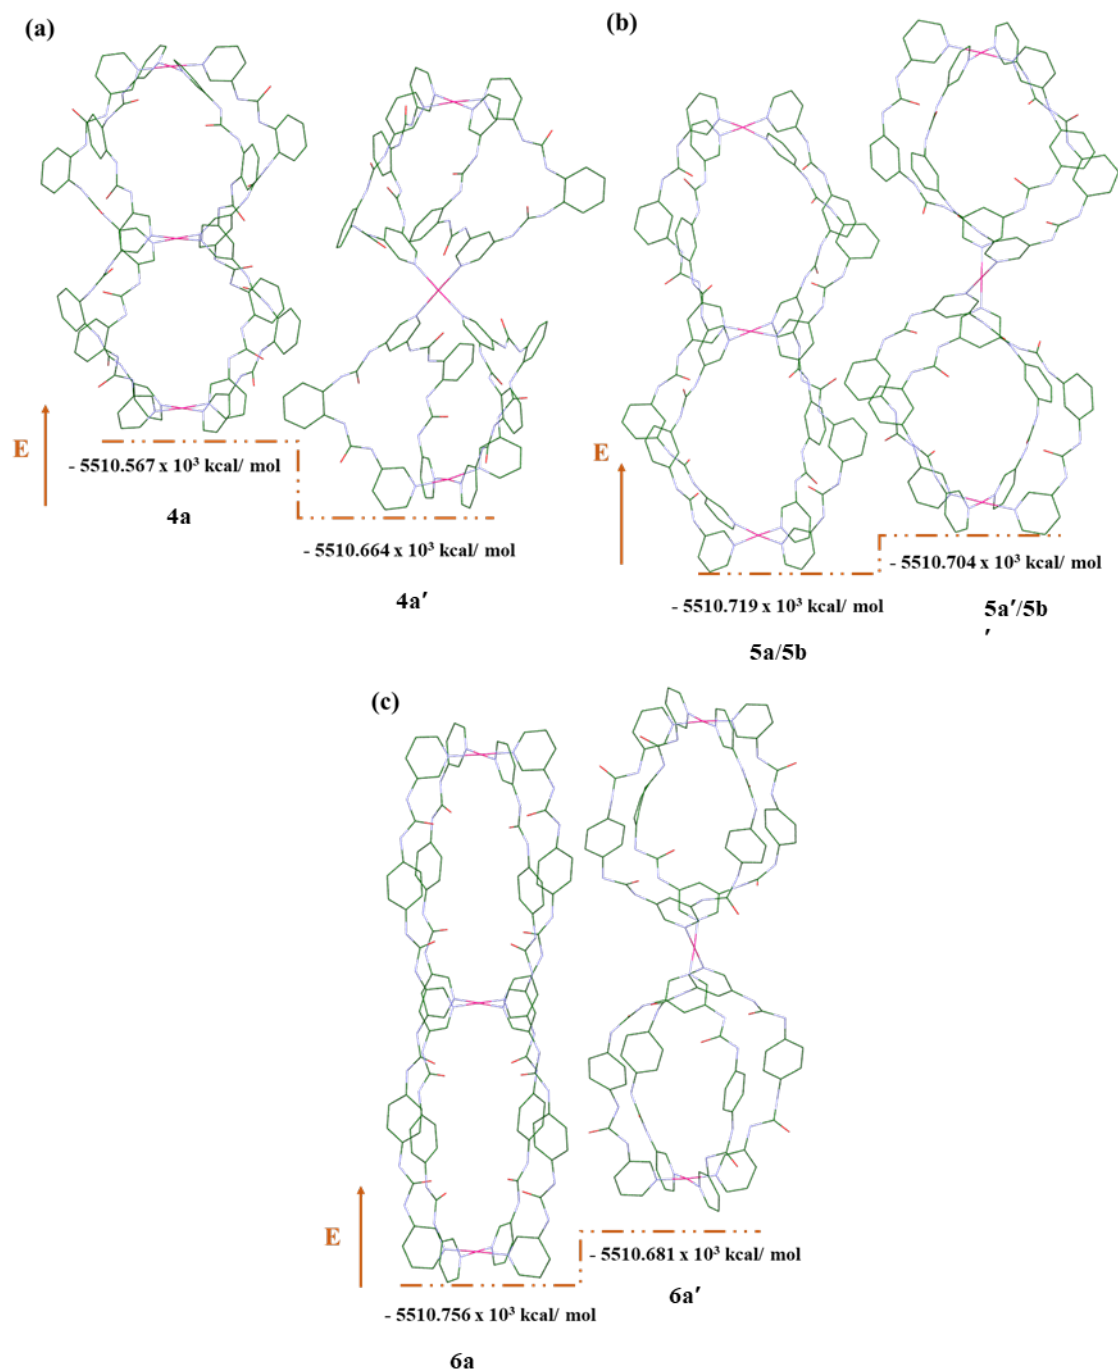

**Fig. S82** Calculated structures (B3LYP/6-31G\*) of the double decker type and unusual “hour-glass” shaped  $\text{Pd}_3\text{L}_4$  assemblies of cages (a) **4a** and **4a'**; (b) **5b** and **5b'**; and (c) **6a** and **6a'** with energies (Hydrogen atoms are omitted for clarity) (anions are not employed during calculations)

The coordination of “E”-shaped tridentate ligands with palladium (II) units in 2:1 and 4:3 molar ratios results a structural motif of  $\text{PdL}_2$  and  $\text{Pd}_3\text{L}_4$  type cages.<sup>8,9</sup> In mononuclear “spiro-type” type  $\text{PdL}_2$  macrocycles,<sup>8</sup> the coordination environment around the  $\text{PdN}_4$  square plane is satisfied by two ligand moieties. Each of the terminal pyridine of the individual ligand strand occupy cis-positions at  $\text{Pd(II)}$  centre to create a macrocyclic ring keeping the middle pyridine uncoordinated. Both the macrocyclic ligand loops are oriented in an alternate manner one pointing upward and another pointing downward with respect to the coordination square plane. If both the ligand loops converge toward same direction i.e “up-up” or “down-down” then there is a possibility to achieve the unusual “hour-glass” shaped configuration of trinuclear  $\text{Pd}_3\text{L}_4$ -type cage. The basic requirements to form coordination complexes with square planar geometry of  $\text{Pd(II)}$  unit are - (i) the Pd-N distances in complex are in the range of 2.01-2.03 Å and (ii) the cis-N-Pd-N bond angle should be close to 90°. However, the “spiro-type”  $\text{PdL}_2$  type assemblies so far known in literature are not suitable to satisfy the basic requirement for the formation of unusual “hour-glass” shaped trinuclear  $\text{Pd}_3\text{L}_4$ -type cage. The construction of the familiar “double-decker” type  $\text{Pd}_3\text{L}_4$  cage is feasible when all the coordination vectors of a “E”-shaped tridentate ligand are pointed unidirectionally, parallel to each other and remain on the same plane upon combination of ligand with  $\text{Pd(II)}$  units. On the contrary, an “hour-glass” shaped  $\text{Pd}_3\text{L}_4$  cage displays middle  $\text{PdN}_4$  plane perpendicular to terminal  $\text{PdN}_4$  planes where both the terminal pyridine moieties of an individual ligand strand converge to a same  $\text{Pd(II)}$  centre and the central pyridine group coordinates to another  $\text{Pd(II)}$  ion.

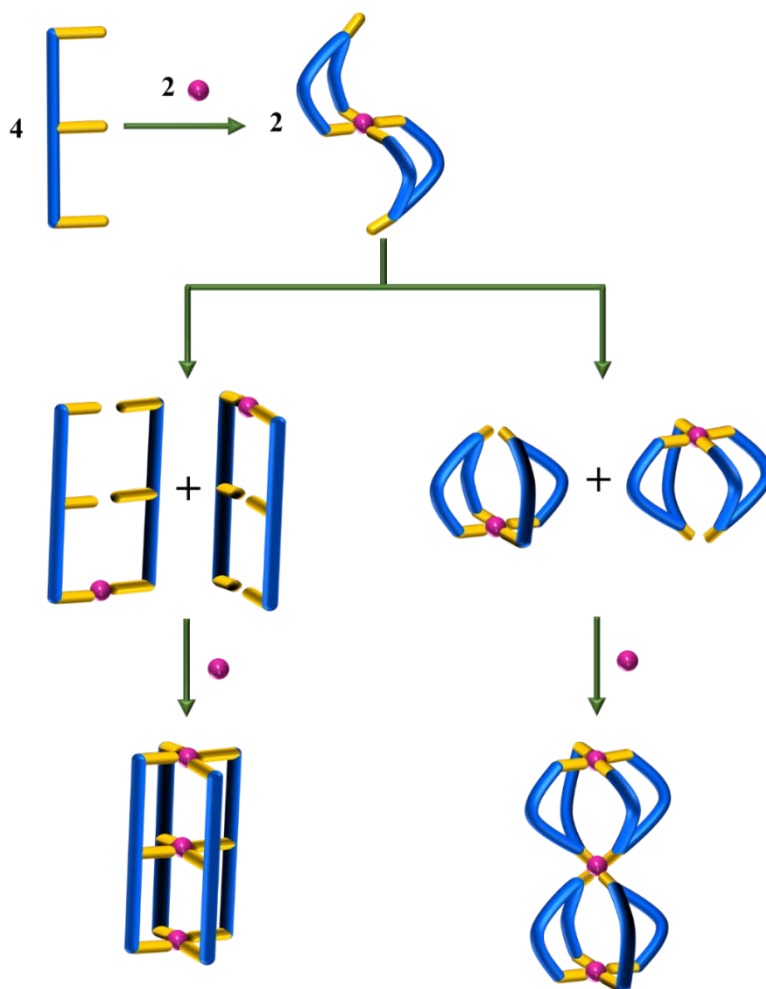

**Fig. S83** Schematic cartoon representation for the formation of mononuclear PdL<sub>2</sub>, “double-decker” type Pd<sub>3</sub>L<sub>4</sub> cage, and “hour-glass” shaped Pd<sub>3</sub>L<sub>4</sub> cage, respectively.

## 5. Single crystal XRD data analysis

**Crystallographic Data Collection and Refinement.** X-ray data was collected with a Bruker AXS Kappa Apex II CCD diffractometer equipped with graphite monochromated Mo K $\alpha$  ( $\lambda = 0.7107\text{\AA}$ ) radiation. Crystal fixed at the tip of the glass fiber was mounted on the Goniometer head and was optically centered. The automatic cell determination routine, with 36 frames at three different orientations of the detector was employed to collect reflections and the program APEXII-SAINT (Bruker, 2008) was used for finding the unit cell parameters.<sup>10</sup> A 4-fold redundancy per reflection was utilized for achieving good absorption correction using a multiscan procedure. Besides absorption, Lorentz polarization and decay correction were



applied during data reduction. The program SADABS (Bruker, 2008) was used for absorption correction using the multiscan procedure. The structures were solved by direct methods using SHELXS-97, (Sheldrick, 2008)<sup>11</sup> and refined by full-matrix least squares techniques using SHELXL-97 (Sheldrick, 2014)<sup>12</sup> computer program. All hydrogen atoms were fixed at chemically meaningful positions and riding model refinement was applied. Molecular graphics were generated using Mercury programs.<sup>13</sup> For cage **4a'**, PLATON/SQUEEZE (Spek, 2009)<sup>14</sup> was employed to remove the excess electron density resulting from the disordered sea of solvent molecules, subsequently resulting in improved refinement. ORTEPs were generated using ORTEP-3.<sup>15</sup>

Single crystals of cage, **4a'** suitable for X-ray diffraction studies were obtained by slow diffusion of n-butanol into a solution of cage, **4a'** in DMF solvent. X-ray diffraction data indicated that the cage **4a'** belongs to a triclinic space group  $P\bar{1}$ . The asymmetric unit consists of the two palladium(II) ions (one palladium(II) with full and other with half occupancies), two ligand strands and three nitrate anions. The suitable single crystals for X-ray diffraction studies were obtained by slow diffusion of n-butanol into DMSO containing the complex, **6a**. The complex crystallized in a triclinic space group  $P\bar{1}$ . The asymmetric unit consists of the two palladium(II) ions (one palladium(II) with full and other with half occupancies), two ligand strands, two nitrate anions and two DMSO molecules.

**Crystal structures of trinuclear Pd<sub>3</sub>L<sub>4</sub> type cages.** However, NMR and mass spectrometry cannot provide a complete specific configuration of Pd<sub>3</sub>L<sub>4</sub> cages due to the presence of possible isomers in solution state. To further investigate the details of supramolecular architecture, single crystal X-ray diffraction was utilized to characterize the specific structural configuration of the corresponding trinuclear cages. The suitable single crystals of the complexes **4a'** and **6a** were obtained from their DMF and DMSO solutions by slow vapour diffusion methods. Three

square planar Pd(II) centres are bridged by four ligands in each cage. The detail descriptions are provided in later paragraphs.

**Crystal structure of the cage  $[\text{Pd}_3(\text{L4})_4](\text{NO}_3)_6$ , **4a'**.** The crystal structure of the self-assembled cage shown in Figure S111 unambiguously supports the unique “hour-glass” shaped trinuclear cage configuration in which the two terminal  $\text{PdN}_4$  planes of the cage, **4a'**, parallel to each other, are perpendicular to the vertically oriented middle  $\text{PdN}_4$  plane. Crystallographic data and structure refinement parameters for the cage **4a'** are summarized in the Table S1. A total of four ligand strands coordinate to three Pd(II) sites in which the terminal pyridines of the each ligand strand coordinated to one Pd(II) centre whereas internal pyridine coordinated to another Pd(II) centre and forming an “hour-glass” shaped  $\text{Pd}_3\text{L}_4$  cage.

**Crystal structure of the cage  $[\text{Pd}_3(\text{L2})_4](\text{NO}_3)_6$ , **5b** and **5b'**.** Several attempts to characterize the complex **5b** and **5b'** by single crystal XRD were unsuccessful.

**Crystal structure of the cage  $[\text{Pd}_3(\text{L6})_4](\text{NO}_3)_6$ , **6a**.** In crystal structure of cage, **6a** all  $\text{PdN}_4$  planes are parallel to each other and oriented vertically one above other to form a double-decker type structural arrangement with two identical compartments and two molecules of DMSO were found within each of the compartments probably by electrostatic interaction of  $(\text{O})_{\text{DMSO}}$  with metal ions and several  $\text{CH}\cdots\text{O}$  interactions using  $(\text{O})_{\text{urea}}$  and  $(\text{H})_{\text{DMSO}}$  to fill the space. The distances between the  $\text{Pd}_1\text{-Pd}_2$  and  $\text{Pd}_1\text{-Pd}_1$  were found to be 14.42 and 28.84 Å. All the NH groups of sixteen urea moieties are disposed exohedrally thus making the outside edge of the cage suitable for interaction with anions.

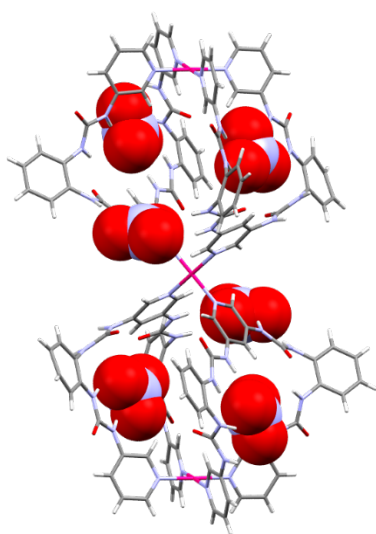

**Fig. S84** Crystal structure of the cage  $[\text{Pd}_3(\text{L4})_4](\text{NO}_3)_6$ , **4a'** showing dispositions of nitrate anions. Solvent molecules are omitted for clarity.

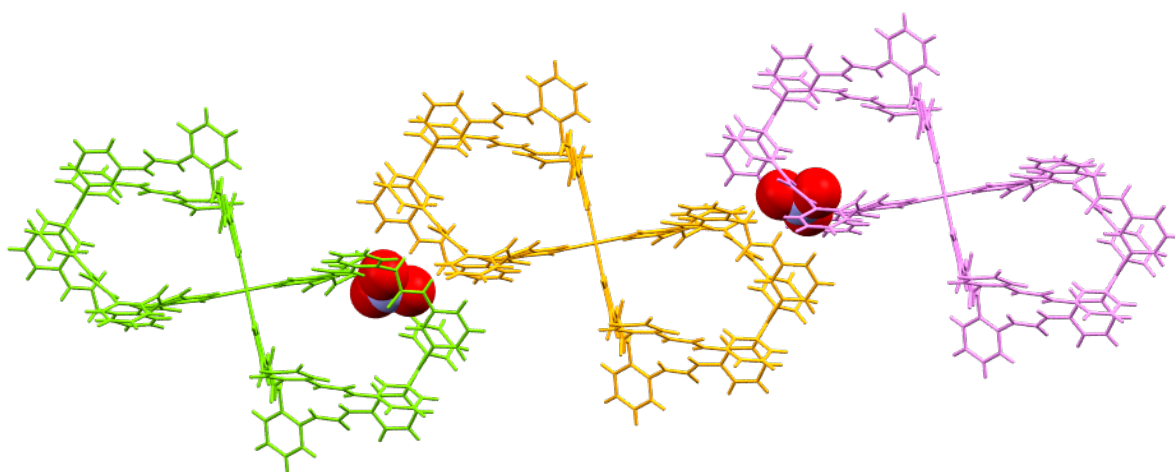

**Fig. S85** Packing diagram representing the interactions of one unit of  $[\text{Pd}_3(\text{L4})_4](\text{NO}_3)_6$ , **4a'** with two neighboring units. Solvent molecules are omitted for clarity.

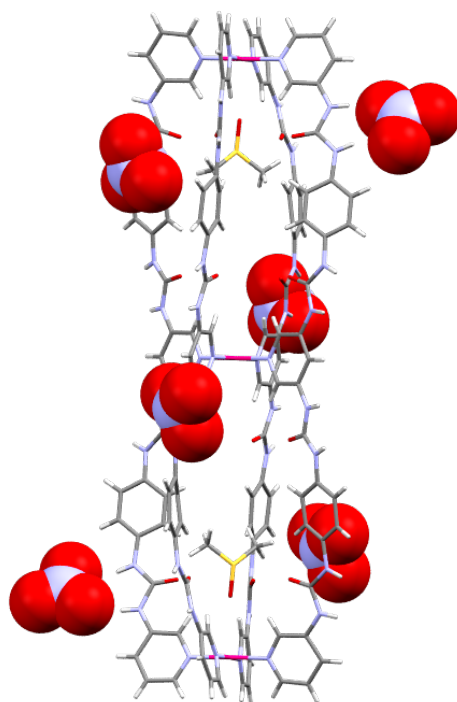

**Fig. S86** Crystal structure of the cage  $[\text{Pd}_3(\text{L6})_4](\text{NO}_3)_6$ , **6a** showing dispositions of nitrate anions. Solvent molecules are omitted for clarity.

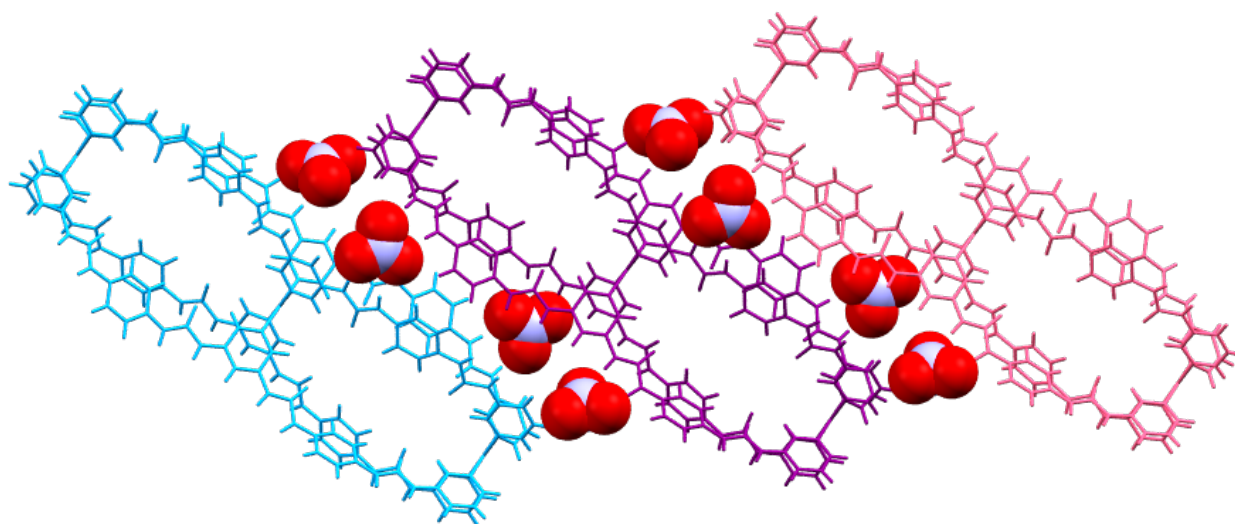

**Fig. S87** Packing diagram representing the interactions of one unit of  $[\text{Pd}_3(\text{L6})_4](\text{NO}_3)_6$ , **6a** with two neighboring units. Solvent molecules are omitted for clarity.

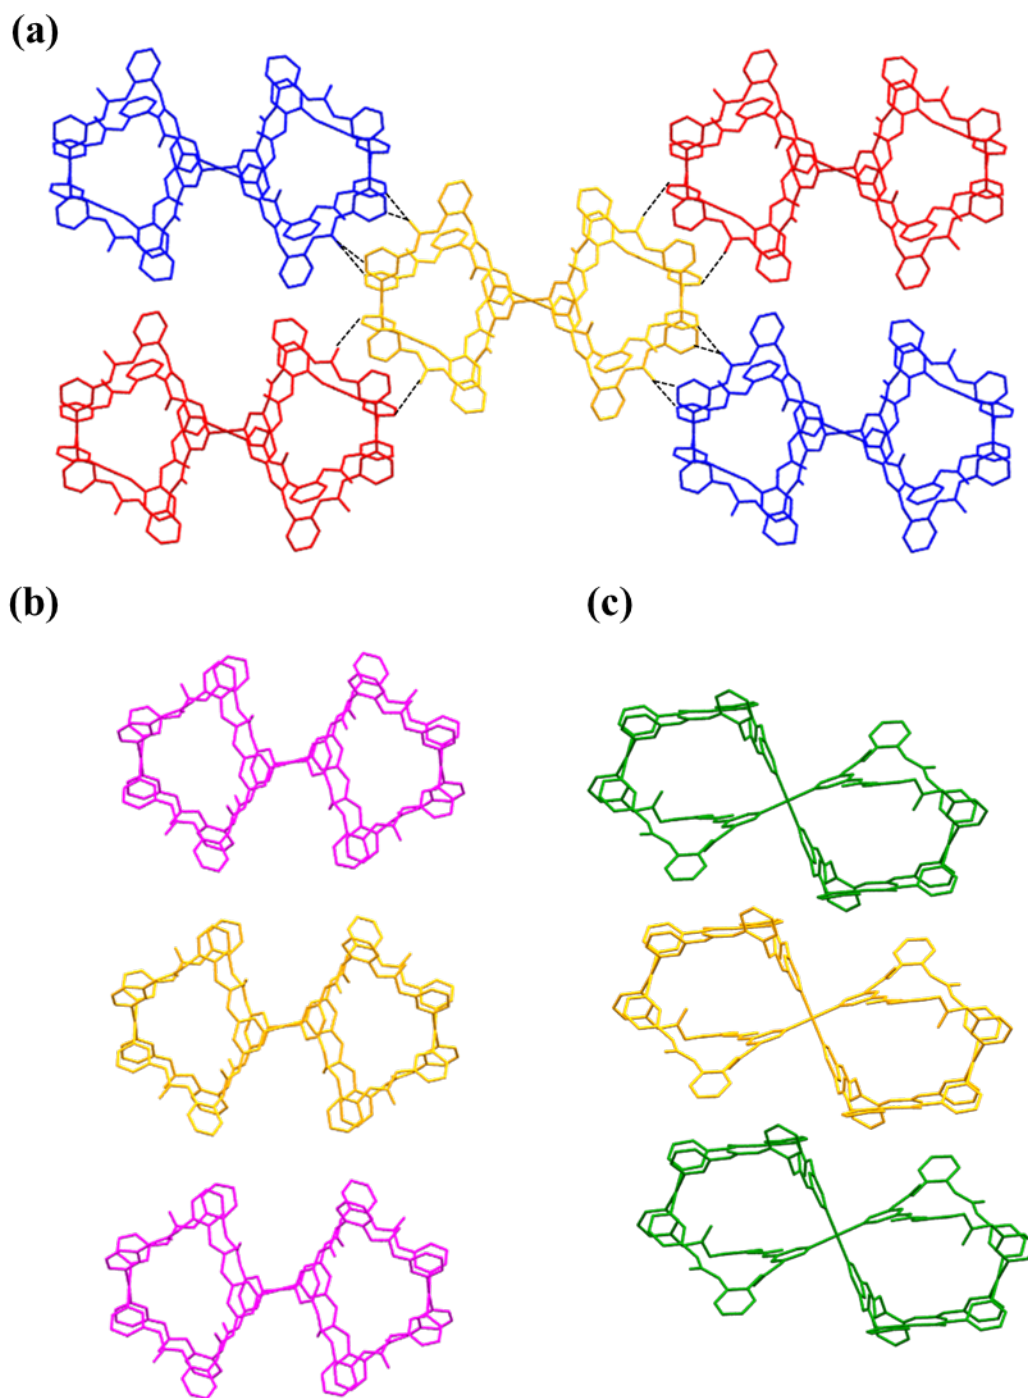

**Fig. S88** Packing diagram of  $[\text{Pd}_3(\text{L4})_4](\text{NO}_3)_6$ , **4a'** in some other views. Solvent molecules and hydrogen atoms are omitted for clarity.

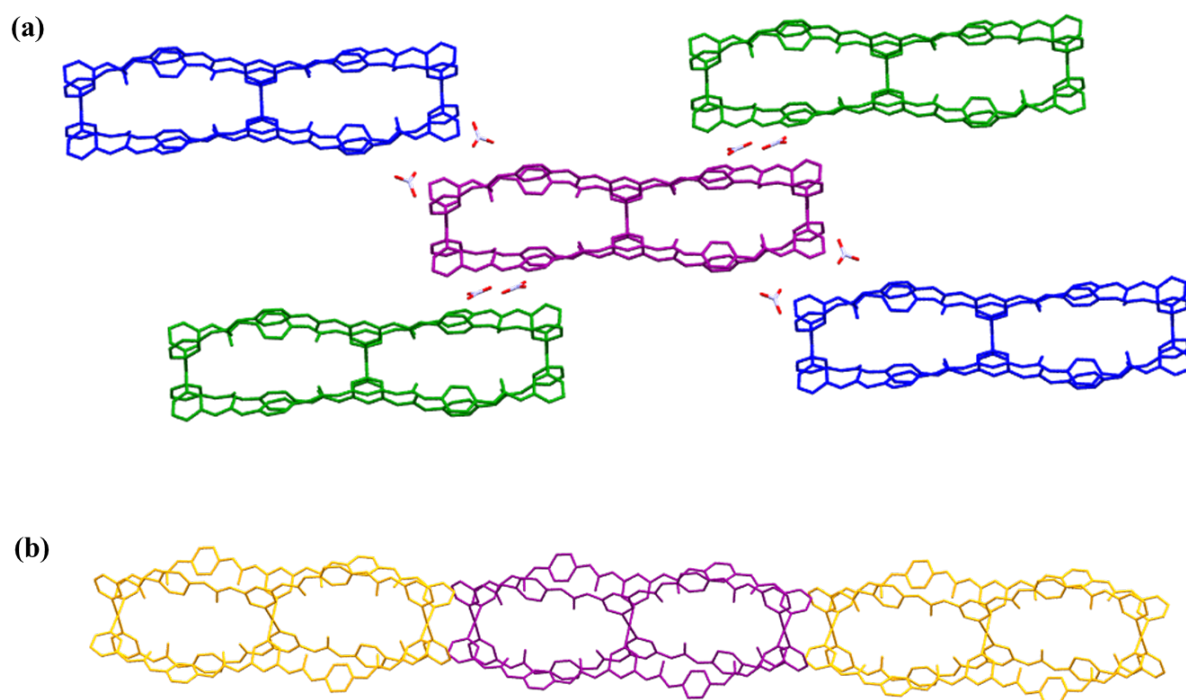

**Fig. S89** Packing diagram of  $[\text{Pd}_3(\text{L6})_4](\text{NO}_3)_6$ , **6a** in some other views. Solvent molecules and hydrogen atoms are omitted for clarity.

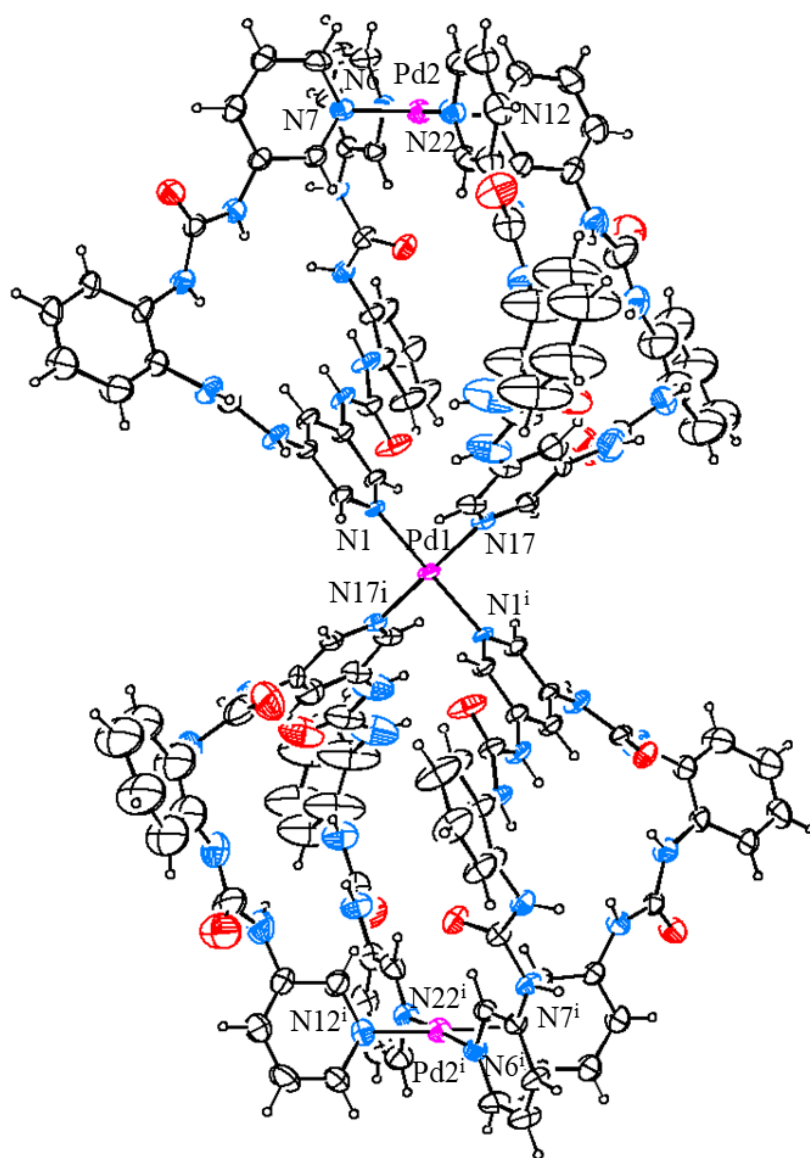

**Fig. S90** ORTEP diagram for trinuclear cage  $[\text{Pd}_3(\text{L4})_4](\text{NO}_3)_6$ , **4a'** showing labeling of palladium atoms and nitrogen atoms which are coordinated to palladium only. All anions and solvent molecules of crystallization are omitted for clarity. (Thermal ellipsoids are shown in 20% probability).

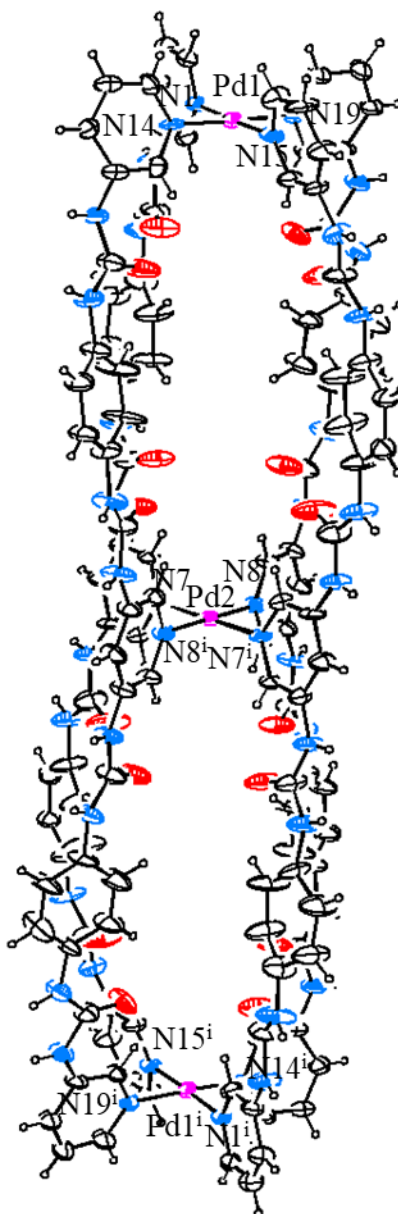

**Fig. S91** ORTEP diagram for trinuclear cage  $[\text{Pd}_3(\text{L6})_4](\text{NO}_3)_6$ , **6a** showing labeling of palladium atoms and nitrogen atoms which are coordinated to palladium only. All anions and solvent molecules of crystallization are omitted for clarity. (Thermal ellipsoids are shown in 20% probability).



**Table S1.** Crystallographic data and structure refinement parameters for trinuclear cages [Pd<sub>3</sub>(L4)<sub>4</sub>](NO<sub>3</sub>)<sub>6</sub>, **4a'** and [Pd<sub>3</sub>(L6)<sub>4</sub>](NO<sub>3</sub>)<sub>6</sub>, **6a**.

| Parameters                                          | <b>4a'</b>                                                                        | <b>6a</b>                                                                                         |
|-----------------------------------------------------|-----------------------------------------------------------------------------------|---------------------------------------------------------------------------------------------------|
| CCDC No                                             | <b>2167195</b>                                                                    | <b>2167196</b>                                                                                    |
| Empirical formula                                   | C <sub>124</sub> H <sub>108</sub> N <sub>50</sub> O <sub>34</sub> Pd <sub>3</sub> | C <sub>66</sub> H <sub>66</sub> N <sub>24</sub> O <sub>16</sub> Pd <sub>1.50</sub> S <sub>2</sub> |
| Formula weight                                      | 3161.80                                                                           | 1675.14                                                                                           |
| Crystal size (mm)                                   | 0.220 x 0.150 x 0.100                                                             | 0.250 x 0.220 x 0.100                                                                             |
| Temperature (K)                                     | 296(2)                                                                            | 296(2)                                                                                            |
| Wavelength (Å)                                      | 0.71073                                                                           | 0.71073                                                                                           |
| Crystal system                                      | Triclinic                                                                         | Triclinic                                                                                         |
| space group                                         | P $\bar{1}$                                                                       | P $\bar{1}$                                                                                       |
| <i>a</i> (Å)                                        | 14.6119(7)                                                                        | 13.5383(10)                                                                                       |
| <i>b</i> (Å)                                        | 19.5758(9)                                                                        | 19.9005(15)                                                                                       |
| <i>c</i> (Å)                                        | 21.2217(8)                                                                        | 21.4915(16)                                                                                       |
| $\alpha$ (°)                                        | 101.622(2)                                                                        | 84.364(3)                                                                                         |
| $\beta$ (°)                                         | 95.405(2)                                                                         | 78.149(3)                                                                                         |
| $\gamma$ (°)                                        | 109.496(2)                                                                        | 87.554(3)                                                                                         |
| Volume (Å) <sup>3</sup>                             | 5518.6(4)                                                                         | 5637.9(7)                                                                                         |
| <i>Z</i>                                            | 1                                                                                 | 2                                                                                                 |
| <i>D</i> <sub>calc</sub> (mg/m <sup>3</sup> )       | 0.951                                                                             | 0.987                                                                                             |
| absorption coefficient (mm <sup>-1</sup> )          | 0.302                                                                             | 0.333                                                                                             |
| <i>F</i> (000)                                      | 1612                                                                              | 1718                                                                                              |
| $\theta$ min/max (deg)                              | 0.995 to 21.407                                                                   | 1.349 to 19.044                                                                                   |
| <i>h</i> , <i>k</i> , <i>l</i><br>(min, max)        | (-14, 14)<br>(-20, 20)<br>(-21, 21)                                               | (-12, 12)<br>(-18, 18)<br>(-19, 19)                                                               |
| Reflections collected /<br>unique                   | 47441 / 12422                                                                     | 34117/9027                                                                                        |
| <i>R</i> <sub>int</sub>                             | 0.0693                                                                            | 0.0719                                                                                            |
| Data / restraints / parameters                      | 12422 / 96 / 941                                                                  | 9027/0/992                                                                                        |
| Goodness-of-fit on <i>F</i> <sup>2</sup>            | 0.871                                                                             | 0.897                                                                                             |
| Final <i>R</i> indices [ <i>I</i> > 2σ( <i>I</i> )] | <i>R</i> 1 = 0.0537, <i>wR</i> 2 = 0.1296                                         | <i>R</i> 1 = 0.0559, <i>wR</i> 2 = 0.1403                                                         |
| <i>R</i> indices<br>(all data)                      | <i>R</i> 1 = 0.0878, <i>wR</i> 2 = 0.1402                                         | <i>R</i> 1 = 0.0826, <i>wR</i> 2 = 0.1505                                                         |
| Largest diff peak and hole<br>(Å) <sup>3</sup>      | 0.425 and -0.312                                                                  | 0.458 and -0.262                                                                                  |

## References

- 1 M. C. Naranthatta, D. Das, D. Tripathy, H. S. Sahoo, V. Ramkumar and D. K. Chand, *Cryst. Growth Des.*, 2012, **12**, 6012-6022.
- 2 M. -O. M. Piepenbrock, N. Clarke and J. W. Steed, *Soft Matter*, 2011, **7**, 2412-2418.
- 3 Y. Y. Chu-Farseeva, N. Mustafa, A. Poulsen, E. C. Tan, J. J. Y. Yen, W. J. Chng and B. W. Dymock, *Eur. J. Med. Chem.*, 2018, **158**, 593-619.
- 4 L. Lee, Y. R. Leroux, P. Hapiot and A. Downard, *Langmuir*, 2015, **31**, 5071-5077.
- 5 H. Dasary, R. Jagan and D. K. Chand, *Inorg. Chem.*, 2018, **57**, 12222-12231.
- 6 M. J. Frisch, G. W. Trucks, H. B. Schlegel, G. E. Scuseria, M. A. Robb, J. R. Cheeseman, G. Scalmani, V. Barone, G. A. Petersson, H. Nakatsuji, X. Li, M. Caricato, A. V. Marenich, J. Bloino, B. G. Janesko, R. Gomperts, B. Mennucci, H. P. Hratchian, J. V. Ortiz, A. F. Izmaylov, J. L. Sonnenberg, D. W.-Young, F. Ding, F. Lipparini, F. Egidi, J. Goings, B. Peng, A. Petrone, T. Henderson, D. Ranasinghe, V. G. Zakrzewski, J. Gao, N. Rega, G. Zheng, W. Liang, M. Hada, M. Ehara, K. Toyota, R. Fukuda, J. Hasegawa, M. Ishida, T. Nakajima, Y. Honda, O. Kitao, H. Nakai, T. Vreven, K. Throssell, J. A. Montgomery, J. E. Peralta, F. Ogliaro, M. J. Bearpark, J. J. Heyd, E. Brothers, K. N. Kudin, V. N. Staroverov, T. A. Keith, R. Kobayashi, J. Normand, K. Raghavachari, A. P. Rendell, J. C. Burant, S. S. Iyengar, J. Tomasi, M. Cossi, J. M. Millam, M. Klene, C. Adamo, R. Cammi, J. W. Ochterski, R. L. Martin, K. Morokuma, O. Farkas, J. B. Foresman and D. J. Fox, *Gaussian 16*, Revision A.03; Gaussian, Inc.: Wallingford, CT, 2016.
- 7 A. D. Becke, *Phys. Rev. A.*, 1988, **38**, 3098-3100.
- 8 D. A. McMorran and P. Steel, *Supramol. Chem.*, 2002, **14**, 79-85.

- 9 S. Bandi, A. K. Pal, G. S. Hanan and D. K. Chand, *Chem. - A Eur. J.*, 2014, **20**, 13122-13126.
- 10 SAINT, version 7.06a; Bruker AXS Inc., Madison, Wisconsin, 2008.
- 11 G. M. Sheldrick, *Acta Crystallogr. A*, 2008, **64**, 112-122.
- 12 G. M. Sheldrick, *Acta Crystallogr. C*, 2015, **71**, 3-8.
- 13 C. F. Macrae, P. R. Edgington, P. McCabe, E. Pidcock, G. P. Shields, R. Taylor, M. Towler and J. van de Streek, *Mercury: visualization and analysis of crystal structures. J. Appl. Crystallogr.* 2006, **39**, 453–457.
- 14 A. L. Speck, *Acta Crystallogr. D*, 2009, **65**, 148-155
- 15 L. J. Farrugia, *WinGX and ORTEP for Windows: an update. J. Appl. Crystallogr.* 2012, **45**, 849–854.
